# Supplementary material for: Factors influencing developmental delay among young children in poor rural China: a latent variable approach
Source: PubMed Central journal article supplement — BMJ Open. 2018 Sep 1;8(8):e021628. doi: 10.1136/bmjopen-2018-021628 (PMC6120651; doi:10.1136/bmjopen-2018-021628), 2018-09-01
Supplement: bmjopen-2018-021628.draft_revisions.pdf [file bmjopen-2018-021628.draft_revisions.pdf]

# BMJ Open

BMJ Open is committed to open peer review. As part of this commitment we make the peer review history of every article we publish publicly available.

When an article is published we post the peer reviewers' comments and the authors' responses online. We also post the versions of the paper that were used during peer review. These are the versions that the peer review comments apply to.

The versions of the paper that follow are the versions that were submitted during the peer review process. They are not the versions of record or the final published versions. They should not be cited or distributed as the published version of this manuscript.

BMJ Open is an open access journal and the full, final, typeset and author-corrected version of record of the manuscript is available on our site with no access controls, subscription charges or pay-per-view fees (<http://bmjopen.bmj.com>).

If you have any questions on BMJ Open's open peer review process please email [info.bmjopen@bmj.com](mailto:info.bmjopen@bmj.com)

# BMJ Open

## Factors influencing developmental delay among young children in poor rural China: a latent variable approach

|                               |                                                                                                                                                                                                                                                                                                                                                                                                                                                                                                                                                                                                                                                                                                                                                                                                                                     |
|-------------------------------|-------------------------------------------------------------------------------------------------------------------------------------------------------------------------------------------------------------------------------------------------------------------------------------------------------------------------------------------------------------------------------------------------------------------------------------------------------------------------------------------------------------------------------------------------------------------------------------------------------------------------------------------------------------------------------------------------------------------------------------------------------------------------------------------------------------------------------------|
| Journal:                      | <i>BMJ Open</i>                                                                                                                                                                                                                                                                                                                                                                                                                                                                                                                                                                                                                                                                                                                                                                                                                     |
| Manuscript ID                 | bmjopen-2018-021628                                                                                                                                                                                                                                                                                                                                                                                                                                                                                                                                                                                                                                                                                                                                                                                                                 |
| Article Type:                 | Research                                                                                                                                                                                                                                                                                                                                                                                                                                                                                                                                                                                                                                                                                                                                                                                                                            |
| Date Submitted by the Author: | 10-Jan-2018                                                                                                                                                                                                                                                                                                                                                                                                                                                                                                                                                                                                                                                                                                                                                                                                                         |
| Complete List of Authors:     | Zhang, Jingxu; Peking University Health Science Centre, Department of Maternal and Child Health; Ministry of Health Key Laboratory of Reproductive Health<br>Guo, Sufang; UNICEF China<br>Li, Ying; Peking University Health Science Centre, Department of Maternal and Child Health<br>Wei, Qianwei; Peking University Health Science Centre, Department of Maternal and Child Health<br>Zhang, Cuihong; Peking University Health Science Centre, Department of Maternal and Child Health<br>Wang, Xiaoli; Peking University Health Science Centre, Department of Maternal and Child Health<br>Luo, Shusheng; Peking University Health Science Centre, Department of Maternal and Child Health<br>Zhao, Chunxia; UNICEF China<br>Scherpbier, Robert; UNICEF China, Health and Nutrition, Water, Environment and Sanitation Section |
| Keywords:                     | Child protection < PAEDIATRICS, Community child health < PAEDIATRICS, Developmental neurology & neurodisability < PAEDIATRICS, PUBLIC HEALTH                                                                                                                                                                                                                                                                                                                                                                                                                                                                                                                                                                                                                                                                                        |
|                               |                                                                                                                                                                                                                                                                                                                                                                                                                                                                                                                                                                                                                                                                                                                                                                                                                                     |

SCHOLARONE™  
Manuscripts

1  
2  
3  
4 **1 Title Page**  
5  
6  
7

8 **2 Title:** Factors influencing developmental delay among young  
9  
10  
11 **3 children in poor rural China: a latent variable approach**  
12  
13

14 **4 Authors:**  
15  
16

17 Jingxu Zhang<sup>1</sup>, Sufang Guo<sup>2</sup>, Ying Li<sup>1</sup>, Qianwei Wei<sup>1</sup>, Cuihong Zhang<sup>1</sup>, Xiaoli Wang<sup>1\*</sup>,  
18 Shusheng Luo<sup>1</sup>, Chunxia Zhao<sup>2</sup>, Robert W. Scherpbier<sup>2</sup>  
19

20  
21 Corresponding author: Xiaoli Wang  
22

23  
24 Postal address: 38 Xueyuan Road, Haidian District, Beijing, China 100191  
25

26 Email address: [xlwang@bjmu.edu.cn](mailto:xlwang@bjmu.edu.cn) (XW)  
27

28  
29 Tel: 86-010-8280-0173  
30

31 **11 Institutional addresses:**  
32  
33

34 <sup>1</sup>Peking University Health Science Center, Department of Maternal and Child Health,  
35 Ministry of Health Key Laboratory of Reproductive Health, 38 Xueyuan Road, Haidian  
36 District, Beijing, China 100191  
37  
38

39  
40 <sup>2</sup>UNICEF China, 12 Sanlitun Road, Chaoyang District, Beijing 100600, China  
41  
42

43 **Email:** Jingxu Zhang (Email: [jxzhang@bjmu.edu.cn](mailto:jxzhang@bjmu.edu.cn)); Sufang Guo (Email:  
44

45 [sguo@unicef.org](mailto:sguo@unicef.org)); Ying Li (Email: [loveshanye\\_penny@126.com](mailto:loveshanye_penny@126.com)); Qianwei Wei (Email:  
46

47 [wqianweiai@126.com](mailto:wqianweiai@126.com)); Cuihong Zhang (Email: [chzhang25@gmail.com](mailto:chzhang25@gmail.com)); Xiaoli Wang  
48

49 (Email: [xlwang@bjmu.edu.cn](mailto:xlwang@bjmu.edu.cn)); Shusheng Luo (Email: [luoss@163.com](mailto:luoss@163.com)); Chunxia Zhao  
50  
51

52 (Email: [czhao@unicef.org](mailto:czhao@unicef.org)); Robert W. Scherpbier (Email: [rscherpbier@unicef.org](mailto:rscherpbier@unicef.org))  
53  
54  
55

1  
2  
3 21 **Word Count:** 3802 words.  
4  
5  
6  
7  
8  
9  
10  
11  
12  
13  
14  
15  
16  
17  
18  
19  
20  
21  
22  
23  
24  
25  
26  
27  
28  
29  
30  
31  
32  
33  
34  
35  
36  
37  
38  
39  
40  
41  
42  
43  
44  
45  
46  
47  
48  
49  
50  
51  
52  
53  
54  
55  
56  
57  
58  
59  
60

22

For peer review only

1  
2  
3  
4 **23 Abstract**

5  
6  
7 24 **OBJECTIVES:** The aims of the study were to determine the prevalence of suspicious  
8  
9 25 developmental delay in children living in poor rural China and to investigate factors  
10  
11  
12 26 influencing child developmental delay.

13  
14  
15 27 **DESIGN:** A community-based, cross-sectional survey was conducted.

16  
17  
18 28 **SERRING:** 83 villages in Shangxi and Guizhou Provinces, China.

19  
20  
21 29 **PARTICIPANTS:** 2,514 children aged 6-35 months and their first caretakers.

22  
23  
24 30 **OUTCOMES MEASURES:** Child suspicious developmental delay using the Ages & Stages  
25  
26 31 Questionnaires -Chinese version. Caregivers' education and age, wealth index Infants, child  
27  
28  
29 32 feeding index, parent-child interaction, number of books and Zung self-rating depression  
30  
31  
32 33 scale were all parent reported. Haemoglobin value measured using a calibrated, automated  
33  
34  
35 34 analyzer. Birth weight obtained from medical record.

36  
37  
38 35 **RESULTS:** Overall, 35.7% of the surveyed children aged 6-35 months demonstrated  
39  
40  
41 36 suspicious developmental delay. The prevalence of suspicious developmental delay was  
42  
43  
44 37 inversely associated with age, with the prevalence among young children aged 6-11 months  
45  
46  
47 38 nearly doubling that of children aged 30-35 months (48.9% and 22.8%, respectively). Using a  
48  
49  
50 39 structural equation model, it was demonstrated that caregiver's care and stimulus factors and  
51  
52  
53 40 child's hemoglobin level were directly correlated, while caregiver's socio-demographic  
54  
55  
56 41 factors were indirectly associated with suspicious developmental delay.

1  
2  
3  
4 42 CONCLUSIONS: The prevalence of suspicious developmental delay is high in poor rural  
5  
6 43 areas of China. Interventions to improve child development are needed in poor rural area of  
7  
8  
9 44 China.

10  
11  
12 45 Key words: Suspicious Developmental Delay; Infants and young children; Structural  
13  
14  
15 46 equation model; Rural China  
16  
17

18 47

19  
20  
21 48 **Strengths and limitations of this study**

- 22  
23 49 • This pilot study includes suspicious developmental delay among children under 3 years  
24  
25  
26 50 of age in poor rural areas of China.  
27  
28  
29 51 • A structural equation model is a good approach to examine the influencing factors on  
30  
31  
32 52 suspicious developmental delay.  
33  
34  
35 53 • A few binary variables were not incorporated in the structural equation model because of  
36  
37  
38 54 methodological limitation.  
39

40 55  
41  
42  
43  
44  
45  
46  
47  
48  
49  
50  
51  
52  
53  
54  
55  
56  
57  
58  
59  
60

## 56 INTRODUCTION

57 Developmental delay encompasses a wide spectrum of impairments or lack of developmental  
58 features that are appropriate to the child's age. It may manifest in various aspects, including  
59 physical, mental, language, and social domains[1,2]. Worldwide, developmental delay  
60 accounts for more morbidity across the lifespan than any other chronic conditions[3]. A  
61 conservative estimate is that across the world more than 200 million children under 5 years  
62 old failed to reach their potential in cognitive and social-emotional development. As a  
63 number of social factors such as poverty, malnutrition, lack of appropriate care, and child  
64 abuse and neglect, have been identified as potential contributing factors to developmental  
65 delay [4], developmental delay has been a major issue in low and middle-income countries.  
66 Moreover, national statistics on young children's cognitive or social emotional development  
67 are not available for most developing countries. This gap contributes to the invisibility of the  
68 issue of development delay. With a total of 15 million disadvantaged children (defined as  
69 stunted, living in poverty, or both), China has the third largest number of disadvantaged  
70 children globally, following India (65 million) and Nigeria (16 million)[4]. It is clear that  
71 interventions and policies designed to promote child development and prevent or ameliorate  
72 developmental delay are urgently needed as China moves forward.

73 The pathway between poverty and poor development described by Walker et al is built on the  
74 fact that poverty is associated with inadequate food, and poor access to water, sanitation and

1  
2  
3  
4 75 hygiene [5]. Poverty is also related to poor maternal education, increasing maternal stress,  
5  
6  
7 76 depression, and inadequate stimulation at home. All these factors detrimentally affect child  
8  
9  
10 77 development, and this deprived development may lead to poor school performance and  
11  
12 78 achievement. In addition, poverty and socio-cultural context risk factors may increase young  
13  
14  
15 79 children's exposure to biological and psychosocial risks, and the accumulation in risks often  
16  
17  
18 80 significantly harm child development. Children in developing countries are frequently  
19  
20  
21 81 exposed to multiple and cumulative risks negatively affecting their development, especially  
22  
23  
24 82 through changes in their brain structure and function, and behavioral changes[6].

25  
26 83 Biological risk factors related to young children's developmental delay include infectious  
27  
28  
29 84 disease, chronic malnutrition, iodine deficiency, iron deficiency, anemia, malaria, low birth  
30  
31  
32 85 weight, preterm birth, and exposure to lead or arsenic, etc.[5,7-10].

33  
34  
35 86 Psychological risk factors associated with developmental delay are mainly related to  
36  
37  
38 87 parenting, more specifically, cognitive stimulation, caregiver sensitivity and responsiveness  
39  
40  
41 88 to the child, and caregiver affect in terms of emotional warmth or rejection of the child[5].

42  
43 89 Parents and caregivers can play an important role in providing the child with a healthy, safe  
44  
45  
46 90 and caring environment[11].

47  
48  
49 91 The effects of these biological and psychological risk factors are sensitive to contextual  
50  
51  
52 92 factors such as poverty and maternal depression[5]. Common mental disorders, including  
53  
54  
55 93 depression and anxiety among women during pregnancy, or in the first post-partum year, are



1  
2  
3  
4 94 recognized as a public health issue globally. There are emerging evidence show that maternal  
5  
6 95 mental disorders have adverse impacts on physical and psychological development of fetuses  
7  
8  
9 96 and infants[12-18].  
10  
11  
12 97 To sum up, various social, biological and psychological factors may contribute to child  
13  
14  
15 98 developmental delay. The existing evidence indicated that four major risk factors affect at  
16  
17  
18 99 least 20–25% of children in developing countries[5]: inadequate cognitive stimulation,  
19  
20  
21 100 stunting, iron deficiency, and iodine deficiency. There is a paucity of data on the prevalence  
22  
23  
24 101 and risk factors for developmental delay in China, especially in poor rural areas where  
25  
26  
27 102 children are at high risk for developmental delay due to the economic and social restraints. In  
28  
29  
30 103 addition, although the influencing factors for child developmental delay have been widely  
31  
32  
33 104 studied, the relationships among these factors and their direct and indirect associations with  
34  
35  
36 105 the development outcome were seldom examined in the existing literature. The goals of this  
37  
38  
39 106 study were to determine the prevalence of developmental delay in young children in rural  
40  
41  
42 107 China and compare the prevalence of developmental delay in rural China to other developing  
43  
44  
45 108 countries, and to explore factors contributing to child developmental delay.

## 109 **METHOD**

### 110 **Participants and Design**

111 A community-based cross-sectional survey on child health, nutrition and development was  
112 conducted between July and September 2013 in remote mountainous areas of Shanxi and

1  
2  
3  
4 113 Guizhou provinces, located in the central and south-west regions of China respectively. The  
5  
6  
7 114 survey sites were the project sites of the Integrated Early Childhood Development (IECD)  
8  
9  
10 115 Project funded by UNICEF. A total of 83 villages were selected from six counties of the two  
11  
12 116 provinces based on the following criteria: 1) having at least 50 children under 3 years old; 2)  
13  
14  
15 117 having a township health center staffed with maternal and child health professionals; 3)  
16  
17  
18 118 reachable by vehicles. All the children under 3 years and their primary caregivers (defined as  
19  
20  
21 119 person(s) who take primary responsibility for taking care of child in the family) in the chosen  
22  
23  
24 120 villages were eligible for the study. Altogether, 2,953 children out of the 4,288 children in the  
25  
26  
27 121 83 villages participated in the study and their primary caregivers finished the survey. The  
28  
29  
30 122 response rate was 68.9%. All caretakers provided their written informed consent to  
31  
32  
33 123 participate in this study. The study was reviewed and approved by Peking University  
34  
35  
36 124 Biomedical Ethics Committee.  
37  
38  
39 125 For this analysis, children with hearing disabilities (e.g., deaf children) (n=16) were excluded  
40  
41  
42 126 because the disabilities may directly affect their performance. In addition, we excluded  
43  
44  
45 127 children aged 1-5 months (n=326) because their hemoglobin values were not tested; children  
46  
47  
48 128 with implausible hemoglobin values (n =1, Hb =225 g/L ); and respondents who were not  
49  
50  
51 129 primary caregivers (n =96). Therefore, the final sample size for this analysis was 2,514  
52  
53  
54 130 children.

### 131 **Study Instruments**

1  
2  
3  
4 132 *Outcome measure : Child developmental delay measurement*

5  
6 133 The Ages & Stages Questionnaires -Chinese version (ASQ-C), which was validated recently  
7  
8  
9 134 in Chinese, was used to assess children's development status. ASQ-C includes various  
10  
11  
12 135 dimensions, including communication, gross motor (GM), fine motor (FM), problem solving  
13  
14  
15 136 (CG) and social emotional (SE) (Bian, Yao, Squires, Wei, Chen & Fang, 2010). Each of the  
16  
17  
18 137 domains contains six sub-items. The responses of 'yes', 'sometimes', or 'not yet' were given  
19  
20  
21 138 scores of 10, 5, and 0 points, respectively. Development delay in a certain domain was  
22  
23  
24 139 defined as if domain score was lower than 2SD (Standard Deviation) of the cutoff point in the  
25  
26  
27 140 normative norm in that domain. Overall suspicious development delay was defined as if there  
28  
29  
30 141 was delay in any one of five domains of ASQ, including communication, gross motor, fine  
31  
32 142 motor, problem solving, and personal-social domain.

33  
34  
35 143 *Social, biological and psychological factors*

36  
37 144 Household survey questionnaire

38  
39  
40 145 A face-to-face interview was conducted with the child caregivers using a structured  
41  
42  
43 146 questionnaire developed based on UNICEF's 5th Multiple Indicator Cluster Survey (MICS5).  
44  
45  
46 147 The questionnaire contained questions on the household socioeconomic status, family  
47  
48  
49 148 structure, health and development of children under five years old and their mother in the  
50  
51  
52 149 household. Wealth index was developed based on the number of household appliances  
53  
54  
55 150 (telephone, TV, washing machine, refrigerator, and internet connection).

1  
2  
3  
4 151 Zung self-rating depression scale (ZSDS)  
5

6 152 The Zung Self-rating Depression Scale (ZSDS), validated and widely utilized in China[19-  
7  
8  
9 153 21], was used to assess caregivers' mental health status. The scale comprises 20 items and  
10  
11  
12 154 each question is scored on a scale of 1-4 based on the following responses: never or rarely,  
13  
14  
15 155 sometimes, most of the time, or always. A score between 50 and 69 indicates depression, and  
16  
17  
18 156 a score of 70 or above indicates severe depression. In this study, caregivers with a score of 50  
19  
20  
21 157 or more were identified as positive for depression [22]

22  
23 158 Infants and child feeding index (ICFI)  
24

25  
26 159 The Infant and child feeding index (ICFI), based on a dietary recall of the past 24 hours from  
27  
28  
29 160 a questionnaire, was used to gather information on current feeding practices of children. This  
30  
31  
32 161 index includes practices related to breastfeeding, bottle feeding, feeding frequency and food  
33  
34  
35 162 diversity given to the children prior to the survey being conducted. The ICFI was developed  
36  
37  
38 163 on the basis of current feeding practices for infants and young children recommended by  
39  
40  
41 164 WHO[23] and proposed by Ruel and Menon[24]. To take into account the age specific  
42  
43  
44 165 feeding recommendations, the ICFI was compiled separately for three age groups: 6-8  
45  
46 166 months, 9-11 months and 12-35 months. A score of 2 was added if the child was breastfed; 1  
47  
48  
49 167 point added if the child had never been bottle-fed; 2 points added if the child's feeding  
50  
51  
52 168 frequency met the recommendation; and 1 point if the feeding frequency was below the  
53  
54  
55 169 recommendation but above zero. Dietary diversity of food groups refers to the number of  
56

1  
2  
3  
4 170 different food groups provided to the child. Altogether 7 food groups were counted, and a  
5  
6 171 score of +2 was added if 4 or more food groups were consumed, and a score of +1 was added  
7  
8  
9 172 if 1 to 3 food groups were consumed.

### 173 Parent-child interaction

174 The level of parent-child interaction was assessed based on the following six activities that  
175 caregivers did with their child: 1) reading books to the child, 2) telling stories to the child, 3)  
176 singing songs to or with the child, 4) taking the child outdoor, 5) playing toys with the child,  
177 and 6) naming, counting or drawing things to promote learning with the child. If one of the  
178 above mentioned behaviors were reported by the caregivers, +1 score was given, with the  
179 highest possible score of +6.

### 180 Haemoglobin value

181 Trained staff collected capillary blood sample from the child and measured their hemoglobin  
182 (Hb) concentration using a calibrated, automated analyzer (HemoCue 201 [HemoCue,  
183 Angelholm, Sweden]). Anemia is defined as a hemoglobin concentration <110 g/L, based on  
184 the global definition for preschool children and adjusted for altitude[25]. Children with  
185 anemia were referred to an appropriate health facility for treatment.

### 186 Anthropometric measurements

187 Birth weight was obtained from medical record.

188

### 189 **Data Analysis**

1  
2  
3  
4 190 Data analysis was performed using SPSS for Windows (version 16.0, SPSS Inc., Chicago, IL,  
5  
6  
7 191 USA). Descriptive statistics were provided as median, range and interquartile range for  
8  
9  
10 192 continuous variables and count and percentage for categorical variables. A structural  
11  
12 193 equation model (Amos 20 for Windows, IBM, Armonk, NY, USA) was used to test if the  
13  
14  
15 194 hypothetical explanatory model fits the observed data and to apply the asymptotically  
16  
17  
18 195 distribution-free estimate. The hypothetical explanatory model was derived from literature  
19  
20  
21 196 [4,5]and the univariate regression result. The assignment rules and explanation of variables in  
22  
23  
24 197 the structural equation model are described in Table 1. The model was modified according to  
25  
26  
27 198 statistics suggested by the modification index in Amos. An absolute value of  $\geq 1.96$  ( $p \leq 0.05$ )  
28  
29  
30 199 for the standardized  $\beta$ -coefficient T was considered significant. Goodness of fit index (GFI),  
31  
32  
33 200 normal fit index (NFI), comparative fit index (CFI) and root mean squared error of  
34  
35  
36 201 approximation (RMSEA) were used to test model fit. For GFI, CFI and NFI, 1 means a  
37  
38  
39 202 perfect fit while  $>0.9$  indicates an adequate fit. For RMSEA,  $<0.05$  indicates a good model.  
40  
41  
42 203 Chi-square statistic to test the null hypothesis was not required as the sample size  
43  
44  
45 204 was  $>1000$ [26].

46 205 Table 1. Assignment rules and explanation of variables in structural equation model

| Variables             | assignment rules or explanation |
|-----------------------|---------------------------------|
| caregiver's education | illiteracy,+1                   |
|                       | primary school,+2               |
|                       | junior high school,+3           |

---

|    |                                |                                                                                                                                                                                                        |
|----|--------------------------------|--------------------------------------------------------------------------------------------------------------------------------------------------------------------------------------------------------|
| 1  |                                |                                                                                                                                                                                                        |
| 2  |                                |                                                                                                                                                                                                        |
| 3  |                                | senior high school and above,+4                                                                                                                                                                        |
| 4  |                                |                                                                                                                                                                                                        |
| 5  | caregiver's age                | caregiver's integer age                                                                                                                                                                                |
| 6  |                                |                                                                                                                                                                                                        |
| 7  |                                |                                                                                                                                                                                                        |
| 8  | wealth index                   | numbers of accessories including phone(telephone or mobile),washing machine, refrigerator, TV set, access to Internet                                                                                  |
| 9  |                                |                                                                                                                                                                                                        |
| 10 |                                |                                                                                                                                                                                                        |
| 11 |                                |                                                                                                                                                                                                        |
| 12 |                                |                                                                                                                                                                                                        |
| 13 |                                |                                                                                                                                                                                                        |
| 14 | parent-child interaction       | 6 behaviors including read books to child, told stories, sang songs, took child outside the home, played with child, and named, counted or drew things to promote learning would form stimulus signals |
| 15 |                                |                                                                                                                                                                                                        |
| 16 |                                |                                                                                                                                                                                                        |
| 17 |                                |                                                                                                                                                                                                        |
| 18 |                                |                                                                                                                                                                                                        |
| 19 | numbers of books               | numbers of books children owned presently                                                                                                                                                              |
| 20 |                                |                                                                                                                                                                                                        |
| 21 |                                |                                                                                                                                                                                                        |
| 22 | score of ZSDS                  | reversed score of caregiver's depression assessed by the Zung Self-rating Depression Scale                                                                                                             |
| 23 |                                |                                                                                                                                                                                                        |
| 24 |                                |                                                                                                                                                                                                        |
| 25 |                                |                                                                                                                                                                                                        |
| 26 |                                | Breastfeeding:                                                                                                                                                                                         |
| 27 |                                |                                                                                                                                                                                                        |
| 28 |                                | 6-9 mo: No=0; Yes= +2;                                                                                                                                                                                 |
| 29 |                                |                                                                                                                                                                                                        |
| 30 |                                | 9-11 mo: No=0; Yes=+2;                                                                                                                                                                                 |
| 31 |                                |                                                                                                                                                                                                        |
| 32 |                                | 12-35 mo: No=0; Yes=+1.                                                                                                                                                                                |
| 33 |                                |                                                                                                                                                                                                        |
| 34 |                                | Bottle feeding: Yes=0; No=+1;                                                                                                                                                                          |
| 35 | ICFI                           |                                                                                                                                                                                                        |
| 36 |                                | Feeding frequency:                                                                                                                                                                                     |
| 37 |                                |                                                                                                                                                                                                        |
| 38 |                                | 6-9 mo: 0 meal = 0; 1 meal = +1; 2 meals or more = +2;                                                                                                                                                 |
| 39 |                                |                                                                                                                                                                                                        |
| 40 |                                | 9-11 mo: 0 meal = 0; 1-2 meals = +1; 3 meals or more = +2;                                                                                                                                             |
| 41 |                                |                                                                                                                                                                                                        |
| 42 |                                | 12-35 mo: 0-1 meals = 0; 2-3 meals = +1; 4 meals or more = +2;                                                                                                                                         |
| 43 |                                |                                                                                                                                                                                                        |
| 44 |                                | Dietary diversity: 0 group = 0; 1-3 groups = +1; 4 or more groups = +2                                                                                                                                 |
| 45 |                                |                                                                                                                                                                                                        |
| 46 | birth weight                   | birth weight of child (medical records or parental report)                                                                                                                                             |
| 47 |                                |                                                                                                                                                                                                        |
| 48 | haemoglobin value for children | haemoglobin value we tested                                                                                                                                                                            |
| 49 |                                |                                                                                                                                                                                                        |
| 50 | Communication                  | score of communication assessed by ASQ                                                                                                                                                                 |
| 51 |                                |                                                                                                                                                                                                        |
| 52 | gross motor                    | score of gross motor assessed by ASQ                                                                                                                                                                   |
| 53 |                                |                                                                                                                                                                                                        |
| 54 | fine motor                     | score of fine motor assessed by ASQ                                                                                                                                                                    |
| 55 |                                |                                                                                                                                                                                                        |

---

---

problem solving                      score of problem solving assessed by ASQ

social emotional                      score of social emotional assessed by ASQ

---

206 Note: ZSDS: Zung Self-rating Depression Scale; ICFI: infant and young child feeding index

207

## 208 RESULTS

### 209 Demographic, Socio-economic Characteristics of Participants

210 About 21.0% of children surveyed were 6-11 months, while 41.1% were 12-23 months, and  
 211 37.9% were 24-35 months. Slightly more boys were included in the survey than girls (56.8%  
 212 versus 43.2%, respectively) (Table 2). About half (47.9%) were the firstborn children and  
 213 11.4% were left-behind children (i.e. their parents are migrant workers who leave rural areas  
 214 for the cities while leaving children behind in their hometowns). More than one-third (35.5%)  
 215 were ethnic minority children. Most of the caregivers interviewed (79.6%) were mothers. The  
 216 average age of caregivers was 30.19 years with a standard deviation (SD) of 9.71 years; a  
 217 majority (62.1%) of caregivers interviewed aged 20-29 years. Most (63.5%) had completed  
 218 at least 9 years of education (i.e. secondary education). Among the surveyed households,  
 219 51% lived under the national poverty line of US\$1 per day and 45% lived more than 5  
 220 kilometers to the nearest health facilities.

221 Table 2. Sociodemographic and clinical characteristics of sampled child-caregiver pairs (N=2514)

---

|  | N | % |  | N | % |
|--|---|---|--|---|---|
|--|---|---|--|---|---|

---



|    |                      |      |      |                             |      |      |
|----|----------------------|------|------|-----------------------------|------|------|
| 1  |                      |      |      |                             |      |      |
| 2  |                      |      |      |                             |      |      |
| 3  | Child age            |      |      | Caregivers interviewed      |      |      |
| 4  |                      |      |      |                             |      |      |
| 5  | 6-11                 | 528  | 21.0 | Mother                      | 2002 | 79.6 |
| 6  |                      |      |      |                             |      |      |
| 7  |                      |      |      |                             |      |      |
| 8  | 12-23                | 1034 | 41.1 | Father                      | 189  | 7.5  |
| 9  |                      |      |      |                             |      |      |
| 10 |                      |      |      |                             |      |      |
| 11 | 24-35                | 952  | 37.9 | Grandparents                | 320  | 12.7 |
| 12 |                      |      |      |                             |      |      |
| 13 |                      |      |      |                             |      |      |
| 14 | Child gender         |      |      | Others                      | 3    | 0.1  |
| 15 |                      |      |      |                             |      |      |
| 16 |                      |      |      |                             |      |      |
| 17 | Male                 | 1427 | 56.8 | Caregivers' age             |      |      |
| 18 |                      |      |      |                             |      |      |
| 19 |                      |      |      |                             |      |      |
| 20 | Female               | 1087 | 43.2 | <20                         | 42   | 1.7  |
| 21 |                      |      |      |                             |      |      |
| 22 |                      |      |      |                             |      |      |
| 23 | Having elder sibling |      |      | 20-                         | 1561 | 62.1 |
| 24 |                      |      |      |                             |      |      |
| 25 |                      |      |      |                             |      |      |
| 26 | Yes                  | 1277 | 50.8 | 30-                         | 539  | 21.4 |
| 27 |                      |      |      |                             |      |      |
| 28 |                      |      |      |                             |      |      |
| 29 | No                   | 1203 | 47.9 | 40-                         | 349  | 13.9 |
| 30 |                      |      |      |                             |      |      |
| 31 |                      |      |      |                             |      |      |
| 32 | Unknown              | 34   | 1.4  | Unknown                     | 23   | 0.9  |
| 33 |                      |      |      |                             |      |      |
| 34 |                      |      |      |                             |      |      |
| 35 | Left-behind children |      |      | Caregivers' education       |      |      |
| 36 |                      |      |      |                             |      |      |
| 37 | Yes                  | 286  | 11.4 | Illiteracy                  | 256  | 10.2 |
| 38 |                      |      |      |                             |      |      |
| 39 |                      |      |      |                             |      |      |
| 40 | No                   | 2228 | 88.6 | Primary education           | 661  | 26.3 |
| 41 |                      |      |      |                             |      |      |
| 42 |                      |      |      |                             |      |      |
| 43 | Ethnicity            |      |      | Secondary                   | 1277 | 50.8 |
| 44 |                      |      |      |                             |      |      |
| 45 |                      |      |      |                             |      |      |
| 46 | Han                  | 1621 | 64.5 | Above secondary             | 320  | 12.7 |
| 47 |                      |      |      |                             |      |      |
| 48 |                      |      |      |                             |      |      |
| 49 | Minority             | 893  | 35.5 | Distance to health facility |      |      |
| 50 |                      |      |      |                             |      |      |
| 51 |                      |      |      |                             |      |      |
| 52 |                      |      |      | <5km                        | 1345 | 53.5 |
| 53 |                      |      |      |                             |      |      |
| 54 |                      |      |      |                             |      |      |
| 55 |                      |      |      |                             |      |      |
| 56 |                      |      |      |                             |      |      |
| 57 |                      |      |      |                             |      |      |
| 58 |                      |      |      |                             |      |      |
| 59 |                      |      |      |                             |      |      |
| 60 |                      |      |      |                             |      |      |

|         |      |      |
|---------|------|------|
| ≥5km    | 1131 | 45.0 |
| Unknown | 38   | 1.5  |

222

### 223 Suspicious Developmental Delay among Children under 3 Years Old

224 Overall, 35.7% of the surveyed children under 3 years of age had suspicious developmental  
 225 delay (Table 3). Across all age groups, prevalence of suspicious developmental delay was  
 226 inversely associated to the child's age, with the highest rate (48.9%) among children aged 6-  
 227 11 months and lowest (22.8%) among children aged 30-35 months. Across all domains, delay  
 228 in communication was the lowest (8.9%) and delay in fine motor was the highest (20.6%),  
 229 while other domains ranged from 15.1% to 16.7%.

230 Table 3. Prevalence of child suspicious development delay

|                                   | 6-months  | 12-months | 18-months | 24-months | 30-months | Total     |
|-----------------------------------|-----------|-----------|-----------|-----------|-----------|-----------|
|                                   | n(%)      | n(%)      | n(%)      | n(%)      | n(%)      | n(%)      |
|                                   | N=538     | N=473     | N=561     | N=517     | N=435     | N=2514    |
| suspicious<br>Developmental delay | 258(48.0) | 210(44.4) | 207(36.9) | 123(23.8) | 99(22.8)  | 897(35.7) |
| Delay in subscales:               |           |           |           |           |           |           |
| Communication                     | 92(17.4)  | 46(9.7)   | 46(8.2)   | 22(4.3)   | 18(4.1)   | 224(8.9)  |
| Gross motor                       | 107(20.3) | 85(18.0)  | 83(14.8)  | 61(11.8)  | 44(10.1)  | 380(15.1) |
| Fine motor                        | 157(29.7) | 145(30.7) | 144(25.7) | 50(9.7)   | 23(5.3)   | 519(20.6) |

|                  |           |           |          |          |          |           |
|------------------|-----------|-----------|----------|----------|----------|-----------|
| Problem solving  | 98(18.6)  | 131(27.7) | 84(15.0) | 50(9.7)  | 56(12.9) | 419(16.7) |
| Social emotional | 102(19.3) | 92(19.5)  | 96(17.1) | 63(12.2) | 52(12.0) | 405(16.1) |

231

### 232 **Social, biological and psychological factors**

233 The wealth index in the surveyed families ranged from 0 to 5, with a median of 4, indicating  
 234 that most of the families owned major appliances. The parent-child interaction scores ranged  
 235 from 0 to 6, with a median score of 6. On average, the surveyed children owned only 1 book  
 236 (median=1, IQR=3). Caregivers' ZSDS in this survey ranged from 38 to 80, with a median  
 237 score of 63.76. Nearly two-fifths of caregivers (38.5%) had symptoms of depression. The  
 238 ICFI ranged from 0 to 7, with a median score of 2. The hemoglobin values for the surveyed  
 239 children were 51 to 178 g/L, with a median of 110 g/L. Anemia prevalence was high at  
 240 43.8%. Birth weight of the surveyed children ranged from 1.40 to 6.00 kilograms, with a  
 241 median of 3.30 kilograms; 2.9% had low birth weight (i.e. birth weight less than 2.5 kg) .

242

### 243 **Structural Equation Model for Children's Developmental Delay**

244 About half of the squared multiple correlation of variables were more than 0.50 (Table S1),  
 245 which indicated that the variables had a good reliability. In the final structural equation  
 246 model (shown in Table 4), ICFI and birth weight were excluded from the model, because of  
 247 lack of statistically significant relationships with other variables. Figure 1 shows the  
 248 estimated covariance and paths for this model. Three factors influencing children's

1  
2  
3  
4 249 developmental status were identified: 1) caregiver sociodemographic factors such as  
5  
6  
7 250 caregiver's education, age, and wealth index (total effect =0.23 on child developmental  
8  
9  
10 251 status); 2) care and stimulus factors measured by parent-child interaction, number of books  
11  
12 252 and ZSDS score (direct effect= 0.57); and 3) child's hemoglobin level (direct effect= 0.07).  
13  
14  
15 253 Younger caregivers were more likely to interact with children than older caregivers  
16  
17  
18 254 (covariance of residuals =-0.18) and the latent variable- caregiver's sociodemographic  
19  
20  
21 255 factors-had a direct positive effect on 'care and stimulus factors' (path coefficient=0.40) and  
22  
23  
24 256 an indirect positive effect on children's developmental status. The overall model fit was good  
25  
26  
27 257 as reflected by the goodness of fit index of 0.977 and the comparative fit index of 0.884.  
28  
29  
30  
31 259  
32  
33 260  
34  
35  
36  
37  
38  
39  
40  
41  
42  
43  
44  
45  
46  
47  
48  
49  
50  
51  
52  
53  
54  
55  
56  
57  
58  
59  
60

Table 4. Regression weights of structural equation model

| Equation                                                         | Estimates<br>(unstandardized) | Estimates<br>(Standardized) | Standard Error | Critical ratio | P value |
|------------------------------------------------------------------|-------------------------------|-----------------------------|----------------|----------------|---------|
| Regression weights                                               |                               |                             |                |                |         |
| Care and stimulus ← caregiver factors                            | 0.402                         | 0.401                       | 0.047          | 8.497          | <0.001  |
| Children's developmental status ← care and stimulus              | 9.608                         | 0.573                       | 0.913          | 10.525         | <0.001  |
| Children's developmental status ← haemoglobin value for children | 0.593                         | 0.071                       | 0.178          | 3.331          | 0.001   |
| Caregivers' education ← caregiver factors                        | 1.000                         | 0.794                       |                |                |         |
| Caregivers' age ← caregiver factors                              | -8.358                        | -0.576                      | 0.543          | -15.380        | <0.001  |
| Wealth index ← caregiver factors                                 | 0.775                         | 0.461                       | 0.055          | 14.163         | <0.001  |
| parent-child interaction ← care and stimulus                     | 1.000                         | 0.456                       |                |                |         |
| Numbers of books ← care and stimulus                             | 1.687                         | 0.303                       | 0.220          | 7.678          | <0.001  |
| Score of ZSDS ← care and stimulus                                | 4.856                         | 0.415                       | 0.488          | 9.944          | <0.001  |
| Communication ← Children's developmental status                  | 0.863                         | 0.622                       | 0.029          | 30.054         | <0.001  |
| Gross motor ← Children's developmental status                    | 0.970                         | 0.726                       | 0.030          | 32.608         | <0.001  |
| Fine motor ← Children's developmental status                     | 1.132                         | 0.778                       | 0.028          | 40.216         | <0.001  |

|                                                    |         |        |       |        |        |
|----------------------------------------------------|---------|--------|-------|--------|--------|
| Problem solving ← Children's developmental status  | 1.188   | 0.848  | 0.030 | 40.212 | <0.001 |
| Social emotional ← Children's developmental status | 1.000   | 0.752  |       |        |        |
| Covariance                                         |         |        |       |        |        |
| e8 ↔ e10                                           | -19.912 | -0.248 | 2.961 | -6.725 | <0.001 |
| e3 ↔ e5                                            | 0.620   | 0.188  | 0.064 | 9.708  | <0.001 |
| e2 ↔ e4                                            | -1.695  | -0.175 | 0.270 | -6.290 | <0.001 |
| e1 ↔ e5                                            | 0.364   | 0.215  | 0.051 | 7.136  | <0.001 |
| e5 ↔ e7                                            | 3.079   | 0.076  | 0.680 | 4.527  | <0.001 |
| e5 ↔ e6                                            | -2.709  | -0.115 | 0.575 | -4.712 | <0.001 |
| e2 ↔ e6                                            | -5.270  | -0.100 | 1.247 | -4.228 | <0.001 |

262

Note: ZSDS: Zung Self-rating Depression Scale

1  
2  
3  
4 263 **DISCUSSION**

5  
6 264 Our results showed that the prevalence of suspicious developmental delay among children  
7  
8  
9 265 aged 6-35 months was high and inversely associated with children's age in poor rural China.  
10  
11  
12 266 Furthermore, by using the structural equation model, some risk factors for children's  
13  
14  
15 267 suspicious development delay and their relationship were identified. So far only one study  
16  
17  
18 268 examined developmental delay in rural China and reported a prevalence of 20.0% in  
19  
20  
21 269 cognitive development and 32.3% in psychomotor development among children aged 6-12  
22  
23  
24 270 months[27]. Our study revealed that 35.7% of rural children under 3 years of age had  
25  
26  
27 271 suspicious developmental delay and that among children aged 6-12 months, 17-20% of them  
28  
29  
30 272 had delay in communication, problem solving, social emotional and gross motor, and nearly  
31  
32  
33 273 30% had delay in fine motor development. Overall the prevalence observed in our study was  
34  
35  
36 274 comparable to the results from the previous study. According to the very limited data from  
37  
38  
39 275 the WHO report[28], the reported prevalence of developmental delay in young children was  
40  
41  
42 276 17% in Senegal, 15% in Nigeria, 13% in India, and 24% in Brazil. The lower prevalence  
43  
44  
45 277 reported by other developing countries may reflect the underestimated rates and inaccurate  
46  
47  
48 278 measurement of developmental delay. Promoting early childhood development (ECD) is a  
49  
50  
51 279 critical issue. It is recommended that government and healthcare providers should pay more  
52  
53  
54 280 attention to early diagnosis and intervention of developmental delay. Among the five  
55  
56  
57  
58  
59  
60

1  
2  
3  
4 281 domains of ASQ, suspicious developmental delay of fine motor had the highest prevalence.  
5

6  
7 282 This is a key finding that requires further intervention in poor rural areas of China.  
8

9  
10 283 It was found in the structural equation model that caregiver's sociodemographic factors, care  
11  
12 284 and stimulus factors and hemoglobin values of children were directly or indirectly associated  
13  
14  
15 285 with suspicious developmental delay. These findings indicate potential areas that future  
16  
17  
18 286 intervention programs should focus on, including improving child's feeding and nutrition,  
19  
20  
21 287 raising public awareness of the issue of developmental delay, and improving parenting skills  
22  
23  
24 288 to increase interaction with children.  
25

26 289

### 27 28 290 **Relations between caregiver factors and child development**

29  
30 291 Our results showed that younger caregivers with higher education level and wealth index had  
31  
32  
33 292 an indirect, positive effect on their child's development. Previous studies have investigated  
34  
35  
36 293 the relations between caregivers' socio-demographic factors and child development. In a  
37  
38  
39 294 population-based study in Argentina and a cohort study in Brazil, it was found that poverty  
40  
41  
42 295 and maternal education were associated with early attainment of selected developmental  
43  
44  
45 296 milestones or cognitive and motor development [29,30]. Another report also indicated that  
46  
47  
48 297 parenting cognitive stimulation, caregiver's responsiveness, and caregiver's affect are  
49  
50  
51 298 sensitive to contextual factors such as poverty, cultural values and practices[5]. The findings  
52  
53  
54 299 from our study are consistent with these previous results. In addition, our study revealed that  
55  
56 300 caregiver factors were indirect predictors of their child's development delay. Although



1  
2  
3  
4 301 caregiver factors had no direct effect on their child's developmental status, these factors such  
5  
6 302 as caregivers' education, age and poverty level may impact other factors therefore indirectly  
7  
8  
9 303 affecting developmental delay. More attention should be paid to change these contextual  
10  
11  
12 304 factors when designing future interventions to improve children's development and health.

13  
14 305

### 16 306 **Relations between care and stimulus factors and child development**

17  
18  
19 307 The current study revealed that the most important predictor on child's suspicious  
20  
21  
22 308 developmental delay was care and stimulus factors (path coefficient=0.57). Better parent-  
23  
24  
25 309 child interaction, more books and less maternal depression had positive effect on child  
26  
27  
28 310 development. Children who had one score point increase on care and stimulus factors had  
29  
30  
31 311 0.57 score increase on child development. The findings of the current study were consistent  
32  
33  
34 312 with previous studies showing the protective effect of parent-child interaction, children's  
35  
36  
37 313 books and optimistic caregivers on child development[31]. Thus, it is necessary to promote  
38  
39  
40 314 parent-child interactions, through encouraging activities such as reading books to their child,  
41  
42  
43 315 telling stories to their child, singing songs to and with their child, bringing their child to play  
44  
45  
46 316 outdoors, playing toys with their child, and naming, counting or drawing things to promote  
47  
48  
49 317 learning that would form stimulus signals[5,32,33]. Depression among caregivers was also  
50  
51  
52 318 alarmingly high in our study sample, confirming findings from previously published studies  
53  
54  
55 319 [34,35]. Our results also found caregivers with depression had increased risk on adverse  
56  
57  
58 320 effects on child development[17,36]. The previously published studies have shown

1  
2  
3  
4 321 depression among caregivers not only impact children's physical health, but also place  
5  
6 322 children at a higher risk of developmental delay[37,38]. It is well-established that maternal  
7  
8  
9 323 depression during the period that the mother–infant interaction was observed (concurrent or  
10  
11  
12 324 recent maternal depression) was associated with reduced maternal responsiveness, which was  
13  
14  
15 325 positively associated with later emotional, cognitive and physical development of the  
16  
17  
18 326 infant[39,40]. Our study revealed a latent variable, care and stimulus factors that include  
19  
20  
21 327 caregiver depression scores and parent-child interaction scores, had a comprehensive impact  
22  
23  
24 328 on child development. Accordingly, these findings suggest an urgent need for child  
25  
26  
27 329 development interventions on children's care and stimulus factors in poor rural China.

28  
29 330

### 30 331 **Relations between Hb values and child development**

31  
32  
33 332 Our study found hemoglobin values of children had a positive effect on child development.  
34  
35  
36 333 Other biological factors, such as birth weight of children and ICFI did not predict child  
37  
38  
39 334 development, which was not consistent with previous research[5]. A possible explanation  
40  
41  
42 335 might be that in our structural equation model, only continuous variables were involved and  
43  
44  
45 336 three variables in our study could not be converged as one latent variable, and each variable  
46  
47  
48 337 had poor correlations with the other two variables. Anemia among children was alarmingly  
49  
50  
51 338 high in our sample, confirming findings from a previous published study[41]. These findings  
52  
53  
54 339 point to a severe public health problem[42], and provide further evidence on anemia's  
55  
56  
57 340 negative impact on child growth and development[4,5,43]. Our survey found that the

1  
2  
3  
4 341 hemoglobin value of children had a positive effect on child development. On the positive side,  
5  
6 342 the Chinese government has realized this public health issue and has started providing  
7  
8  
9 343 micronutrient supplements named “Ying Yang Bao (YYB)” to 6-35 month old children living  
10  
11  
12 344 in poor rural areas free of charge. It is expected that this nutrition intervention program will  
13  
14  
15 345 decrease child anemia effectively. Although the current study did not find that birth weight  
16  
17  
18 346 and ICFI are associated with child development, it is known that poor maternal nutrition,  
19  
20  
21 347 infections and child feeding practices can impact child nutrition and development. Therefore,  
22  
23  
24 348 these areas still need to be monitored and improved through government interventions in poor  
25  
26 349 rural China.

27  
28 350

### 30 351 **Limitations**

32  
33 352 Our study had several limitations that should be discussed and considered. First, as a cross-  
34  
35  
36 353 sectional study, the associations identified in our study do not suggest a causal relationship  
37  
38  
39 354 between these factors and child’s suspicious developmental delay. Although the structured  
40  
41  
42 355 equation model is a powerful statistical technique for simultaneous consideration of the  
43  
44  
45 356 multiple variables measured, further evidence from cohort studies and interventional studies  
46  
47  
48 357 is needed to infer causal relationship. Second, because of the restrictions and limitations on  
49  
50  
51 358 structural equation model methodology and the software, many binary variables were not  
52  
53  
54 359 incorporated in the structural equation model, especially the variables measuring infant and  
55  
56 360 young child infections such as diarrhea and pneumonia. Third, this study was conducted in

1  
2  
3  
4 361 two provinces located in central and south-west regions of China. These study sites cannot  
5  
6 362 represent all poor rural areas of China. Caution is warranted when generalizing findings from  
7  
8  
9 363 our studies to rural areas in China.  
10

## 11 364 **Conclusions**

12  
13  
14  
15 365 These preliminary findings indicated that the prevalence of suspicious developmental delay is  
16  
17 366 high in poor rural areas of China. More attention needs to be paid to early childhood  
18  
19  
20 367 development (ECD). Interventions should specifically target and support families in poverty  
21  
22  
23 368 and with low education levels, as well as prioritize maternal and children nutrition and mental  
24  
25  
26 369 health, so as to improve fetal and early child development.  
27

## 28 29 370 **Acknowledgments**

30  
31  
32 371 The authors gratefully acknowledge the local healthcare providers in the field work for data  
33  
34  
35 372 collection, and thank all the participants in this study.  
36  
37

## 38 373 **A funding statement**

39  
40  
41 374 UNICEF grants 'Health and Nutrition' (0315-China/YH702).  
42  
43

## 44 375 **Competing interests**

45  
46  
47  
48 376 The authors declare that they have no competing interests.  
49  
50

## 51 377 **Author's contributions**

1  
2  
3  
4 378 Ying Li did the data analysis. Jingxu Zhang drafted the article. Sufang Guo, Xiaoli Wang and  
5  
6  
7 379 Robert W. Scherpbier designed the study. Jingxu Zhang, Qianwei Wei, Cuihong Zhang and  
8  
9  
10 380 Shusheng Luo collected the data. Xiaoli Wang and Chunxia Zhao critically revised the  
11  
12 381 manuscript. All authors read and approved the final manuscript.  
13  
14

15 382 **Data sharing statement**  
16

17  
18 383 The datasets analyzed during the current study are not publicly available, but are available  
19  
20  
21 384 from the corresponding author on reasonable request.  
22  
23

24 385 **Consent for publication**  
25

26  
27  
28 386 Not applicable.  
29  
30

31 387 **Ethics approval and consent to participate**  
32

33  
34 388 This study was approved by Peking University's Biomedical Ethics Committee. Consent was  
35  
36  
37 389 obtained from the participants/guardians/parents.  
38  
39  
40  
41  
42  
43  
44  
45  
46  
47  
48  
49  
50  
51  
52  
53  
54  
55  
56  
57  
58  
59  
60

**REFERENCES**

1. Gupta N, Kabra M. Approach to the diagnosis of developmental delay - the changing scenario. *Indian J Med Res* 2014;139(1):4-6. [published Online First: 2014/03/08]
2. Rimal HS, Pokharel A, Saha V, et al. Burden of Developmental and Behavioral Problems among Children - A Descriptive Hospital Based Study. *Journal of Nobel Medical College* 2014;3(1)
3. Organization WH. The global burden of disease: 2004 update: published by the Harvard School of Public Health on behalf of the World Health Organization and the World Bank : 2008.
4. Grantham-McGregor S, Cheung YB, Cueto S, et al. Developmental potential in the first 5 years for children in developing countries. *Lancet* 2007;369(9555):60-70. doi: 10.1016/s0140-6736(07)60032-4 [published Online First: 2007/01/09]
5. Walker SP, Wachs TD, Gardner JM, et al. Child development: risk factors for adverse outcomes in developing countries. *Lancet* 2007;369(9556):145-57. doi: 10.1016/s0140-6736(07)60076-2 [published Online First: 2007/01/16]
6. Wachs TD. Necessary but not sufficient: the role of individual and multiple influences on human development. Washington, DC:American Psychological Association Press, 2000.
7. Qian M, Wang D, Watkins WE, et al. The effects of iodine on intelligence in children: a meta-analysis of studies conducted in China. *Asia Pacific Journal of Clinical Nutrition* 2005;14(1):32.
8. Walker SP, Chang SM, Powell CA, et al. Effects of early childhood psychosocial stimulation and nutritional supplementation on cognition and education in growth-stunted Jamaican children: Prospective cohort study. *Lancet* 2005;366(9499):1804.
9. Fernando SD, Rodrigo C, Rajapakse S. The 'hidden' burden of malaria: cognitive impairment following infection. *Malaria Journal* 2010;9(1):1-11.

10. Carter JA, Neville BG, Newton CR. Neuro-cognitive impairment following acquired central nervous system infections in childhood: a systematic review. *Brain Research Reviews* 2003;43(1):57-69.
11. Tinajero, Alfredo R, Loizillon, et al. The Review of care, education and child development indicators in early childhood. 2012
12. Adewuya AO, Ola BO, Aloba OO, et al. Impact of postnatal depression on infants' growth in Nigeria. *Journal of affective disorders* 2008;108(1-2):191.
13. Misri S, Oberlander TF, Fairbrother N, et al. Relation between prenatal maternal mood and anxiety and neonatal health. *Canadian Journal of Psychiatry* 2004;49(10):684-9.
14. Reading R. Maternal depression increases infant risk of diarrhoeal illness: a cohort study. *Child Care Health & Development* 2007;33(2):24-8.
15. Rahman A, Iqbal Z, Bunn J, et al. Impact of maternal depression on infant nutritional status and illness: a cohort study. *Archives of General Psychiatry* 2004;61(9):946-52.
16. Huang J, Sherraden M, Purnell JQ. Impacts of Child Development Accounts on maternal depressive symptoms: evidence from a randomized statewide policy experiment. *Social Science & Medicine* 2014;112(112C):30.
17. Pearson RM, Melotti R, Heron J, et al. Disruption to the development of maternal responsiveness? The impact of prenatal depression on mother-infant interactions. *Infant Behav Dev* 2012;35(4):613-26.
18. Letourneau NL, Tramonte L, Willms JD. Maternal depression, family functioning and children's longitudinal development. *Journal of Pediatric Nursing* 2013;28(3):223.
19. Lee HC, Chiu HF, Wing YK, et al. The Zung Self-rating Depression Scale: screening for depression among the Hong Kong Chinese elderly. *Journal of Geriatric Psychiatry & Neurology* 1994;7(4):216.

- 1  
2  
3  
4  
5  
6  
7  
8  
9  
10  
11  
12  
13  
14  
15  
16  
17  
18  
19  
20  
21  
22  
23  
24  
25  
26  
27  
28  
29  
30  
31  
32  
33  
34  
35  
36  
37  
38  
39  
40  
41  
42  
43  
44  
45  
46  
47  
48  
49  
50  
51  
52  
53  
54  
55  
56  
57  
58  
59  
60
20. Mammadova F, Sultanov M, Hajiyeva A, et al. Translation and adaptation of the Zung Self-Rating Depression Scale for application in the bilingual Azerbaijani population. *Eur Psychiatry* 2012;27(Suppl 2):S27-S31.
21. Shen LL, Lao LM, Jiang SF, et al. A survey of anxiety and depression symptoms among primary-care physicians in China. *International Journal of Psychiatry in Medicine* 2012;44(3):257-70.
22. Zung WWK. A Self-Rating Depression Scale. *Archives of General Psychiatry* 1965;12(12):63.
23. Dewey K. Guiding principles for complementary feeding of the breastfed child. Washington D 2002
24. Ruel MT, Menon P. Child feeding practices are associated with child nutritional status in Latin America: innovative uses of the demographic and health surveys. *Journal of Nutrition* 2002;132(6):1180.
25. WHO. Haemoglobin concentrations for the diagnosis of anaemia and assessment of severity. Vitamin and Mineral Nutrition Information System. Geneva, World Health Organization, 2011 (WHO/NMH/NHD/MNM/11.1) (<http://www.who.int/vmnis/indicators/haemoglobin.pdf>, accessed [11/01/2016]).
26. Wu M. structural equation modeling: the operation and application of AMOS.
27. Luo R, Shi Y, Zhou H, et al. Micronutrient deficiencies and developmental delays among infants: evidence from a cross-sectional survey in rural China. *Bmj Open* 2015;5(10):e008400.
28. Organization WH. Developmental Difficulties in Early Childhood: Prevention, Early Identification, Assessment and Intervention in Low- And Middle-Income Countries: A Re. World Health Organization 2012



- 1  
2  
3 29. Lejarraga H, Pascucci MC, Krupitzky S, et al. Psychomotor development in Argentinean  
4 children aged 0 – 5 years. *Paediatric & Perinatal Epidemiology* 2002;16(1):47.  
5  
6  
7 30. Lima MC, Eickmann SH, Lima AC, et al. Determinants of mental and motor  
8 development at 12 months in a low income population: a cohort study in northeast Brazil.  
9  
10 *Acta Paediatrica* 2004;93(7):969-75.  
11  
12 31. Cheung YB, Yip PS, Karlberg JP. Fetal growth, early postnatal growth and motor  
13 development in Pakistani infants. *International Journal of Epidemiology* 2001;30(1):66-72.  
14  
15 32. Chiang YC, Lin DC, Lee CY, et al. Effects of parenting role and parent – child  
16 interaction on infant motor development in Taiwan Birth Cohort Study. *Early Human*  
17 *Development* 2015;91(4):259-64.  
18  
19 33. Kagitcibasi C, Sunar D, Bekman S. Long-term effects of early intervention: Turkish low-  
20 income mothers and children. *Journal of Applied Developmental Psychology*  
21  
22 2001;22(4):333-61.  
23  
24 34. Wolf AW, De AI, Lozoff B. Maternal depression in three Latin American samples. *Social*  
25 *Psychiatry & Psychiatric Epidemiology* 2002;37(4):169-76.  
26  
27 35. Organization WH. *Developmental Difficulties in Early Childhood: Prevention, Early*  
28 *Identification, Assessment and Intervention in Low- And Middle-Income Countries*. World  
29 *Health Organization* 2009.  
30  
31 36. Sohrpreston SL, Scaramella LV. Implications of Timing of Maternal Depressive  
32 Symptoms for Early Cognitive and Language Development. *Clin Child Fam Psychol Rev*  
33 2006;9(1):65-83.  
34  
35 37. Cooper PJ, Tomlinson M, Swartz L, et al. Post-partum depression and the mother-infant  
36 relationship in a South African peri-urban settlement. *British Journal of Psychiatry the*  
37 *Journal of Mental Science* 1999;175(6):554.  
38  
39  
40  
41  
42  
43  
44  
45  
46  
47  
48  
49  
50  
51  
52  
53  
54  
55  
56  
57  
58  
59  
60

- 1  
2  
3 38. Murray L, Cooper P. Effects of postnatal depression on infant development. Archives of  
4 Disease in Childhood 1997;77(2):99.  
5  
6  
7 39. Bigelow AE, Maclean K, Proctor J, et al. Maternal sensitivity throughout infancy:  
8 Continuity and relation to attachment security. Infant Behavior & Development  
9 2010;33(1):50-60.  
10  
11 40. Mcelwain NL, Boothlaforce C. Maternal sensitivity to infant distress and nondistress as  
12 predictors of infant-mother attachment security. Journal of Family Psychology Jfp Journal of  
13 the Division of Family Psychology of the American Psychological Association  
14 2006;20(2):247.  
15  
16 41. Hipgrave DB, Fu X, Zhou H, et al. Poor complementary feeding practices and high  
17 anaemia prevalence among infants and young children in rural central and western China.  
18 European Journal of Clinical Nutrition 2014;68(8):916.  
19  
20 42. Lawson JA. Comparative Quantification of Health Risks. Global and Regional Burden of  
21 Disease Attributable to Selected Major Risk Factors by Majid Ezzati; Alan D. Lopez;  
22 Anthony Rodgers; Christopher J.L. Murray. Canadian Nurse 2004;1:1(262):: 1.  
23  
24 43. Engle PL, Black MM, Behrman JR, et al. Strategies to avoid the loss of developmental  
25 potential in more than 200 million children in the developing world. The Lancet 2007; 369:  
26 229-242.  
27  
28  
29  
30  
31  
32  
33  
34  
35  
36  
37  
38  
39  
40  
41  
42  
43  
44  
45  
46  
47  
48  
49  
50  
51  
52  
53  
54  
55  
56  
57  
58  
59  
60

1  
2  
3  
4  
5  
6  
7  
8  
9  
10  
11  
12  
13  
14  
15  
16  
17  
18  
19  
20  
21  
22  
23  
24  
25  
26  
27  
28  
29  
30  
31  
32  
33  
34  
35  
36  
37  
38  
39  
40  
41  
42  
43  
44  
45  
46  
47  
48  
49  
50  
51  
52  
53  
54  
55  
56  
57  
58  
59  
60

Figure 1 Structural equation model and standardized coefficient for relationships between factors that theoretically influence children’s suspicious developmental delay

For peer review only

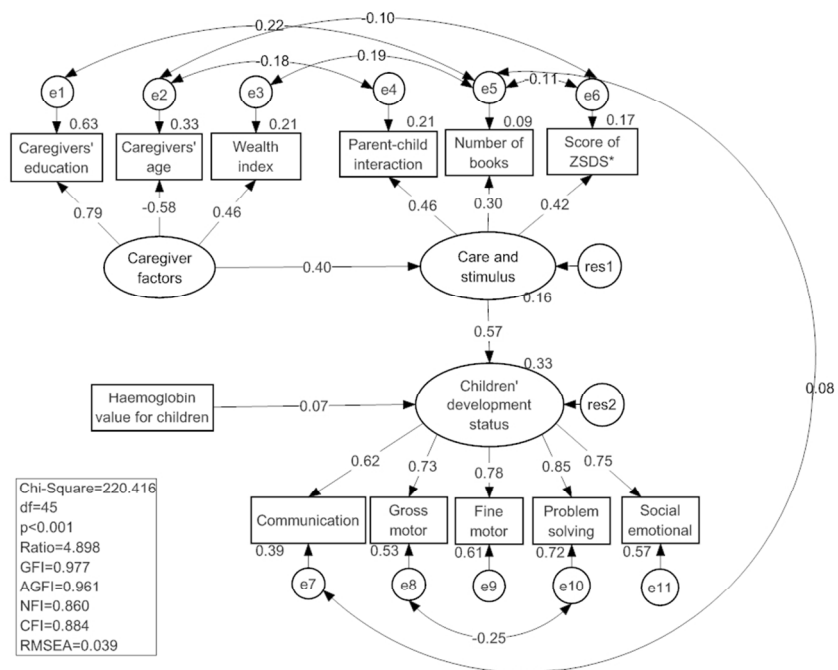

98x67mm (300 x 300 DPI)

## Supplementary 1

Table S1. The squared multiple correlations of variables

| Variables                | Squared multiple correlations |
|--------------------------|-------------------------------|
| Caregivers' education    | 0.631                         |
| Caregivers' age          | 0.331                         |
| Wealth index             | 0.213                         |
| Parent-child interaction | 0.208                         |
| Number of books          | 0.092                         |
| Score of ZSDS            | 0.172                         |
| Communication            | 0.387                         |
| Gross motor              | 0.527                         |
| Fine motor               | 0.605                         |
| Problem solving          | 0.719                         |
| Social emotional         | 0.566                         |

Note: ZSDS: Zung Self-rating Depression Scale

**STROBE 2007 (v4) Statement—Checklist of items that should be included in reports of *cross-sectional studies***

| Section/Topic                | Item # | Recommendation                                                                                                                                                                       | Reported on page # |
|------------------------------|--------|--------------------------------------------------------------------------------------------------------------------------------------------------------------------------------------|--------------------|
| Title and abstract           | 1      | (a) Indicate the study's design with a commonly used term in the title or the abstract                                                                                               | 3                  |
|                              |        | (b) Provide in the abstract an informative and balanced summary of what was done and what was found                                                                                  | 3                  |
| <b>Introduction</b>          |        |                                                                                                                                                                                      |                    |
| Background/rationale         | 2      | Explain the scientific background and rationale for the investigation being reported                                                                                                 | 5-7                |
| Objectives                   | 3      | State specific objectives, including any prespecified hypotheses                                                                                                                     | 7                  |
| <b>Methods</b>               |        |                                                                                                                                                                                      |                    |
| Study design                 | 4      | Present key elements of study design early in the paper                                                                                                                              | 7-8                |
| Setting                      | 5      | Describe the setting, locations, and relevant dates, including periods of recruitment, exposure, follow-up, and data collection                                                      |                    |
| Participants                 | 6      | (a) Give the eligibility criteria, and the sources and methods of selection of participants                                                                                          | 7-8                |
| Variables                    | 7      | Clearly define all outcomes, exposures, predictors, potential confounders, and effect modifiers. Give diagnostic criteria, if applicable                                             | 9-11               |
| Data sources/<br>measurement | 8*     | For each variable of interest, give sources of data and details of methods of assessment (measurement). Describe comparability of assessment methods if there is more than one group |                    |
| Bias                         | 9      | Describe any efforts to address potential sources of bias                                                                                                                            |                    |
| Study size                   | 10     | Explain how the study size was arrived at                                                                                                                                            |                    |
| Quantitative variables       | 11     | Explain how quantitative variables were handled in the analyses. If applicable, describe which groupings were chosen and why                                                         |                    |
| Statistical methods          | 12     | (a) Describe all statistical methods, including those used to control for confounding                                                                                                | 12                 |
|                              |        | (b) Describe any methods used to examine subgroups and interactions                                                                                                                  |                    |
|                              |        | (c) Explain how missing data were addressed                                                                                                                                          |                    |
|                              |        | (d) If applicable, describe analytical methods taking account of sampling strategy                                                                                                   |                    |
|                              |        | (e) Describe any sensitivity analyses                                                                                                                                                |                    |
| <b>Results</b>               |        |                                                                                                                                                                                      |                    |

|                          |     |                                                                                                                                                                                                                                                                                                                                                                                                               |       |
|--------------------------|-----|---------------------------------------------------------------------------------------------------------------------------------------------------------------------------------------------------------------------------------------------------------------------------------------------------------------------------------------------------------------------------------------------------------------|-------|
| Participants             | 13* | (a) Report numbers of individuals at each stage of study—eg numbers potentially eligible, examined for eligibility, confirmed eligible, included in the study, completing follow-up, and analysed<br>(b) Give reasons for non-participation at each stage<br>(c) Consider use of a flow diagram                                                                                                               |       |
| Descriptive data         | 14* | (a) Give characteristics of study participants (eg demographic, clinical, social) and information on exposures and potential confounders<br>(b) Indicate number of participants with missing data for each variable of interest                                                                                                                                                                               | 14    |
| Outcome data             | 15* | Report numbers of outcome events or summary measures                                                                                                                                                                                                                                                                                                                                                          |       |
| Main results             | 16  | (a) Give unadjusted estimates and, if applicable, confounder-adjusted estimates and their precision (eg, 95% confidence interval). Make clear which confounders were adjusted for and why they were included<br>(b) Report category boundaries when continuous variables were categorized<br>(c) If relevant, consider translating estimates of relative risk into absolute risk for a meaningful time period |       |
| Other analyses           | 17  | Report other analyses done—eg analyses of subgroups and interactions, and sensitivity analyses                                                                                                                                                                                                                                                                                                                |       |
| <b>Discussion</b>        |     |                                                                                                                                                                                                                                                                                                                                                                                                               |       |
| Key results              | 18  | Summarise key results with reference to study objectives                                                                                                                                                                                                                                                                                                                                                      | 21-22 |
| Limitations              | 19  | Discuss limitations of the study, taking into account sources of potential bias or imprecision. Discuss both direction and magnitude of any potential bias                                                                                                                                                                                                                                                    | 25-26 |
| Interpretation           | 20  | Give a cautious overall interpretation of results considering objectives, limitations, multiplicity of analyses, results from similar studies, and other relevant evidence                                                                                                                                                                                                                                    | 22-25 |
| Generalisability         | 21  | Discuss the generalisability (external validity) of the study results                                                                                                                                                                                                                                                                                                                                         | 26    |
| <b>Other information</b> |     |                                                                                                                                                                                                                                                                                                                                                                                                               |       |
| Funding                  | 22  | Give the source of funding and the role of the funders for the present study and, if applicable, for the original study on which the present article is based                                                                                                                                                                                                                                                 | 27    |

\*Give information separately for cases and controls in case-control studies and, if applicable, for exposed and unexposed groups in cohort and cross-sectional studies.

**Note:** An Explanation and Elaboration article discusses each checklist item and gives methodological background and published examples of transparent reporting. The STROBE checklist is best used in conjunction with this article (freely available on the Web sites of PLoS Medicine at <http://www.plosmedicine.org/>, Annals of Internal Medicine at <http://www.annals.org/>, and Epidemiology at <http://www.epidem.com/>). Information on the STROBE Initiative is available at [www.strobe-statement.org](http://www.strobe-statement.org).

# BMJ Open

## Factors influencing developmental delay among young children in poor rural China: a latent variable approach

|                                 |                                                                                                                                                                                                                                                                                                                                                                                                                                                                                                                                                                                                                                                                                                                                                                                                                                     |
|---------------------------------|-------------------------------------------------------------------------------------------------------------------------------------------------------------------------------------------------------------------------------------------------------------------------------------------------------------------------------------------------------------------------------------------------------------------------------------------------------------------------------------------------------------------------------------------------------------------------------------------------------------------------------------------------------------------------------------------------------------------------------------------------------------------------------------------------------------------------------------|
| Journal:                        | <i>BMJ Open</i>                                                                                                                                                                                                                                                                                                                                                                                                                                                                                                                                                                                                                                                                                                                                                                                                                     |
| Manuscript ID                   | bmjopen-2018-021628.R1                                                                                                                                                                                                                                                                                                                                                                                                                                                                                                                                                                                                                                                                                                                                                                                                              |
| Article Type:                   | Research                                                                                                                                                                                                                                                                                                                                                                                                                                                                                                                                                                                                                                                                                                                                                                                                                            |
| Date Submitted by the Author:   | 23-Mar-2018                                                                                                                                                                                                                                                                                                                                                                                                                                                                                                                                                                                                                                                                                                                                                                                                                         |
| Complete List of Authors:       | Zhang, Jingxu; Peking University Health Science Centre, Department of Maternal and Child Health; Ministry of Health Key Laboratory of Reproductive Health<br>Guo, Sufang; UNICEF China<br>Li, Ying; Peking University Health Science Centre, Department of Maternal and Child Health<br>Wei, Qianwei; Peking University Health Science Centre, Department of Maternal and Child Health<br>Zhang, Cuihong; Peking University Health Science Centre, Department of Maternal and Child Health<br>Wang, Xiaoli; Peking University Health Science Centre, Department of Maternal and Child Health<br>Luo, Shusheng; Peking University Health Science Centre, Department of Maternal and Child Health<br>Zhao, Chunxia; UNICEF China<br>Scherpbier, Robert; UNICEF China, Health and Nutrition, Water, Environment and Sanitation Section |
| <b>Primary Subject Heading</b>: | Public health                                                                                                                                                                                                                                                                                                                                                                                                                                                                                                                                                                                                                                                                                                                                                                                                                       |
| Secondary Subject Heading:      | Mental health, Research methods                                                                                                                                                                                                                                                                                                                                                                                                                                                                                                                                                                                                                                                                                                                                                                                                     |
| Keywords:                       | Child protection < PAEDIATRICS, Community child health < PAEDIATRICS, Developmental neurology & neurodisability < PAEDIATRICS, PUBLIC HEALTH                                                                                                                                                                                                                                                                                                                                                                                                                                                                                                                                                                                                                                                                                        |
|                                 |                                                                                                                                                                                                                                                                                                                                                                                                                                                                                                                                                                                                                                                                                                                                                                                                                                     |

SCHOLARONE™  
Manuscripts



1  
2  
3  
4 **1 Title Page**  
5  
6  
7

8 **2 Title:** Factors influencing developmental delay among young  
9  
10  
11 children in poor rural China: a latent variable approach  
12  
13

14 **4 Authors:**  
15  
16

17 Jingxu Zhang<sup>1</sup>, Sufang Guo<sup>2</sup>, Ying Li<sup>1</sup>, Qianwei Wei<sup>1</sup>, Cuihong Zhang<sup>1</sup>, Xiaoli Wang<sup>1\*</sup>,  
18 Shusheng Luo<sup>1</sup>, Chunxia Zhao<sup>2</sup>, Robert W. Scherpbier<sup>2</sup>  
19  
20

21 Corresponding author: Xiaoli Wang  
22

23 Postal address: 38 Xueyuan Road, Haidian District, Beijing, China 100191  
24

25 Email address: [xlwang@bjmu.edu.cn](mailto:xlwang@bjmu.edu.cn) (XW)  
26  
27

28 Tel: 86-010-8280-0173  
29  
30

31 **11 Institutional addresses:**  
32  
33

34 <sup>1</sup>Peking University Health Science Center, Department of Maternal and Child Health,  
35 Ministry of Health Key Laboratory of Reproductive Health, 38 Xueyuan Road, Haidian  
36 District, Beijing, China 100191  
37  
38

39 <sup>2</sup>UNICEF China, 12 Sanlitun Road, Chaoyang District, Beijing 100600, China  
40  
41  
42

43 **Email:** Jingxu Zhang (Email: [jxzhang@bjmu.edu.cn](mailto:jxzhang@bjmu.edu.cn)) ; Sufang Guo (Email:  
44  
45

46 [sguo@unicef.org](mailto:sguo@unicef.org)); Ying Li (Email:[loveshanye\\_penny@126.com](mailto:loveshanye_penny@126.com)); Qianwei Wei (Email:  
47  
48

49 [wqianweiai@126.com](mailto:wqianweiai@126.com)); Cuihong Zhang (Email: [chzhang25@gmail.com](mailto:chzhang25@gmail.com)); Xiaoli Wang  
50  
51

52 (Email: [xlwang@bjmu.edu.cn](mailto:xlwang@bjmu.edu.cn)); Shusheng Luo (Email: [luoss@163.com](mailto:luoss@163.com)); Chunxia Zhao  
53  
54

55 (Email: [czhao@unicef.org](mailto:czhao@unicef.org)); Robert W. Scherpbier (Email: [rscherpbier@unicef.org](mailto:rscherpbier@unicef.org))  
56  
57  
58  
59  
60

1  
2  
3 21 **Word Count:** 3958 words.  
4  
5  
6  
7  
8  
9  
10  
11  
12  
13  
14  
15  
16  
17  
18  
19  
20  
21  
22  
23  
24  
25  
26  
27  
28  
29  
30  
31  
32  
33  
34  
35  
36  
37  
38  
39  
40  
41  
42  
43  
44  
45  
46  
47  
48  
49  
50  
51  
52  
53  
54  
55  
56  
57  
58  
59  
60

For peer review only

1  
2  
3  
4 **22 Abstract**

5  
6 **23 OBJECTIVES:** The aims of the study were to determine the prevalence of suspected  
7  
8  
9  
10  
11  
12  
13  
14  
15  
16  
17  
18  
19  
20  
21  
22  
23  
24  
25  
26  
27  
28  
29  
30  
31  
32  
33  
34  
35  
36  
37  
38  
39  
40  
41  
42  
43  
44  
45  
46  
47  
48  
49  
50  
51  
52  
53  
54  
55  
56  
57  
58  
59  
60  
24 developmental delay in children living in poor rural China and to investigate factors  
25 influencing child developmental delay.

26 **DESIGN:** A community-based, cross-sectional survey was conducted.

27 **SERRING:** 83 villages in Shangxi and Guizhou Provinces, China.

28 **PARTICIPANTS:** 2,514 children aged 6-35 months and their first caregivers.

29 **OUTCOMES MEASURES:** Child suspected developmental delay using the Ages & Stages  
30  
31  
32  
33  
34  
35  
36  
37  
38  
39  
40  
41  
42  
43  
44  
45  
46  
47  
48  
49  
50  
51  
52  
53  
54  
55  
56  
57  
58  
59  
60  
30 Questionnaires -Chinese version. Caregivers' education and age, wealth index Infants, child  
31 feeding index, parent-child interaction, number of books and Zung self-rating depression  
32 scale were all primary caregivers reported. Haemoglobin value measured using a calibrated,  
33  
34  
35  
36  
37  
38  
39  
40  
41  
42  
43  
44  
45  
46  
47  
48  
49  
50  
51  
52  
53  
54  
55  
56  
57  
58  
59  
60  
33 automated analyzer. Birth weight obtained from medical record.

34 **RESULTS:** Overall, 35.7% of the surveyed children aged 6-35 months demonstrated  
35  
36  
37  
38  
39  
40  
41  
42  
43  
44  
45  
46  
47  
48  
49  
50  
51  
52  
53  
54  
55  
56  
57  
58  
59  
60  
35 suspected developmental delay. The prevalence of suspected developmental delay was  
36 inversely associated with age, with the prevalence among young children aged 6-11 months  
37 nearly doubling that of children aged 30-35 months (48.0% and 22.8%, respectively). Using a  
38 structural equation model, it was demonstrated that caregiver's care and stimulus factors and  
39 child's hemoglobin level were directly correlated, while caregiver's socio-demographic  
40 factors were indirectly associated with suspected developmental delay.

1  
2  
3  
4 41 CONCLUSIONS: The prevalence of suspected developmental delay is high in poor rural  
5  
6 42 areas of China. Interventions to improve child development are needed in poor rural area of  
7  
8  
9 43 China.

10  
11  
12 44 Key words: suspected Developmental Delay; Infants and young children; Structural equation  
13  
14  
15 45 model; Rural China  
16  
17  
18 46

19  
20  
21 47 **Strengths and limitations of this study**

- 22  
23 48 • This cross-sectional study includes suspected developmental delay among children under  
24  
25  
26 49 3 years of age in poor rural areas of China.  
27  
28  
29 50 • A structural equation model is a good approach to examine the influencing factors on  
30  
31  
32 51 suspected developmental delay.  
33  
34  
35 52 • A few binary variables were not incorporated in the structural equation model because of  
36  
37  
38 53 methodological limitation.  
39

40 54  
41  
42  
43  
44  
45  
46  
47  
48  
49  
50  
51  
52  
53  
54  
55  
56  
57  
58  
59  
60

## 55 INTRODUCTION

56 Developmental delay encompasses a wide spectrum of impairments or lack of developmental  
57 features that are appropriate to the child's age. It may manifest in various aspects, including  
58 motor, mental, language, and social domains[1,2]. Worldwide, developmental delay accounts  
59 for more morbidity across the lifespan than any other chronic conditions[3]. A conservative  
60 estimate is that across the world more than 200 million children under 5 years old failed to  
61 reach their potential in cognitive and social emotional development. As a number of social  
62 factors such as poverty, malnutrition, lack of appropriate care, and child abuse and neglect,  
63 have been identified as potential contributing factors to developmental delay [4],  
64 developmental delay has been a major issue in low and middle-income countries. Moreover,  
65 national statistics on young children's cognitive or social emotional development are not  
66 available for most developing countries. This gap contributes to the invisibility of the issue of  
67 development delay. With a total of 15 million disadvantaged children (defined as stunted,  
68 living in poverty, or both), China has the third largest number of disadvantaged children  
69 globally, following India (65 million) and Nigeria (16 million)[4]. It is clear that  
70 interventions and policies designed to promote child development and prevent or ameliorate  
71 developmental delay are urgently needed as China moves forward.  
72 The pathway between poverty and poor development described by Walker et al is built on the  
73 fact that poverty is associated with inadequate food, and poor access to water, sanitation and

1  
2  
3  
4 74 hygiene [5]. Poverty is also related to poor maternal education, increasing maternal stress,  
5  
6  
7 75 depression, and inadequate stimulation at home. All these factors detrimentally affect child  
8  
9  
10 76 development, and this deprived development may lead to poor school performance and  
11  
12 77 achievement. In addition, poverty and socio-cultural context risk factors may increase young  
13  
14  
15 78 children's exposure to biological and psychosocial risks, and the accumulation in risks often  
16  
17  
18 79 significantly harm child development. Children in developing countries are frequently  
19  
20  
21 80 exposed to multiple and cumulative risks negatively affecting their development, especially  
22  
23  
24 81 through changes in their brain structure and function, and behavioral changes[6].

25  
26 82 Biological risk factors related to young children's developmental delay include infectious  
27  
28  
29 83 disease, chronic malnutrition, iodine deficiency, iron deficiency, anemia, malaria, low birth  
30  
31  
32 84 weight, preterm birth, and exposure to lead or arsenic, etc.[5,7-10].

33  
34  
35 85 Psychological risk factors associated with developmental delay are mainly related to  
36  
37  
38 86 parenting, more specifically, cognitive stimulation, caregiver sensitivity and responsiveness  
39  
40  
41 87 to the child, and caregiver affect in terms of emotional warmth or rejection of the child[5].

42  
43 88 Parents and caregivers can play an important role in providing the child with a healthy, safe  
44  
45  
46 89 and caring environment[11].

47  
48  
49 90 The effects of these biological and psychological risk factors are sensitive to contextual  
50  
51  
52 91 factors such as poverty and maternal depression[5]. Common mental disorders, including  
53  
54  
55 92 depression and anxiety among women during pregnancy, or in the first post-partum year, are

1  
2  
3  
4 93 recognized as a public health issue globally. There are emerging evidence show that maternal  
5  
6 94 mental disorders have adverse impacts on physical and psychological development of fetuses  
7  
8  
9 95 and infants[12-18].  
10  
11  
12 96 To sum up, various social, biological and psychological factors may contribute to child  
13  
14  
15 97 developmental delay. The existing evidence indicated that four major risk factors affect at  
16  
17  
18 98 least 20–25% of children in developing countries[5]: inadequate cognitive stimulation,  
19  
20  
21 99 stunting, iron deficiency, and iodine deficiency. There is a paucity of data on the prevalence  
22  
23  
24 100 and risk factors for developmental delay in China, especially in poor rural areas where  
25  
26  
27 101 children are at high risk for developmental delay due to the economic and social restraints. In  
28  
29  
30 102 addition, although the influencing factors on child developmental delay have been widely  
31  
32  
33 103 studied, the relationships among these factors and their direct and indirect associations with  
34  
35  
36 104 the development outcome were seldom examined in the existing literature. Comparing to  
37  
38  
39 105 mostly commonly used methods such as linear or logistic regression, a structural equation  
40  
41  
42 106 model could effectively control measurement error [19]. More importantly, structural  
43  
44  
45 107 equation model could tackle multiple dependent variables simultaneously and examine the  
46  
47  
48 108 relationships between dependent variables and independent variables at the same time  
49  
50  
51 109 without adjusting confounders. Especially, the structural equation model can explore the  
52  
53  
54 110 direct, indirect and total effects of multiple factors as mentioned above on child  
55  
56  
57 111 developmental delay, which will provide a latent variable approach. The goals of this study

1  
2  
3  
4 112 were to determine the prevalence of developmental delay in young children in rural China  
5  
6  
7 113 and to explore factors contributing to child developmental delay.  
8

9 114 **METHOD**

10  
11  
12 115 **Participants and Design**

13  
14  
15 116 A community-based cross-sectional survey on child health, nutrition and development was  
16  
17  
18 117 conducted between July and September 2013 in remote mountainous areas of Shanxi and  
19  
20  
21 118 Guizhou provinces, located in the central and south-west regions of China respectively. The  
22  
23  
24 119 survey sites were the project sites of the Integrated Early Childhood Development (IECD)  
25  
26  
27 120 Project funded by UNICEF. A total of 83 villages were selected from six counties of the two  
28  
29  
30 121 provinces based on the following criteria: 1) having at least 50 children under 3 years old; 2)  
31  
32 122 having a township health center staffed with maternal and child health professionals; 3)  
33  
34  
35 123 reachable by vehicles. All the children under 3 years and their primary caregivers (defined as  
36  
37  
38 124 person(s) who take primary responsibility for taking care of child in the family) in the chosen  
39  
40  
41 125 villages were eligible for the study. Altogether, 2,953 children out of the 4,288 children in the  
42  
43  
44 126 83 villages participated in the study and their primary caregivers finished the survey. The  
45  
46  
47 127 response rate was 68.9%. All caretakers provided their written informed consent to  
48  
49  
50 128 participate in this study. The study was reviewed and approved by Peking University  
51  
52 129 Biomedical Ethics Committee.  
53  
54  
55 130 For this analysis, children with hearing disabilities (e.g., deaf children) (n=16) were excluded  
56



1  
2  
3  
4 131 because the disabilities may directly affect their performance. In addition, we excluded  
5  
6 132 children aged 1-5 months (n=326) because their hemoglobin values were not tested; children  
7  
8  
9 133 with implausible hemoglobin values (n =1, Hb =225 g/L ); and respondents who were not  
10  
11  
12 134 primary caregivers (n =96). Therefore, the final sample size for this analysis was 2,514  
13  
14  
15 135 children.

### 18 136 **Patient and Public Involvement**

20 137 At survey day, children under 3 years old and their caregivers in the village were recruited  
21  
22  
23 138 and conducted. The research questions were interviewed face-to-face and children growth,  
24  
25  
26 139 Haemoglobin value and development were measured after interview. The status of growth,  
27  
28  
29 140 anemia and development were disseminated to the caregivers immediately.

### 32 141 **Study Instruments**

#### 35 142 *Outcome measure : Child developmental delay measurement*

37 143 The Ages & Stages Questionnaires -Chinese version (ASQ-C), which was validated recently  
38  
39  
40 144 in Chinese, was used to assess children's development status [20].ASQ-C includes various  
41  
42  
43 145 dimensions, including communication, gross motor, fine motor , problem solving and  
44  
45  
46 146 personal-social [21]. Each of the domains contains six sub-items. The responses of 'yes',  
47  
48  
49 147 'sometimes', or 'not yet' were given scores of 10, 5, and 0 points, respectively. Development  
50  
51  
52 148 delay in a certain domain was defined as if domain score was lower than 2SD (Standard  
53  
54  
55 149 Deviation) of the cutoff point in the normative norm in that domain. Overall suspected

1  
2  
3  
4 150 development delay was defined as if there was delay in any one of five domains of ASQ,  
5  
6  
7 151 including communication, gross motor, fine motor, problem solving, and personal-social  
8  
9  
10 152 domain. The latent variable of children's developmental status was measured by five  
11  
12 153 dimensions of ASQ-C in this study.

14  
15 154 *Social, biological and psychological factors*

16  
17  
18 155 Household survey questionnaire

19  
20 156 A face-to-face interview was conducted with the child caregivers using a structured  
21  
22  
23 157 questionnaire developed based on UNICEF's 5th Multiple Indicator Cluster Survey (MICS5).  
24  
25  
26 158 The questionnaire contained questions on the household socioeconomic status, family  
27  
28  
29 159 structure, health and development of children under five years old and their mother in the  
30  
31  
32 160 household. Wealth index was developed based on the number of household appliances  
33  
34  
35 161 (telephone, TV, washing machine, refrigerator, and internet connection).

36  
37  
38 162 Zung self-rating depression scale (ZSDS)

39  
40 163 The Zung Self-rating Depression Scale (ZSDS), validated and widely utilized in China[22-  
41  
42  
43 164 24], was used to assess caregivers' mental health status. The scale comprises 20 items and  
44  
45  
46 165 each question is scored on a scale of 1-4 based on the following responses: never or rarely,  
47  
48  
49 166 sometimes, most of the time, or always. A score between 50 and 69 indicates depression, and  
50  
51  
52 167 a score of 70 or above indicates severe depression. In this study, caregivers with a score of 50  
53  
54  
55 168 or more were identified as positive for depression [25].

1  
2  
3  
4 169 A modified infants and child feeding index (ICFI)  
5  
6  
7 170 A modified infant and child feeding index (ICFI) was constructed on the basis of current  
8  
9  
10 171 feeding practices for infants and young children recommended by WHO[26] and proposed by  
11  
12 172 Ruel and Menon[27] and was used to gather information on current feeding practices of  
13  
14  
15 173 surveyed children. This modified ICFI was based on a dietary recall of the past 24 hours from  
16  
17  
18 174 a questionnaire and it includes practices related to breastfeeding, bottle feeding, feeding  
19  
20  
21 175 frequency and food diversity given to the children prior to the survey being conducted. To  
22  
23  
24 176 take into account the age specific feeding recommendations, the modified ICFI was compiled  
25  
26  
27 177 separately for three age groups: 6-8 months, 9-11 months and 12-35 months. A score of 2  
28  
29 178 was added if the child was breastfed; 1 point added if the child had never been bottle-fed; 2  
30  
31  
32 179 points added if the child's feeding frequency met the recommendation; and 1 point if the  
33  
34  
35 180 feeding frequency was below the recommendation but above zero. Dietary diversity of food  
36  
37  
38 181 groups refers to the number of different food groups provided to the child. Altogether 7 food  
39  
40  
41 182 groups were counted, and a score of +2 was added if 4 or more food groups were consumed,  
42  
43  
44 183 and a score of +1 was added if 1 to 3 food groups were consumed.

#### 45 184 Parent-child interaction

46  
47  
48  
49 185 The level of parent-child interaction was assessed based on the following six activities that  
50  
51  
52 186 caregivers did with their child: 1) reading books to the child, 2) telling stories to the child, 3)  
53  
54  
55 187 singing songs to or with the child, 4) taking the child outdoor, 5) playing toys with the child,  
56

1  
2  
3  
4 188 and 6) naming, counting or drawing things to promote learning with the child. If one of the  
5  
6 189 above mentioned behaviors were reported by the caregivers, +1 score was given, with the  
7  
8  
9 190 highest possible score of +6.

11  
12 191 Haemoglobin value

13  
14  
15 192 Trained staff collected capillary blood sample from the child and measured their hemoglobin  
16  
17  
18 193 (Hb) concentration using a calibrated, automated analyzer (HemoCue 201 [HemoCue,  
19  
20 194 Angelholm, Sweden]). Anemia is defined as a hemoglobin concentration <110 g/L, based on  
21  
22  
23 195 the global definition for preschool children and adjusted for altitude[28]. Children with  
24  
25  
26 196 anemia were referred to an appropriate health facility for treatment.

27  
28  
29 197 Anthropometric measurements

30  
31  
32 198 Birth weight was obtained from medical record.

33  
34  
35 199 In this part, the latent variable, caregiver factor, was measured by caregivers' education,  
36  
37  
38 200 caregivers' age and wealth index. Care and stimulus was measured by parent-child  
39  
40  
41 201 interaction, number of books and score of ZSDS.

## 42 43 202 **Data Analysis**

44  
45  
46 203 Data analysis was performed using SPSS for Windows (version 16.0, SPSS Inc., Chicago, IL,  
47  
48  
49 204 USA). Descriptive statistics were provided as median, range and interquartile range for  
50  
51  
52 205 continuous variables and count and percentage for categorical variables. A structural  
53  
54  
55 206 equation model (Amos 20 for Windows, IBM, Armonk, NY, USA) was used to test if the

207 hypothetical explanatory model fits the observed data and to apply the asymptotically  
 208 distribution-free estimate. The hypothetical explanatory model was derived from literature  
 209 [4,5]and the univariate regression result. The assignment rules and explanation of variables in  
 210 the structural equation model are described in Table 1. The model was modified according to  
 211 statistics suggested by the modification index in Amos. An absolute value of  $\geq 1.96$  ( $p \leq 0.05$ )  
 212 for the standardized  $\beta$ -coefficient T was considered significant. Goodness of fit index (GFI),  
 213 normal fit index (NFI), comparative fit index (CFI) and root mean squared error of  
 214 approximation (RMSEA) were used to test model fit. For GFI, CFI and NFI, 1 means a  
 215 perfect fit while  $>0.9$  indicates an adequate fit. For RMSEA,  $<0.05$  indicates a good model.  
 216 Chi-square statistic to test the null hypothesis was not required as the sample size  
 217 was  $>1000$ [29].

218 Table 1. Assignment rules and explanation of variables in structural equation model

| Variables             | assignment rules or explanation                                                                                       |
|-----------------------|-----------------------------------------------------------------------------------------------------------------------|
| caregiver's education | illiteracy,+1<br>primary school,+2<br>junior high school,+3<br>senior high school and above,+4                        |
| caregiver's age       | caregiver's integer age                                                                                               |
| wealth index          | numbers of accessories including phone(telephone or mobile),washing machine, refrigerator, TV set, access to Internet |

---

|    |                                |                                                                                                                                                                                                        |
|----|--------------------------------|--------------------------------------------------------------------------------------------------------------------------------------------------------------------------------------------------------|
| 1  |                                |                                                                                                                                                                                                        |
| 2  |                                |                                                                                                                                                                                                        |
| 3  |                                |                                                                                                                                                                                                        |
| 4  |                                |                                                                                                                                                                                                        |
| 5  | parent-child interaction       | 6 behaviors including read books to child, told stories, sang songs, took child outside the home, played with child, and named, counted or drew things to promote learning would form stimulus signals |
| 6  |                                |                                                                                                                                                                                                        |
| 7  |                                |                                                                                                                                                                                                        |
| 8  |                                |                                                                                                                                                                                                        |
| 9  |                                |                                                                                                                                                                                                        |
| 10 | numbers of books               | numbers of books children owned presently                                                                                                                                                              |
| 11 |                                |                                                                                                                                                                                                        |
| 12 |                                |                                                                                                                                                                                                        |
| 13 | score of ZSDS                  | reversed score of caregiver's depression assessed by the Zung Self-rating Depression Scale                                                                                                             |
| 14 |                                |                                                                                                                                                                                                        |
| 15 |                                |                                                                                                                                                                                                        |
| 16 |                                |                                                                                                                                                                                                        |
| 17 |                                | Breastfeeding:                                                                                                                                                                                         |
| 18 |                                |                                                                                                                                                                                                        |
| 19 |                                | 6-9 mo: No=0; Yes= +2;                                                                                                                                                                                 |
| 20 |                                |                                                                                                                                                                                                        |
| 21 |                                | 9-11 mo: No=0; Yes=+2;                                                                                                                                                                                 |
| 22 |                                |                                                                                                                                                                                                        |
| 23 |                                | 12-35 mo: No=0; Yes=+1.                                                                                                                                                                                |
| 24 |                                |                                                                                                                                                                                                        |
| 25 |                                | Bottle feeding: Yes=0; No=+1;                                                                                                                                                                          |
| 26 | modified ICFI                  |                                                                                                                                                                                                        |
| 27 |                                | Feeding frequency:                                                                                                                                                                                     |
| 28 |                                |                                                                                                                                                                                                        |
| 29 |                                | 6-9 mo: 0 meal = 0; 1 meal = +1; 2 meals or more = +2;                                                                                                                                                 |
| 30 |                                |                                                                                                                                                                                                        |
| 31 |                                | 9-11 mo: 0 meal = 0; 1-2 meals = +1; 3 meals or more = +2;                                                                                                                                             |
| 32 |                                |                                                                                                                                                                                                        |
| 33 |                                | 12-35 mo: 0-1 meals = 0; 2-3 meals = +1; 4 meals or more = +2;                                                                                                                                         |
| 34 |                                |                                                                                                                                                                                                        |
| 35 |                                | Dietary diversity: 0 group = 0; 1-3 groups = +1; 4 or more groups = +2                                                                                                                                 |
| 36 |                                |                                                                                                                                                                                                        |
| 37 | birth weight                   | birth weight of child (medical records or parental report)                                                                                                                                             |
| 38 |                                |                                                                                                                                                                                                        |
| 39 | haemoglobin value for children | haemoglobin value we tested                                                                                                                                                                            |
| 40 |                                |                                                                                                                                                                                                        |
| 41 | Communication                  | score of communication assessed by ASQ                                                                                                                                                                 |
| 42 |                                |                                                                                                                                                                                                        |
| 43 | gross motor                    | score of gross motor assessed by ASQ                                                                                                                                                                   |
| 44 |                                |                                                                                                                                                                                                        |
| 45 | fine motor                     | score of fine motor assessed by ASQ                                                                                                                                                                    |
| 46 |                                |                                                                                                                                                                                                        |
| 47 | problem solving                | score of problem solving assessed by ASQ                                                                                                                                                               |
| 48 |                                |                                                                                                                                                                                                        |
| 49 |                                |                                                                                                                                                                                                        |
| 50 | Personal-social                | score of personal-social assessed by ASQ                                                                                                                                                               |
| 51 |                                |                                                                                                                                                                                                        |

---

219 Note: ZSDS: Zung Self-rating Depression Scale; ICFI: infant and young child feeding index

220

1  
2  
3  
4 221 **RESULTS**

5  
6 222 **Demographic, Socio-economic Characteristics of Participants**

7  
8  
9 223 About 21.0% of children surveyed were 6-11 months, while 41.1% were 12-23 months, and  
10  
11  
12 224 37.9% were 24-35 months. Slightly more boys were included in the survey than girls (56.8%  
13  
14  
15 225 versus 43.2%, respectively) (Table 2). About half (47.9%) were the firstborn children and  
16  
17  
18 226 11.4% were left-behind children (i.e. their parents are migrant workers who leave rural areas  
19  
20  
21 227 for the cities while leaving children behind in their hometowns). More than one-third (35.5%)  
22  
23  
24 228 were ethnic minority children. Most of the caregivers interviewed (79.6%) were mothers. The  
25  
26  
27 229 average age of caregivers was 30.19 years with a standard deviation (SD) of 9.71 years; a  
28  
29  
30 230 majority (62.1%) of caregivers interviewed aged 20-29 years. Most (63.5%) had completed  
31  
32  
33 231 at least 9 years of education (i.e. secondary education). Among the surveyed households,  
34  
35  
36 232 51% lived under the national poverty line of US\$1 per day and 45% lived more than 5  
37  
38  
39 233 kilometers to the nearest health facilities.

40 234 Table 2. Sociodemographic and clinical characteristics of sampled child-caregiver pairs (N=2514)

|           | N    | %    |                        | N    | %    |
|-----------|------|------|------------------------|------|------|
| Child age |      |      | Caregivers interviewed |      |      |
| 6-11      | 528  | 21.0 | Mother                 | 2002 | 79.6 |
| 12-23     | 1034 | 41.1 | Father                 | 189  | 7.5  |
| 24-35     | 952  | 37.9 | Grandparents           | 320  | 12.7 |

|                      |      |      |                             |      |      |
|----------------------|------|------|-----------------------------|------|------|
| Child gender         |      |      | Others                      | 3    | 0.1  |
| Male                 | 1427 | 56.8 | Caregivers' age             |      |      |
| Female               | 1087 | 43.2 | <20                         | 42   | 1.7  |
| Having elder sibling |      |      | 20-                         | 1561 | 62.1 |
| Yes                  | 1277 | 50.8 | 30-                         | 539  | 21.4 |
| No                   | 1203 | 47.9 | 40-                         | 349  | 13.9 |
| Unknown              | 34   | 1.4  | Unknown                     | 23   | 0.9  |
| Left-behind children |      |      | Caregivers' education       |      |      |
| Yes                  | 286  | 11.4 | Illiteracy                  | 256  | 10.2 |
| No                   | 2228 | 88.6 | Primary education           | 661  | 26.3 |
| Ethnicity            |      |      | Secondary                   | 1277 | 50.8 |
| Han                  | 1621 | 64.5 | Above secondary             | 320  | 12.7 |
| Minority             | 893  | 35.5 | Distance to health facility |      |      |
|                      |      |      | <5km                        | 1345 | 53.5 |
|                      |      |      | ≥5km                        | 1131 | 45.0 |
|                      |      |      | Unknown                     | 38   | 1.5  |

235

236 **Suspected Developmental Delay among Children under 3 Years Old**



237 Overall, 35.7% of the surveyed children under 3 years of age had suspected developmental  
 238 delay (Table 3). Across all age groups, prevalence of suspected developmental delay was  
 239 inversely associated to the child's age, with the highest rate (48.0%) among children aged 6-  
 240 11 months and lowest (22.8%) among children aged 30-35 months. Across all domains, delay  
 241 in communication was the lowest (8.9%) and delay in fine motor was the highest (20.6%),  
 242 while other domains ranged from 15.1% to 16.7%.

243 Table 3. Prevalence of child suspected development delay

|                                  | 6-months  | 12-months | 18-months | 24-months | 30-months | Total     |
|----------------------------------|-----------|-----------|-----------|-----------|-----------|-----------|
|                                  | n(%)      | n(%)      | n(%)      | n(%)      | n(%)      | n(%)      |
|                                  | N=538     | N=473     | N=561     | N=517     | N=435     | N=2514    |
| suspected<br>Developmental delay | 258(48.0) | 210(44.4) | 207(36.9) | 123(23.8) | 99(22.8)  | 897(35.7) |
| Delay in subscales:              |           |           |           |           |           |           |
| Communication                    | 92(17.4)  | 46(9.7)   | 46(8.2)   | 22(4.3)   | 18(4.1)   | 224(8.9)  |
| Grass motor                      | 107(20.3) | 85(18.0)  | 83(14.8)  | 61(11.8)  | 44(10.1)  | 380(15.1) |
| Fine motor                       | 157(29.7) | 145(30.7) | 144(25.7) | 50(9.7)   | 23(5.3)   | 519(20.6) |
| Problem solving                  | 98(18.6)  | 131(27.7) | 84(15.0)  | 50(9.7)   | 56(12.9)  | 419(16.7) |
| Personal-Social                  | 102(19.3) | 92(19.5)  | 96(17.1)  | 63(12.2)  | 52(12.0)  | 405(16.1) |

244

245 **Social, biological and psychological factors**

1  
2  
3  
4 246 The wealth index in the surveyed families ranged from 0 to 5, with a median of 4, indicating  
5  
6  
7 247 that most of the families owned major appliances. The parent-child interaction scores ranged  
8  
9  
10 248 from 0 to 6, with a median score of 6. On average, the surveyed children owned only 1 book  
11  
12 249 (median=1, IQR=3). Caregivers' ZSDS in this survey ranged from 38 to 80, with a median  
13  
14  
15 250 score of 63.76. Nearly two-fifths of caregivers (38.5%) had symptoms of depression. The  
16  
17  
18 251 ICFI ranged from 0 to 7, with a median score of 2. The hemoglobin values for the surveyed  
19  
20  
21 252 children were 51 to 178 g/L, with a median of 110 g/L. Anemia prevalence was high at  
22  
23  
24 253 43.8%. Birth weight of the surveyed children ranged from 1.40 to 6.00 kilograms, with a  
25  
26  
27 254 median of 3.30 kilograms; 2.9% had low birth weight (i.e. birth weight less than 2.5 kg) .  
28  
29

### 30 256 **Structural Equation Model for Children's Developmental Delay**

31  
32  
33 257 About half of the squared multiple correlation of variables were more than 0.50 (Table S1),  
34  
35  
36 258 which indicated that the variables had a good reliability. In the final structural equation  
37  
38  
39 259 model (shown in Table 4), modified ICFI and birth weight were excluded from the model,  
40  
41  
42 260 because of lack of statistically significant relationships with other variables. Figure 1 shows  
43  
44  
45 261 the estimated covariance and paths for this model. Three factors influencing children's  
46  
47  
48 262 developmental status were identified: 1) caregiver socio-demographic factors such as  
49  
50  
51 263 caregiver's education, age, and wealth index (total effect =0.23 on child developmental  
52  
53  
54 264 status); 2) care and stimulus factors measured by parent-child interaction, number of books  
55  
56  
57 265 and ZSDS score (direct effect= 0.57); and 3) child's hemoglobin level (direct effect= 0.07).

1  
2  
3  
4 266 Younger caregivers were more likely to interact with children than older caregivers  
5  
6 267 (covariance of residuals =-0.18) and the latent variable- caregiver factors-had a direct positive  
7  
8  
9 268 effect on ‘care and stimulus factors’ (path coefficient=0.40) and an indirect positive effect on  
10  
11  
12 269 children’s developmental status. The overall model fit was good as reflected by the goodness  
13  
14  
15 270 of fit index of 0.977 and the comparative fit index of 0.884.  
16  
17  
18  
19  
20  
21  
22  
23  
24  
25  
26  
27  
28  
29  
30  
31  
32  
33  
34  
35  
36  
37  
38  
39  
40  
41  
42  
43  
44  
45  
46  
47  
48  
49  
50  
51  
52  
53  
54  
55  
56  
57  
58  
59  
60

For peer review only

271 Table 4. Regression weights of structural equation model

| Equation                                                            | Estimates<br>(unstandardized) | Estimates<br>(Standardized) | Standard<br>Error | Critical<br>ratio | P<br>value |
|---------------------------------------------------------------------|-------------------------------|-----------------------------|-------------------|-------------------|------------|
| Regression weights                                                  |                               |                             |                   |                   |            |
| Care and stimulus ← caregiver factor                                | 0.402                         | 0.401                       | 0.047             | 8.497             | <0.001     |
| Children's developmental status ← care and stimulus                 | 9.608                         | 0.573                       | 0.913             | 10.525            | <0.001     |
| Children's developmental status ← haemoglobin value<br>for children | 0.593                         | 0.071                       | 0.178             | 3.331             | 0.001      |
| Caregivers' education ← caregiver factor                            | 1.000                         | 0.794                       |                   |                   |            |
| Caregivers' age ← caregiver factor                                  | -8.358                        | -0.576                      | 0.543             | -15.380           | <0.001     |
| Wealth index ← caregiver factor                                     | 0.775                         | 0.461                       | 0.055             | 14.163            | <0.001     |
| parent-child interaction ← care and stimulus                        | 1.000                         | 0.456                       |                   |                   |            |
| Numbers of books ← care and stimulus                                | 1.687                         | 0.303                       | 0.220             | 7.678             | <0.001     |
| Score of ZSDS ← care and stimulus                                   | 4.856                         | 0.415                       | 0.488             | 9.944             | <0.001     |
| Communication ← Children's developmental status                     | 0.863                         | 0.622                       | 0.029             | 30.054            | <0.001     |
| Gross motor ← Children's developmental status                       | 0.970                         | 0.726                       | 0.030             | 32.608            | <0.001     |
| Fine motor ← Children's developmental status                        | 1.132                         | 0.778                       | 0.028             | 40.216            | <0.001     |

|    |                                                   |         |        |       |        |        |
|----|---------------------------------------------------|---------|--------|-------|--------|--------|
| 1  |                                                   |         |        |       |        |        |
| 2  |                                                   |         |        |       |        |        |
| 3  |                                                   |         |        |       |        |        |
| 4  |                                                   |         |        |       |        |        |
| 5  | Problem solving ← Children's developmental status | 1.188   | 0.848  | 0.030 | 40.212 | <0.001 |
| 6  |                                                   |         |        |       |        |        |
| 7  | Personal-social ← Children's developmental status | 1.000   | 0.752  |       |        |        |
| 8  |                                                   |         |        |       |        |        |
| 9  | Covariance                                        |         |        |       |        |        |
| 10 |                                                   |         |        |       |        |        |
| 11 | e8 ↔ e10                                          | -19.912 | -0.248 | 2.961 | -6.725 | <0.001 |
| 12 |                                                   |         |        |       |        |        |
| 13 | e3 ↔ e5                                           | 0.620   | 0.188  | 0.064 | 9.708  | <0.001 |
| 14 |                                                   |         |        |       |        |        |
| 15 | e2 ↔ e4                                           | -1.695  | -0.175 | 0.270 | -6.290 | <0.001 |
| 16 |                                                   |         |        |       |        |        |
| 17 | e1 ↔ e5                                           | 0.364   | 0.215  | 0.051 | 7.136  | <0.001 |
| 18 |                                                   |         |        |       |        |        |
| 19 | e5 ↔ e7                                           | 3.079   | 0.076  | 0.680 | 4.527  | <0.001 |
| 20 |                                                   |         |        |       |        |        |
| 21 | e5 ↔ e6                                           | -2.709  | -0.115 | 0.575 | -4.712 | <0.001 |
| 22 |                                                   |         |        |       |        |        |
| 23 | e2 ↔ e6                                           | -5.270  | -0.100 | 1.247 | -4.228 | <0.001 |
| 24 |                                                   |         |        |       |        |        |

272

Note: ZSDS: Zung Self-rating Depression Scale

1  
2  
3  
4 273 **DISCUSSION**

5  
6 274 Our results showed that the prevalence of suspected developmental delay among children  
7  
8  
9 275 aged 6-35 months was high and inversely associated with children's age in poor rural China.  
10  
11  
12 276 Furthermore, by using the structural equation model, some risk factors for children's  
13  
14  
15 277 suspected development delay and their relationship were identified. So far only one study  
16  
17  
18 278 examined developmental delay in rural China and reported a prevalence of 20.0% in  
19  
20  
21 279 cognitive development and 32.3% in psychomotor development among children aged 6-12  
22  
23  
24 280 months[30]. Our study revealed that 35.7% of rural children under 3 years of age had  
25  
26  
27 281 suspected developmental delay and that among children aged 6-12 months, 17-20% of them  
28  
29  
30 282 had delay in communication, problem solving, personal-social and gross motor, and nearly  
31  
32  
33 283 30% had delay in final motor development. Overall the prevalence observed in our study was  
34  
35  
36 284 comparable to the results from the previous study. According to the very limited data from  
37  
38  
39 285 the WHO report[31], the reported prevalence of developmental delay in young children was  
40  
41  
42 286 17% in Senegal, 15% in Nigeria, 13% in India, and 24% in Brazil. The lower prevalence  
43  
44  
45 287 reported by other developing countries may reflect the underestimated rates and inaccurate  
46  
47  
48 288 measurement of developmental delay. Promoting early childhood development (ECD) is a  
49  
50  
51 289 critical issue. It is recommended that government and healthcare providers should pay more  
52  
53  
54 290 attention to early diagnosis and intervention of developmental delay. Among the five  
55  
56  
57  
58  
59  
60

1  
2  
3  
4 291 domains of ASQ, suspected developmental delay of fine motor had the highest prevalence.  
5

6 292 This is a key finding that requires further intervention in poor rural areas of China.  
7  
8

9 293 It was found in the structural equation model that caregiver factor, care and stimulus factor  
10

11 294 and hemoglobin values of children were directly or indirectly associated with suspected  
12

13 295 developmental delay. These findings indicate potential areas that future intervention  
14

15 296 programs should focus on, including improving child's feeding and nutrition, raising public  
16

17 297 awareness of the issue of developmental delay, and improving parenting skills to increase  
18

19 298 interaction with children.  
20

21 299  
22

### 23 300 **Relations between caregiver factors and child development**

24  
25  
26  
27

28 301 Our results showed that younger caregivers with higher education level and wealth index had  
29

30 302 an indirect, positive effect on their child's development. Previous studies have investigated  
31

32 303 the relations between caregivers' socio-demographic factors and child development. In a  
33

34 304 population-based study in Argentina and a cohort study in Brazil, it was found that poverty  
35

36 305 and maternal education were positively associated with early attainment of selected  
37

38 306 developmental milestones or cognitive and motor development [32,33]. Another report also  
39

40 307 indicated that parenting cognitive stimulation, caregiver's responsiveness, and caregiver's  
41

42 308 affect are sensitive to contextual factors such as poverty, cultural values and practices[5]. The  
43

44 309 findings from our study are consistent with these previous results. In addition, our study  
45

46 310 revealed that caregiver factor were indirect predictors of their child's development delay.  
47  
48  
49

1  
2  
3  
4 311 Although caregiver factor had no direct effect on their child's developmental status, these  
5  
6 312 factors such as caregivers' education, age and poverty level may impact other factors  
7  
8  
9 313 therefore indirectly affecting developmental delay. More attention should be paid to change  
10  
11  
12 314 these contextual factors when designing future interventions to improve children's  
13  
14  
15 315 development and health.

16  
17 316

### 18 19 317 **Relations between care and stimulus factors and child development**

20  
21  
22 318 The current study revealed that the most important predictor on child's suspected  
23  
24  
25 319 developmental delay was care and stimulus factors (path coefficient=0.57). Better parent-  
26  
27  
28 320 child interaction, more books and less maternal depression had positive effect on child  
29  
30  
31 321 development. Children who had one score point increase on care and stimulus factors had  
32  
33  
34 322 0.57 score increase on child development. The findings of the current study were consistent  
35  
36  
37 323 with previous studies showing the protective effect of parent-child interaction, children's  
38  
39  
40 324 books and optimistic caregivers on child development[34]. Thus, it is necessary to promote  
41  
42  
43 325 parent-child interactions, through encouraging activities such as reading books to their child,  
44  
45  
46 326 telling stories to their child, singing songs to and with their child, bringing their child to play  
47  
48  
49 327 outdoors, playing toys with their child, and naming, counting or drawing things to promote  
50  
51  
52 328 learning that would form stimulus signals[5,35,36]. Depression among caregivers was also  
53  
54  
55 329 alarmingly high in our study sample, confirming findings from previously published studies  
56  
57  
58 330 [37,38]. Our results also found caregivers with depression had increased risk on adverse



1  
2  
3  
4 331 effects on child development[17,39]. The previously published studies have shown  
5  
6 332 depression among caregivers not only impact children's physical health, but also place  
7  
8  
9 333 children at a higher risk of developmental delay[40,41]. It is well-established that maternal  
10  
11  
12 334 depression during the period that the mother–infant interaction was observed (concurrent or  
13  
14  
15 335 recent maternal depression) was associated with reduced maternal responsiveness, which was  
16  
17  
18 336 positively associated with later emotional, cognitive and physical development of the  
19  
20  
21 337 infant[42,43]. Our study revealed a latent variable, care and stimulus factors that include  
22  
23  
24 338 caregiver depression scores and parent-child interaction scores, had a comprehensive impact  
25  
26  
27 339 on child development. Accordingly, these findings suggest an urgent need for child  
28  
29 340 development interventions on children's care and stimulus factors in poor rural China.  
30

31 341

### 32 33 342 **Relations between Hb values and child development**

34  
35  
36 343 Our study found hemoglobin values of children had a positive effect on child development.  
37  
38  
39 344 Other biological factors, such as birth weight of children and modified ICFI did not predict  
40  
41  
42 345 child development, which was not consistent with previous research[5]. A possible  
43  
44  
45 346 explanation might be that in our structural equation model, only continuous variables were  
46  
47  
48 347 involved and three variables in our study could not be converged as one latent variable, and  
49  
50  
51 348 each variable had poor correlations with the other two variables. Anemia among children was  
52  
53  
54 349 alarmingly high in our sample, confirming findings from a previous published study[44].  
55  
56 350 These findings point to a severe public health problem[45], and provide further evidence on  
57  
58  
59

1  
2  
3  
4 351 anemia's negative impact on child growth and development[4,5,46]. Our survey found that  
5  
6  
7 352 the hemoglobin value of children had a positive effect on child development. On the positive  
8  
9  
10 353 side, the Chinese government has realized this public health issue and has started providing  
11  
12 354 micronutrient supplements named "Ying Yang Bao (YYB)" to 6-35 month old children living  
13  
14  
15 355 in poor rural areas free of charge. It is expected that this nutrition intervention program will  
16  
17  
18 356 decrease child anemia effectively. Although the current study did not find that birth weight  
19  
20  
21 357 and modified ICFI are associated with child development, it is known that poor maternal  
22  
23  
24 358 nutrition, infections and child feeding practices can impact child nutrition and development.  
25  
26  
27 359 Therefore, these areas still need to be monitored and improved through government  
28  
29  
30 360 interventions in poor rural China.

31  
32 361

### 33 362 **Limitations**

34  
35  
36 363 Our study had several limitations that should be discussed and considered. First, as a cross-  
37  
38  
39 364 sectional study, the associations identified in our study do not suggest a causal relationship  
40  
41  
42 365 between these factors and child's suspected developmental delay. Although the structured  
43  
44  
45 366 equation model is a powerful statistical technique for simultaneous consideration of the  
46  
47  
48 367 multiple variables measured, further evidence from cohort studies and interventional studies  
49  
50  
51 368 is needed to infer causal relationship. Second, because of the restrictions and limitations on  
52  
53  
54 369 structural equation model methodology and the software, many binary variables were not  
55  
56  
57 370 incorporated in the structural equation model, especially the variables measuring infant and

1  
2  
3  
4 371 young child infections such as diarrhea and pneumonia. Third, this study was conducted in  
5  
6 372 two provinces located in central and south-west regions of China. These study sites cannot  
7  
8  
9 373 represent all poor rural areas of China. Caution is warranted when generalizing findings from  
10  
11  
12 374 our studies to rural areas in China.

### 15 375 **Conclusions**

17 376 These preliminary findings indicated that the prevalence of suspected developmental delay is  
18  
19  
20 377 high in poor rural areas of China. More attention needs to be paid to early childhood  
21  
22  
23 378 development (ECD). Interventions should specifically target and support families in poverty  
24  
25  
26 379 and with low education levels, as well as prioritize maternal and children nutrition and mental  
27  
28  
29 380 health, so as to improve fetal and early child development.

### 32 381 **Acknowledgments**

35 382 The authors gratefully acknowledge the local healthcare providers and patient advisers in the  
36  
37  
38 383 field work for data collection, and thank all the participants in this study.

### 41 384 **A funding statement**

44 385 UNICEF grants 'Health and Nutrition' (0315-China/YH702).

### 47 386 **Competing interests**

50 387 The authors declare that they have no competing interests.

### 54 388 **Author's contributions**

1  
2  
3  
4 389 Ying Li did the data analysis. Jingxu Zhang drafted the article. Sufang Guo, Xiaoli Wang and  
5  
6  
7 390 Robert W. Scherpbier designed the study. Jingxu Zhang, Qianwei Wei, Cuihong Zhang and  
8  
9  
10 391 Shusheng Luo collected the data. Xiaoli Wang and Chunxia Zhao critically revised the  
11  
12 392 manuscript. All authors read and approved the final manuscript.  
13  
14

15 393 **Data sharing statement**  
16

17  
18 394 The datasets analyzed during the current study are not publicly available, but are available  
19  
20  
21 395 from the corresponding author on reasonable request.  
22  
23

24 396 **Consent for publication**  
25

26  
27  
28 397 Not applicable.  
29  
30

31 398 **Ethics approval and consent to participate**  
32

33  
34 399 This study was approved by Peking University's Biomedical Ethics Committee. Consent was  
35  
36  
37 400 obtained from the participants/guardians/parents.  
38  
39  
40  
41  
42  
43  
44  
45  
46  
47  
48  
49  
50  
51  
52  
53  
54  
55  
56  
57  
58  
59  
60

**REFERENCES**

1. Gupta N, Kabra M. Approach to the diagnosis of developmental delay - the changing scenario. *Indian J Med Res* 2014;139(1):4-6.
2. Rimal HS, Pokharel A, Saha V, et al. Burden of Developmental and Behavioral Problems among Children - A Descriptive Hospital Based Study. *Journal of Nobel Medical College* 2014;3(1)
3. Organization WH. *The global burden of disease: 2004 update*: published by the Harvard School of Public Health on behalf of the World Health Organization and the World Bank , 2008.
4. Grantham-McGregor S, Cheung YB, Cueto S, et al. Developmental potential in the first 5 years for children in developing countries. *Lancet* 2007;369(9555):60-70. doi: 10.1016/s0140-6736(07)60032-4 [published Online First: 2007/01/09]
5. Walker SP, Wachs TD, Gardner JM, et al. Child development: risk factors for adverse outcomes in developing countries. *Lancet* 2007;369(9556):145-57. doi: 10.1016/s0140-6736(07)60076-2 [published Online First: 2007/01/16]
6. Wachs TD. *Necessary but not sufficient: the role of individual and multiple influences on human development*. Washington, DC:American Psychological Association Press, 2000.
7. Qian M, Wang D, Watkins WE, et al. The effects of iodine on intelligence in children: a meta-analysis of studies conducted in China. *Asia Pacific Journal of Clinical Nutrition* 2005;14(1):32.
8. Walker SP, Chang SM, Powell CA, et al. Effects of early childhood psychosocial stimulation and nutritional supplementation on cognition and education in growth-stunted Jamaican children: Prospective cohort study. *Lancet* 2005;366(9499):1804.
9. Fernando SD, Rodrigo C, Rajapakse S. The 'hidden' burden of malaria: cognitive impairment following infection. *Malaria Journal* 2010;9(1):1-11.

10. Carter JA, Neville BG, Newton CR. Neuro-cognitive impairment following acquired central nervous system infections in childhood: a systematic review. *Brain Research Reviews* 2003;43(1):57-69.
11. Tinajero, Alfredo R, Loizillon, et al. *The Review of care, education and child development indicators in early childhood* . France: United Nations Educational, Scientific and Cultural Organization , 2012.
12. Adewuya AO, Ola BO, Aloba OO, et al. Impact of postnatal depression on infants' growth in Nigeria. *Journal of affective disorders* 2008;108(1-2):191.
13. Misri S, Oberlander TF, Fairbrother N, et al. Relation between prenatal maternal mood and anxiety and neonatal health. *Canadian Journal of Psychiatry* 2004;49(10):684-9.
14. Reading R. Maternal depression increases infant risk of diarrhoeal illness: a cohort study. *Child Care Health & Development* 2007;33(2):24-8.
15. Rahman A, Iqbal Z, Bunn J, et al. Impact of maternal depression on infant nutritional status and illness: a cohort study. *Archives of General Psychiatry* 2004;61(9):946-52.
16. Huang J, Sherraden M, Purnell JQ. Impacts of Child Development Accounts on maternal depressive symptoms: evidence from a randomized statewide policy experiment. *Social Science & Medicine* 2014;112(112C):30.
17. Pearson RM, Melotti R, Heron J, et al. Disruption to the development of maternal responsiveness? The impact of prenatal depression on mother-infant interactions. *Infant Behav Dev* 2012;35(4):613-26.
18. Letourneau NL, Tramonte L, Willms JD. Maternal depression, family functioning and children's longitudinal development. *Journal of Pediatric Nursing* 2013;28(3):223.
19. Bian R, Che H, Yang H. Item Parceling Strategies in Structural Equation Modeling. *Advances in Psychological Science* 2007;15(3):567-576.

- 1  
2  
3 20. Wei Mei, Bian Xiaoyan, Squires Jane, et al. Studies of the norm and psychometrical  
4 properties of the ages and stages questionnaires, third edition , with a Chinese national  
5 sample. *Chinese Journal of Pediatrics* 2015 ;53(12):913-918.  
6  
7  
8  
9  
10 21. Bian X, Yao G, Squires J, et al. Translation and Use of Parent-Completed Developmental  
11 Screening Test in Shanghai. *Journal of Early Childhood Research* 2012;10(2):162-175.  
12  
13 22. Lee HC, Chiu HF, Wing YK, et al. The Zung Self-rating Depression Scale: screening for  
14 depression among the Hong Kong Chinese elderly. *Journal of Geriatric Psychiatry &*  
15  
16 *Neurology* 1994;7(4):216.  
17  
18 23. Mammadova F, Sultanov M, Hajiyeva A, et al. Translation and adaptation of the Zung  
19 Self- Rating Depression Scale for application in the bilingual Azerbaijani population. *Eur*  
20 *Psychiatry* 2012;27(Suppl 2):S27-S31.  
21  
22 24. Shen LL, Lao LM, Jiang SF, et al. A survey of anxiety and depression symptoms among  
23 primary-care physicians in China. *International Journal of Psychiatry in Medicine*  
24 2012;44(3):257-70.  
25  
26 25. Zung WWK. A Self-Rating Depression Scale. *Archives of General Psychiatry*  
27 1965;12(12):63.  
28  
29 26. Dewey K. *Guiding principles for complementary feeding of the breastfed child.*  
30 Washington D, 2002  
31  
32 27. Ruel MT, Menon P. Child feeding practices are associated with child nutritional status in  
33 Latin America: innovative uses of the demographic and health surveys. *Journal of Nutrition*  
34 2002;132(6):1180.  
35  
36 28. WHO. Haemoglobin concentrations for the diagnosis of anaemia and assessment of  
37 severity. Vitamin and Mineral Nutrition Information System. Geneva, World Health  
38 Organization, 2011 (WHO/NMH/NHD/MNM/11.1)  
39  
40  
41  
42  
43  
44  
45  
46  
47  
48  
49  
50  
51  
52  
53  
54  
55  
56  
57  
58  
59  
60

- 1  
2  
3 29. Wu ML: *Structural Equation Modeling—the operation and application of AMOS*.  
4  
5 Chongqing: Chongqing University Press , 2009.  
6  
7 30. Luo R, Shi Y, Zhou H, et al. Micronutrient deficiencies and developmental delays among  
8  
9 infants: evidence from a cross-sectional survey in rural China. *Bmj Open* 2015;5(10):e008400.  
10  
11 31. Organization WH. *Developmental Difficulties in Early Childhood: Prevention, Early*  
12  
13 *Identification, Assessment and Intervention in Low- And Middle-Income Countries: A Re.*  
14  
15 World Health Organization, 2012  
16  
17 32. Lejarraga H, Pascucci MC, Krupitzky S, et al. Psychomotor development in Argentinean  
18  
19 children aged 0 – 5 years. *Paediatric & Perinatal Epidemiology* 2002;16(1):47.  
20  
21 33. Lima MC, Eickmann SH, Lima AC, et al. Determinants of mental and motor  
22  
23 development at 12 months in a low income population: a cohort study in northeast Brazil.  
24  
25 *Acta Paediatrica* 2004;93(7):969-75.  
26  
27 34. Cheung YB, Yip PS, Karlberg JP. Fetal growth, early postnatal growth and motor  
28  
29 development in Pakistani infants. *International Journal of Epidemiology* 2001;30(1):66-72.  
30  
31 35. Chiang YC, Lin DC, Lee CY, et al. Effects of parenting role and parent – child  
32  
33 interaction on infant motor development in Taiwan Birth Cohort Study. *Early Human*  
34  
35 *Development* 2015;91(4):259-64.  
36  
37 36. Kagitcibasi C, Sunar D, Bekman S. Long-term effects of early intervention: Turkish low-  
38  
39 income mothers and children. *Journal of Applied Developmental Psychology* 2001;22(4):333-  
40  
41 61.  
42  
43 37. Wolf AW, De AI, Lozoff B. Maternal depression in three Latin American samples. *Social*  
44  
45 *Psychiatry & Psychiatric Epidemiology* 2002;37(4):169-76.  
46  
47 38. Organization WH. *Developmental Difficulties in Early Childhood: Prevention, Early*  
48  
49 *Identification, Assessment and Intervention in Low- And Middle-Income Countries*. World  
50  
51 Health Organization , 2009.  
52  
53  
54  
55  
56  
57  
58  
59  
60



- 1  
2  
3  
4 39. Sohrpreston SL, Scaramella LV. Implications of Timing of Maternal Depressive  
5 Symptoms for Early Cognitive and Language Development. *Clin Child Fam Psychol Rev*  
6 2006;9(1):65-83.  
7  
8  
9  
10 40. Cooper PJ, Tomlinson M, Swartz L, et al. Post-partum depression and the mother-infant  
11 relationship in a South African peri-urban settlement. *British Journal of Psychiatry the*  
12 *Journal of Mental Science* 1999;175(6):554.  
13  
14  
15  
16 41. Murray L, Cooper P. Effects of postnatal depression on infant development. *Archives of*  
17 *Disease in Childhood* 1997;77(2):99.  
18  
19  
20 42. Bigelow AE, Maclean K, Proctor J, et al. Maternal sensitivity throughout infancy:  
21 Continuity and relation to attachment security. *Infant Behavior & Development*  
22 2010;33(1):50-60.  
23  
24  
25  
26 43. Mcelwain NL, Boothlaforce C. Maternal sensitivity to infant distress and nondistress as  
27 predictors of infant-mother attachment security. *Journal of Family Psychology Jfp Journal of*  
28 *the Division of Family Psychology of the American Psychological Association*  
29 2006;20(2):247.  
30  
31  
32  
33  
34  
35 44. Hipgrave DB, Fu X, Zhou H, et al. Poor complementary feeding practices and high  
36 anaemia prevalence among infants and young children in rural central and western China.  
37 *European Journal of Clinical Nutrition* 2014;68(8):916.  
38  
39  
40  
41 45. Lawson JA. Comparative Quantification of Health Risks. Global and Regional Burden of  
42 Disease Attributable to Selected Major Risk Factors by Majid Ezzati; Alan D. Lopez;  
43 Anthony Rodgers; Christopher J.L. Murray. *Canadian Nurse* 2004;1:1(262):: 1.  
44  
45  
46  
47 46. Engle PL, Black MM, Behrman JR, et al. Strategies to avoid the loss of developmental  
48 potential in more than 200 million children in the developing world. *The Lancet* 2007; 369:  
49 229-242.  
50  
51  
52  
53  
54  
55  
56  
57  
58  
59  
60

1  
2  
3  
4 Figure 1 Structural equation model and standardized coefficient for relationships between  
5  
6 factors that theoretically influence children's suspected developmental delay  
7  
8  
9  
10  
11  
12  
13  
14  
15  
16  
17  
18  
19  
20  
21  
22  
23  
24  
25  
26  
27  
28  
29  
30  
31  
32  
33  
34  
35  
36  
37  
38  
39  
40  
41  
42  
43  
44  
45  
46  
47  
48  
49  
50  
51  
52  
53  
54  
55  
56  
57  
58  
59  
60

For peer review only

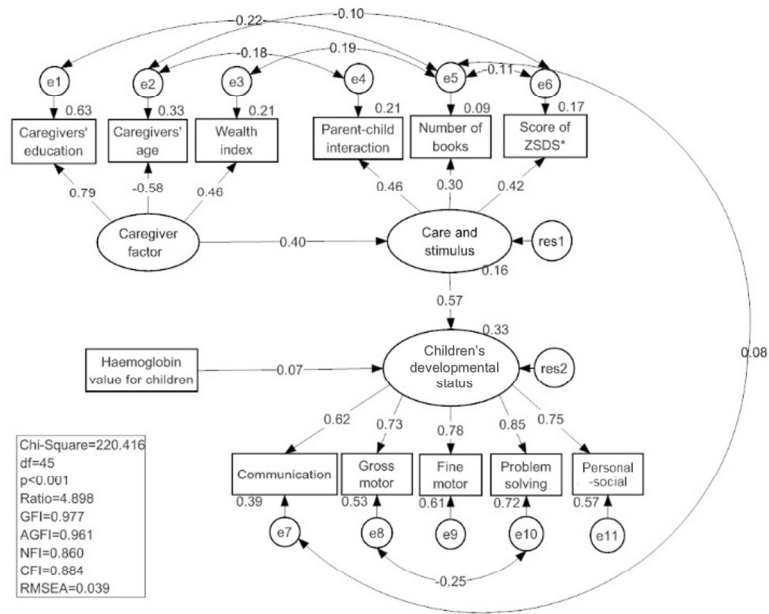

Structural equation model and standardized coefficient for relationships between factors that theoretically influence children's suspected developmental delay

## Supplementary 1

Table S1. The squared multiple correlations of variables

| Variables                | Squared multiple correlations |
|--------------------------|-------------------------------|
| Caregivers' education    | 0.631                         |
| Caregivers' age          | 0.331                         |
| Wealth index             | 0.213                         |
| Parent-child interaction | 0.208                         |
| Number of books          | 0.092                         |
| Score of ZSDS            | 0.172                         |
| Communication            | 0.387                         |
| Gross motor              | 0.527                         |
| Fine motor               | 0.605                         |
| Problem solving          | 0.719                         |
| Social emotional         | 0.566                         |

Note: ZSDS: Zung Self-rating Depression Scale

STROBE 2007 (v4) Statement—Checklist of items that should be included in reports of cross-sectional studies

| Section/Topic             | Item # | Recommendation                                                                                                                                                                       | Reported on page # |
|---------------------------|--------|--------------------------------------------------------------------------------------------------------------------------------------------------------------------------------------|--------------------|
| Title and abstract        | 1      | (a) Indicate the study’s design with a commonly used term in the title or the abstract                                                                                               | 3                  |
|                           |        | (b) Provide in the abstract an informative and balanced summary of what was done and what was found                                                                                  | 3                  |
| <b>Introduction</b>       |        |                                                                                                                                                                                      |                    |
| Background/rationale      | 2      | Explain the scientific background and rationale for the investigation being reported                                                                                                 | 5-7                |
| Objectives                | 3      | State specific objectives, including any prespecified hypotheses                                                                                                                     | 7                  |
| <b>Methods</b>            |        |                                                                                                                                                                                      |                    |
| Study design              | 4      | Present key elements of study design early in the paper                                                                                                                              | 7-8                |
| Setting                   | 5      | Describe the setting, locations, and relevant dates, including periods of recruitment, exposure, follow-up, and data collection                                                      |                    |
| Participants              | 6      | (a) Give the eligibility criteria, and the sources and methods of selection of participants                                                                                          | 7-8                |
| Variables                 | 7      | Clearly define all outcomes, exposures, predictors, potential confounders, and effect modifiers. Give diagnostic criteria, if applicable                                             | 9-11               |
| Data sources/ measurement | 8*     | For each variable of interest, give sources of data and details of methods of assessment (measurement). Describe comparability of assessment methods if there is more than one group |                    |
| Bias                      | 9      | Describe any efforts to address potential sources of bias                                                                                                                            |                    |
| Study size                | 10     | Explain how the study size was arrived at                                                                                                                                            |                    |
| Quantitative variables    | 11     | Explain how quantitative variables were handled in the analyses. If applicable, describe which groupings were chosen and why                                                         |                    |
| Statistical methods       | 12     | (a) Describe all statistical methods, including those used to control for confounding                                                                                                | 12                 |
|                           |        | (b) Describe any methods used to examine subgroups and interactions                                                                                                                  |                    |
|                           |        | (c) Explain how missing data were addressed                                                                                                                                          |                    |
|                           |        | (d) If applicable, describe analytical methods taking account of sampling strategy                                                                                                   |                    |
|                           |        | (e) Describe any sensitivity analyses                                                                                                                                                |                    |
| <b>Results</b>            |        |                                                                                                                                                                                      |                    |

|                          |     |                                                                                                                                                                                                                                                                                                                                                                                                               |       |
|--------------------------|-----|---------------------------------------------------------------------------------------------------------------------------------------------------------------------------------------------------------------------------------------------------------------------------------------------------------------------------------------------------------------------------------------------------------------|-------|
| Participants             | 13* | (a) Report numbers of individuals at each stage of study—eg numbers potentially eligible, examined for eligibility, confirmed eligible, included in the study, completing follow-up, and analysed<br>(b) Give reasons for non-participation at each stage<br>(c) Consider use of a flow diagram                                                                                                               |       |
| Descriptive data         | 14* | (a) Give characteristics of study participants (eg demographic, clinical, social) and information on exposures and potential confounders<br>(b) Indicate number of participants with missing data for each variable of interest                                                                                                                                                                               | 14    |
| Outcome data             | 15* | Report numbers of outcome events or summary measures                                                                                                                                                                                                                                                                                                                                                          |       |
| Main results             | 16  | (a) Give unadjusted estimates and, if applicable, confounder-adjusted estimates and their precision (eg, 95% confidence interval). Make clear which confounders were adjusted for and why they were included<br>(b) Report category boundaries when continuous variables were categorized<br>(c) If relevant, consider translating estimates of relative risk into absolute risk for a meaningful time period |       |
| Other analyses           | 17  | Report other analyses done—eg analyses of subgroups and interactions, and sensitivity analyses                                                                                                                                                                                                                                                                                                                |       |
| <b>Discussion</b>        |     |                                                                                                                                                                                                                                                                                                                                                                                                               |       |
| Key results              | 18  | Summarise key results with reference to study objectives                                                                                                                                                                                                                                                                                                                                                      | 21-22 |
| Limitations              | 19  | Discuss limitations of the study, taking into account sources of potential bias or imprecision. Discuss both direction and magnitude of any potential bias                                                                                                                                                                                                                                                    | 25-26 |
| Interpretation           | 20  | Give a cautious overall interpretation of results considering objectives, limitations, multiplicity of analyses, results from similar studies, and other relevant evidence                                                                                                                                                                                                                                    | 22-25 |
| Generalisability         | 21  | Discuss the generalisability (external validity) of the study results                                                                                                                                                                                                                                                                                                                                         | 26    |
| <b>Other information</b> |     |                                                                                                                                                                                                                                                                                                                                                                                                               |       |
| Funding                  | 22  | Give the source of funding and the role of the funders for the present study and, if applicable, for the original study on which the present article is based                                                                                                                                                                                                                                                 | 27    |

\*Give information separately for cases and controls in case-control studies and, if applicable, for exposed and unexposed groups in cohort and cross-sectional studies.

**Note:** An Explanation and Elaboration article discusses each checklist item and gives methodological background and published examples of transparent reporting. The STROBE checklist is best used in conjunction with this article (freely available on the Web sites of PLoS Medicine at <http://www.plosmedicine.org/>, Annals of Internal Medicine at <http://www.annals.org/>, and Epidemiology at <http://www.epidem.com/>). Information on the STROBE Initiative is available at [www.strobe-statement.org](http://www.strobe-statement.org).

# BMJ Open

## Factors influencing developmental delay among young children in poor rural China: a latent variable approach

|                                 |                                                                                                                                                                                                                                                                                                                                                                                                                                                                                                                                                                                                                                                                                                                                                                                                                                     |
|---------------------------------|-------------------------------------------------------------------------------------------------------------------------------------------------------------------------------------------------------------------------------------------------------------------------------------------------------------------------------------------------------------------------------------------------------------------------------------------------------------------------------------------------------------------------------------------------------------------------------------------------------------------------------------------------------------------------------------------------------------------------------------------------------------------------------------------------------------------------------------|
| Journal:                        | <i>BMJ Open</i>                                                                                                                                                                                                                                                                                                                                                                                                                                                                                                                                                                                                                                                                                                                                                                                                                     |
| Manuscript ID                   | bmjopen-2018-021628.R2                                                                                                                                                                                                                                                                                                                                                                                                                                                                                                                                                                                                                                                                                                                                                                                                              |
| Article Type:                   | Research                                                                                                                                                                                                                                                                                                                                                                                                                                                                                                                                                                                                                                                                                                                                                                                                                            |
| Date Submitted by the Author:   | 21-Apr-2018                                                                                                                                                                                                                                                                                                                                                                                                                                                                                                                                                                                                                                                                                                                                                                                                                         |
| Complete List of Authors:       | Zhang, Jingxu; Peking University Health Science Centre, Department of Maternal and Child Health; Ministry of Health Key Laboratory of Reproductive Health<br>Guo, Sufang; UNICEF China<br>Li, Ying; Peking University Health Science Centre, Department of Maternal and Child Health<br>Wei, Qianwei; Peking University Health Science Centre, Department of Maternal and Child Health<br>Zhang, Cuihong; Peking University Health Science Centre, Department of Maternal and Child Health<br>Wang, Xiaoli; Peking University Health Science Centre, Department of Maternal and Child Health<br>Luo, Shusheng; Peking University Health Science Centre, Department of Maternal and Child Health<br>Zhao, Chunxia; UNICEF China<br>Scherpbier, Robert; UNICEF China, Health and Nutrition, Water, Environment and Sanitation Section |
| <b>Primary Subject Heading</b>: | Public health                                                                                                                                                                                                                                                                                                                                                                                                                                                                                                                                                                                                                                                                                                                                                                                                                       |
| Secondary Subject Heading:      | Mental health, Research methods                                                                                                                                                                                                                                                                                                                                                                                                                                                                                                                                                                                                                                                                                                                                                                                                     |
| Keywords:                       | Child protection < PAEDIATRICS, Community child health < PAEDIATRICS, Developmental neurology & neurodisability < PAEDIATRICS, PUBLIC HEALTH                                                                                                                                                                                                                                                                                                                                                                                                                                                                                                                                                                                                                                                                                        |
|                                 |                                                                                                                                                                                                                                                                                                                                                                                                                                                                                                                                                                                                                                                                                                                                                                                                                                     |

SCHOLARONE™  
Manuscripts

1  
2  
3  
4 **1 Title Page**  
5  
6  
7

8 **2 Title:** Factors influencing developmental delay among young  
9  
10  
11 children in poor rural China: a latent variable approach  
12  
13

14 **4 Authors:**  
15  
16

17 Jingxu Zhang<sup>1</sup>, Sufang Guo<sup>2</sup>, Ying Li<sup>1</sup>, Qianwei Wei<sup>1</sup>, Cuihong Zhang<sup>1</sup>, Xiaoli Wang<sup>1\*</sup>,  
18 Shusheng Luo<sup>1</sup>, Chunxia Zhao<sup>2</sup>, Robert W. Scherpbier<sup>2</sup>  
19  
20

21 Corresponding author: Xiaoli Wang  
22

23 Postal address: 38 Xueyuan Road, Haidian District, Beijing, China 100191  
24

25 Email address: [xlwang@bjmu.edu.cn](mailto:xlwang@bjmu.edu.cn) (XW)  
26  
27

28 Tel: 86-010-8280-0173  
29  
30

31 **11 Institutional addresses:**  
32  
33

34 <sup>1</sup>Peking University Health Science Center, Department of Maternal and Child Health,  
35 Ministry of Health Key Laboratory of Reproductive Health, 38 Xueyuan Road, Haidian  
36 District, Beijing, China 100191  
37  
38

39 <sup>2</sup>UNICEF China, 12 Sanlitun Road, Chaoyang District, Beijing 100600, China  
40  
41  
42

43 **Email:** Jingxu Zhang (Email: [jxzhang@bjmu.edu.cn](mailto:jxzhang@bjmu.edu.cn)) ; Sufang Guo (Email:  
44

45 [sguo@unicef.org](mailto:sguo@unicef.org)); Ying Li (Email:[loveshanye\\_penny@126.com](mailto:loveshanye_penny@126.com)); Qianwei Wei (Email:  
46

47 [wqianweiai@126.com](mailto:wqianweiai@126.com)); Cuihong Zhang (Email: [chzhang25@gmail.com](mailto:chzhang25@gmail.com)); Xiaoli Wang  
48

49 (Email: [xlwang@bjmu.edu.cn](mailto:xlwang@bjmu.edu.cn)); Shusheng Luo (Email: [luoss@163.com](mailto:luoss@163.com)); Chunxia Zhao  
50  
51

52 (Email: [czhao@unicef.org](mailto:czhao@unicef.org)); Robert W. Scherpbier (Email: [rscherpbier@unicef.org](mailto:rscherpbier@unicef.org))  
53  
54  
55



1  
2  
3 21 **Word Count:** 3999 words.  
4  
5  
6  
7  
8  
9  
10  
11  
12  
13  
14  
15  
16  
17  
18  
19  
20  
21  
22  
23  
24  
25  
26  
27  
28  
29  
30  
31  
32  
33  
34  
35  
36  
37  
38  
39  
40  
41  
42  
43  
44  
45  
46  
47  
48  
49  
50  
51  
52  
53  
54  
55  
56  
57  
58  
59  
60

For peer review only

1  
2  
3  
4 **22 Abstract**

5  
6 **23 OBJECTIVES:** The aims of the study were to determine the prevalence of suspected  
7  
8  
9 **24** developmental delay in children living in poor rural China and to investigate factors  
10  
11  
12 **25** influencing child developmental delay.

13  
14  
15 **26 DESIGN:** A community-based, cross-sectional survey was conducted.

16  
17  
18 **27 SERRING:** 83 villages in Shangxi and Guizhou Provinces, China.

19  
20  
21 **28 PARTICIPANTS:** 2,514 children aged 6-35 months and their primary caregivers.

22  
23  
24 **29 OUTCOMES MEASURES:** Child suspected developmental delay was evaluated using the  
25  
26  
27 **30** Ages & Stages Questionnaires -Chinese version. Caregivers' education and age, wealth index  
28  
29  
30 **31** Infants, child feeding index, parent-child interaction, number of books and Zung self-rating  
31  
32  
32 **32** depression scale were all primary caregivers reported. Haemoglobin value was measured  
33  
34  
35 **33** using a calibrated, automated analyzer. Birth weight was obtained from medical record.

36  
37  
38 **34 RESULTS:** Overall, 35.7% of the surveyed children aged 6-35 months demonstrated  
39  
40  
41 **35** suspected developmental delay. The prevalence of suspected developmental delay was  
42  
43  
44 **36** inversely associated with age, with the prevalence among young children aged 6-11 months  
45  
46  
47 **37** nearly doubling that of children aged 30-35 months (48.0% and 22.8%, respectively). Using a  
48  
49  
50 **38** structural equation model, it was demonstrated that caregiver's care and stimulus factors and  
51  
52  
53 **39** child's hemoglobin level were directly correlated, while caregiver's socio-demographic  
54  
55  
56 **40** factors were indirectly associated with suspected developmental delay.

1  
2  
3  
4 41 CONCLUSIONS: The prevalence of suspected developmental delay is high in poor rural  
5  
6 42 areas of China. Interventions to improve child development are needed in poor rural area of  
7  
8  
9 43 China.

10  
11  
12 44 Key words: suspected Developmental Delay; Infants and young children; Structural equation  
13  
14  
15 45 model; Rural China  
16  
17  
18 46

19  
20  
21 47 **Strengths and limitations of this study**

- 22  
23 48 • This cross-sectional study includes suspected developmental delay among children under  
24  
25  
26 49 3 years of age in poor rural areas of China.  
27  
28  
29 50 • A structural equation model is a good approach to examine the influencing factors on  
30  
31  
32 51 suspected developmental delay.  
33  
34  
35 52 • A few binary variables were not incorporated in the structural equation model because of  
36  
37  
38 53 methodological limitation.  
39

40 54  
41  
42  
43  
44  
45  
46  
47  
48  
49  
50  
51  
52  
53  
54  
55  
56  
57  
58  
59  
60

## 55 INTRODUCTION

56 Developmental delay encompasses a wide spectrum of impairments or lack of developmental  
57 features that are appropriate to the child's age. It may manifest in various aspects, including  
58 motor, mental, language, and social domains[1,2]. Worldwide, developmental delay accounts  
59 for more morbidity across the lifespan than any other chronic conditions[3]. A conservative  
60 estimate is that across the world more than 200 million children under 5 years old failed to  
61 reach their potential in cognitive and social emotional development. As a number of social  
62 factors such as poverty, malnutrition, lack of appropriate care, and child abuse and neglect,  
63 have been identified as potential contributing factors to developmental delay [4],  
64 developmental delay has been a major issue in low and middle-income countries. Moreover,  
65 national statistics on young children's cognitive or social emotional development are not  
66 available for most developing countries. This gap contributes to the invisibility of the issue of  
67 development delay. With a total of 15 million disadvantaged children (defined as stunted,  
68 living in poverty, or both), China has the third largest number of disadvantaged children  
69 globally, following India (65 million) and Nigeria (16 million)[4]. It is clear that  
70 interventions and policies designed to promote child development and prevent or ameliorate  
71 developmental delay are urgently needed as China moves forward.  
72 The pathway between poverty and poor development described by Walker et al is built on the  
73 fact that poverty is associated with inadequate food, and poor access to water, sanitation and

1  
2  
3  
4 74 hygiene [5]. Poverty is also related to poor maternal education, increasing maternal stress,  
5  
6  
7 75 depression, and inadequate stimulation at home. All these factors detrimentally affect child  
8  
9  
10 76 development, and this deprived development may lead to poor school performance and  
11  
12 77 achievement. In addition, poverty and socio-cultural contextual risk factors may increase  
13  
14  
15 78 young children's exposure to biological and psychosocial risks, and the accumulation in risks  
16  
17  
18 79 often significantly harm child development. Children in developing countries are frequently  
19  
20  
21 80 exposed to multiple and cumulative risks negatively affecting their development, especially  
22  
23  
24 81 through changes in their brain structure and function, and behavioral changes[6].  
25  
26  
27 82 Biological risk factors related to young children's developmental delay include infectious  
28  
29  
30 83 disease, chronic malnutrition, iodine deficiency, iron deficiency, anemia, malaria, low birth  
31  
32 84 weight, preterm birth, and exposure to lead or arsenic, etc.[5,7-10].  
33  
34  
35 85 Psychological risk factors associated with developmental delay are mainly related to  
36  
37  
38 86 parenting, more specifically, cognitive stimulation, caregiver sensitivity and responsiveness  
39  
40  
41 87 to the child, and caregiver affect in terms of emotional warmth or rejection of the child[5].  
42  
43  
44 88 Parents and caregivers can play an important role in providing the child with a healthy, safe  
45  
46  
47 89 and caring environment[11].  
48  
49  
50 90 The effects of these biological and psychological risk factors are sensitive to contextual  
51  
52  
53 91 factors such as poverty and maternal depression[5]. Common mental disorders, including  
54  
55  
56 92 depression and anxiety among women during pregnancy, or in the first post-partum year, are

1  
2  
3  
4 93 recognized as a public health issue globally. There are emerging evidence showing that  
5  
6 94 maternal mental disorders have adverse impacts on physical and psychological development  
7  
8  
9 95 of fetuses and infants[12-18].  
10  
11  
12 96 To sum up, various social, biological and psychological factors may contribute to child  
13  
14  
15 97 developmental delay. The existing evidence indicated that four major risk factors affect at  
16  
17  
18 98 least 20–25% of children in developing countries[5]: inadequate cognitive stimulation,  
19  
20  
21 99 stunting, iron deficiency, and iodine deficiency. There is a paucity of data on the prevalence  
22  
23  
24 100 and risk factors for developmental delay in China, especially in poor rural areas where  
25  
26  
27 101 children are at high risk for developmental delay due to the economic and social restraints. In  
28  
29  
30 102 addition, although the influencing factors on child developmental delay have been widely  
31  
32  
33 103 studied, the relationships among these factors and their direct and indirect associations with  
34  
35  
36 104 the development outcome were seldom examined in the existing literature. Comparing to  
37  
38  
39 105 mostly commonly used methods, a structural equation model could effectively control  
40  
41  
42 106 measurement error [19]. More importantly, structural equation model could tackle multiple  
43  
44  
45 107 dependent variables simultaneously and examine the relationships between dependent  
46  
47  
48 108 variables and independent variables at the same time without adjusting confounders.  
49  
50  
51 109 Especially, the structural equation model can provide a latent variable approach by using the  
52  
53  
54 110 idea that theoretical concepts such as intelligence or desirability cannot be measured directly  
55  
56  
57 111 but instead observable indicators are given. The goals of this study were to determine the

1  
2  
3  
4 112 prevalence of developmental delay in young children in rural China and to explore factors  
5  
6  
7 113 contributing to child developmental delay.

8  
9 114 **METHOD**

10  
11  
12 115 **Participants and Design**

13  
14  
15 116 A community-based cross-sectional survey on child health, nutrition and development was  
16  
17  
18 117 conducted between July and September 2013 in remote mountainous areas of Shanxi and  
19  
20  
21 118 Guizhou provinces, located in the central and south-west regions of China respectively. The  
22  
23  
24 119 survey sites were the project sites of the Integrated Early Childhood Development (IECD)  
25  
26  
27 120 Project funded by UNICEF. A total of 83 villages were selected from six counties of the two  
28  
29  
30 121 provinces based on the following criteria: 1) having at least 50 children under 3 years old; 2)  
31  
32 122 having a township health center staffed with maternal and child health professionals; 3)  
33  
34  
35 123 reachable by vehicles. All the children under 3 years and their primary caregivers (defined as  
36  
37  
38 124 person(s) who take primary responsibility for taking care of child in the family) in the chosen  
39  
40  
41 125 villages were eligible for the study. Altogether, 2,953 children out of the 4,288 children in the  
42  
43  
44 126 83 villages participated in the study and their primary caregivers completed the survey. The  
45  
46  
47 127 response rate was 68.9%. All caretakers provided their written informed consent to  
48  
49  
50 128 participate in this study. The study was reviewed and approved by Peking University  
51  
52  
53 129 Biomedical Ethics Committee.

54  
55 130 For this analysis, apparently normal children were included in the analysis, children with

1  
2  
3  
4 131 hearing disabilities (e.g., deaf children) (n=16) were excluded because the disabilities may  
5  
6 132 directly affect their performance. In addition, we excluded children aged 1-5 months (n=326)  
7  
8  
9 133 because their hemoglobin values were not tested; children with implausible hemoglobin  
10  
11  
12 134 values (n =1, Hb =225 g/L ); and respondents who were not primary caregivers (n =96).  
13  
14  
15 135 Therefore, the final sample size for this analysis was 2,514 children.  
16  
17

### 18 136 **Patient and Public Involvement**

19  
20 137 At survey day, children under 3 years old and their caregivers in the village were recruited  
21  
22  
23 138 and evaluated. The research questions were conducted face-to-face and children growth,  
24  
25  
26 139 Haemoglobin value and development were measured after interview. The status of growth,  
27  
28  
29 140 anemia and development were disseminated to the caregivers immediately.  
30  
31

### 32 141 **Study Instruments**

#### 33 34 35 142 *Outcome measure : Child developmental delay measurement*

36  
37 143 The Ages & Stages Questionnaires -Chinese version (ASQ-C), which was validated recently  
38  
39  
40 144 in Chinese, was used to assess children's development status [20].ASQ-C includes various  
41  
42  
43 145 dimensions, including communication, gross motor, fine motor , problem solving and  
44  
45  
46 146 personal-social [21]. Each of the domains contains six sub-items. The responses of 'yes',  
47  
48  
49 147 'sometimes', or 'not yet' were given scores of 10, 5, and 0 points, respectively. Development  
50  
51  
52 148 delay in a certain domain was defined as if domain score was lower than 2SD (Standard  
53  
54  
55 149 Deviation) of the cutoff point in the normative norm in that domain. Overall suspected  
56  
57  
58  
59  
60



1  
2  
3  
4 150 development delay was defined as if there was delay in any one of five domains of ASQ,  
5  
6  
7 151 including communication, gross motor, fine motor, problem solving, and personal-social  
8  
9  
10 152 domain. The latent variable of children's developmental status was measured by five  
11  
12 153 dimensions of ASQ-C in this study.

14  
15 154 *Social, biological and psychological factors*

16  
17  
18 155 Household survey questionnaire

19  
20 156 A face-to-face interview was conducted with the child caregivers using a structured  
21  
22  
23 157 questionnaire developed based on UNICEF's 5th Multiple Indicator Cluster Survey (MICS5).

24  
25  
26 158 The questionnaire contained questions on the household socioeconomic status, family  
27  
28  
29 159 structure, health and development of children under three years old and their mother in the  
30  
31  
32 160 household. Wealth index was developed based on the number of household appliances  
33  
34  
35 161 (telephone, TV, washing machine, refrigerator, and internet connection).

36  
37  
38 162 Zung self-rating depression scale (ZSDS)

39  
40 163 The Zung Self-rating Depression Scale (ZSDS), validated and widely utilized in China[22-  
41  
42  
43 164 24], was used to assess caregivers' mental health status in the same research[25,26]. The  
44  
45  
46 165 scale comprises 20 items and each question is scored on a scale of 1-4 based on the following  
47  
48  
49 166 responses: never or rarely, sometimes, most of the time, or always. A score between 50 and  
50  
51  
52 167 69 indicates depression, and a score of 70 or above indicates severe depression. In this study,  
53  
54  
55 168 caregivers with a score of 50 or more were identified as positive for depression [27].  
56

1  
2  
3  
4 169 A modified infants and child feeding index (ICFI)  
5  
6  
7 170 A modified infant and child feeding index (ICFI) was constructed on the basis of current  
8  
9  
10 171 feeding practices for infants and young children recommended by WHO[28] and proposed by  
11  
12 172 Ruel and Menon[29] and was used to gather information on current feeding practices of  
13  
14  
15 173 surveyed children. This modified ICFI was based on a dietary recall of the past 24 hours from  
16  
17  
18 174 a questionnaire and it includes practices related to breastfeeding, bottle feeding, feeding  
19  
20  
21 175 frequency and food diversity given to the children prior to the survey being conducted. To  
22  
23  
24 176 take into account the age specific feeding recommendations, the modified ICFI was compiled  
25  
26  
27 177 separately for three age groups: 6-8 months, 9-11 months and 12-35 months. A score of 2  
28  
29 178 was added if the child was breastfed; 1 point added if the child had never been bottle-fed; 2  
30  
31  
32 179 points added if the child's feeding frequency met the recommendation; and 1 point if the  
33  
34  
35 180 feeding frequency was below the recommendation but above zero. Dietary diversity of food  
36  
37  
38 181 groups refers to the number of different food groups provided to the child. Altogether 7 food  
39  
40  
41 182 groups were counted, and a score of +2 was added if 4 or more food groups were consumed,  
42  
43  
44 183 and a score of +1 was added if 1 to 3 food groups were consumed.

#### 45 184 Parent-child interaction

46  
47  
48  
49 185 The level of parent-child interaction was assessed based on the following six activities that  
50  
51  
52 186 caregivers did with their child: 1) reading books to the child, 2) telling stories to the child, 3)  
53  
54  
55 187 singing songs to or with the child, 4) taking the child outdoor, 5) playing toys with the child,

1  
2  
3  
4 188 and 6) naming, counting or drawing things to promote learning with the child. If one of the  
5  
6 189 above mentioned behaviors were reported by the caregivers, +1 score was given, with the  
7  
8  
9 190 highest possible score of +6.

11  
12 191 Haemoglobin value

13  
14  
15 192 Trained staff collected capillary blood sample from the child and measured their hemoglobin  
16  
17  
18 193 (Hb) concentration using a calibrated, automated analyzer (HemoCue 201 [HemoCue,  
19  
20 194 Angelholm, Sweden]). Anemia is defined as a hemoglobin concentration <110 g/L, based on  
21  
22  
23 195 the global definition for preschool children and adjusted for altitude[30]. Children with  
24  
25  
26 196 anemia were referred to an appropriate health facility for treatment.

27  
28  
29 197 Anthropometric measurements

30  
31  
32 198 Birth weight was obtained from medical record.

33  
34  
35 199 In this part, the latent variable, caregiver factor, was measured by caregivers' education,  
36  
37  
38 200 caregivers' age and wealth index. Care and stimulus was measured by parent-child  
39  
40  
41 201 interaction, number of books and score of ZSDS.

## 42 43 202 **Data Analysis**

44  
45  
46 203 Data analysis was performed using SPSS for Windows (version 16.0, SPSS Inc., Chicago, IL,  
47  
48  
49 204 USA). Descriptive statistics were provided as median, range and interquartile range for  
50  
51  
52 205 continuous variables and count and percentage for categorical variables. A structural  
53  
54  
55 206 equation model (Amos 20 for Windows, IBM, Armonk, NY, USA) was used to test if the

207 hypothetical explanatory model fits the observed data and to apply the asymptotically  
 208 distribution-free estimate. The hypothetical explanatory model was derived from literature  
 209 [4,5]and the univariate regression result. The assignment rules and explanation of variables in  
 210 the structural equation model are described in Table 1. The model was modified according to  
 211 statistics suggested by the modification index in Amos. An absolute value of  $\geq 1.96$  ( $p \leq 0.05$ )  
 212 for the standardized  $\beta$ -coefficient T was considered significant. Goodness of fit index (GFI),  
 213 normal fit index (NFI), comparative fit index (CFI) and root mean squared error of  
 214 approximation (RMSEA) were used to test model fit. For GFI, CFI and NFI, 1 means a  
 215 perfect fit while  $>0.9$  indicates an adequate fit. For RMSEA,  $<0.05$  indicates a good model.  
 216 Chi-square statistic to test the null hypothesis was not required as the sample size was  $>1000$ .  
 217 A latent variable approach assumes that all dimensions of ASQ share the same percentage  
 218 and variance, and there is no measurement error. Thus a latent variable of children's  
 219 development status will be generated[31].

220 Table 1. Assignment rules and explanation of variables in structural equation model

| Variables             | assignment rules or explanation                                                                |
|-----------------------|------------------------------------------------------------------------------------------------|
| caregiver's education | illiteracy,+1<br>primary school,+2<br>junior high school,+3<br>senior high school and above,+4 |
| caregiver's age       | caregiver's integer age                                                                        |

---

|                                                                |                                                                                                                                                                                                        |
|----------------------------------------------------------------|--------------------------------------------------------------------------------------------------------------------------------------------------------------------------------------------------------|
| wealth index                                                   | numbers of accessories including phone (telephone or mobile), washing machine, refrigerator, TV set, access to Internet                                                                                |
| parent-child interaction                                       | 6 behaviors including read books to child, told stories, sang songs, took child outside the home, played with child, and named, counted or drew things to promote learning would form stimulus signals |
| numbers of books                                               | numbers of books children owned presently                                                                                                                                                              |
| score of ZSDS                                                  | reversed score of caregiver's depression assessed by the Zung Self-rating Depression Scale                                                                                                             |
| modified ICFI                                                  | Breastfeeding:                                                                                                                                                                                         |
|                                                                | 6-9 mo: No=0; Yes= +2;                                                                                                                                                                                 |
|                                                                | 9-11 mo: No=0; Yes=+2;                                                                                                                                                                                 |
|                                                                | 12-35 mo: No=0; Yes=+1.                                                                                                                                                                                |
|                                                                | Bottle feeding: Yes=0; No=+1;                                                                                                                                                                          |
|                                                                | Feeding frequency:                                                                                                                                                                                     |
|                                                                | 6-9 mo: 0 meal = 0; 1 meal = +1; 2 meals or more = +2;                                                                                                                                                 |
| 9-11 mo: 0 meal = 0; 1-2 meals = +1; 3 meals or more = +2;     |                                                                                                                                                                                                        |
| 12-35 mo: 0-1 meals = 0; 2-3 meals = +1; 4 meals or more = +2; |                                                                                                                                                                                                        |
|                                                                | Dietary diversity: 0 group = 0; 1-3 groups = +1; 4 or more groups = +2                                                                                                                                 |
| birth weight                                                   | birth weight of child (medical records or parental report)                                                                                                                                             |
| haemoglobin value for children                                 | haemoglobin value we tested                                                                                                                                                                            |
| Communication                                                  | score of communication assessed by ASQ                                                                                                                                                                 |
| gross motor                                                    | score of gross motor assessed by ASQ                                                                                                                                                                   |
| fine motor                                                     | score of fine motor assessed by ASQ                                                                                                                                                                    |
| problem solving                                                | score of problem solving assessed by ASQ                                                                                                                                                               |

---

---

Personal-social score of personal-social assessed by ASQ

---

221 Note: ZSDS: Zung Self-rating Depression Scale; ICFI: infant and young child feeding index

222

## 223 RESULTS

### 224 Demographic, Socio-economic Characteristics of Participants

225 About 21.0% of children surveyed were 6-11 months, while 41.1% were 12-23 months, and  
 226 37.9% were 24-35 months. Slightly more boys were included in the survey than girls (56.8%  
 227 versus 43.2%, respectively) (Table 2). About half (47.9%) were the firstborn children and  
 228 11.4% were left-behind children (i.e. their parents are migrant workers who leave rural areas  
 229 for the cities while leaving children behind in their hometowns). More than one-third (35.5%)  
 230 were ethnic minority children. Most of the caregivers interviewed (79.6%) were mothers. The  
 231 average age of caregivers was 30.19 years with a standard deviation (SD) of 9.71 years; a  
 232 majority (62.1%) of caregivers interviewed aged 20-29 years. Most (63.5%) had completed  
 233 at least 9 years of education (i.e. secondary education). Among the surveyed households,  
 234 51% lived under the national poverty line of US\$1 per day and 45% lived more than 5  
 235 kilometers to the nearest health facilities.

236 Table 2. Sociodemographic and clinical characteristics of sampled child-caregiver pairs (N=2514)

|           | N | % | N                      | % |
|-----------|---|---|------------------------|---|
| Child age |   |   | Caregivers interviewed |   |

|                      |      |      |                             |      |      |
|----------------------|------|------|-----------------------------|------|------|
| 6-11                 | 528  | 21.0 | Mother                      | 2002 | 79.6 |
| 12-23                | 1034 | 41.1 | Father                      | 189  | 7.5  |
| 24-35                | 952  | 37.9 | Grandparents                | 320  | 12.7 |
| Child gender         |      |      | Others                      | 3    | 0.1  |
| Male                 | 1427 | 56.8 | Caregivers' age             |      |      |
| Female               | 1087 | 43.2 | <20                         | 42   | 1.7  |
| Having elder sibling |      |      | 20-                         | 1561 | 62.1 |
| Yes                  | 1277 | 50.8 | 30-                         | 539  | 21.4 |
| No                   | 1203 | 47.9 | 40-                         | 349  | 13.9 |
| Unknown              | 34   | 1.4  | Unknown                     | 23   | 0.9  |
| Left-behind children |      |      | Caregivers' education       |      |      |
| Yes                  | 286  | 11.4 | Illiteracy                  | 256  | 10.2 |
| No                   | 2228 | 88.6 | Primary education           | 661  | 26.3 |
| Ethnicity            |      |      | Secondary                   | 1277 | 50.8 |
| Han                  | 1621 | 64.5 | Above secondary             | 320  | 12.7 |
| Minority             | 893  | 35.5 | Distance to health facility |      |      |
|                      |      |      | <5km                        | 1345 | 53.5 |
|                      |      |      | ≥5km                        | 1131 | 45.0 |

|  |         |    |     |
|--|---------|----|-----|
|  | Unknown | 38 | 1.5 |
|--|---------|----|-----|

237

238 **Suspected Developmental Delay among Children under 3 Years Old**

239 Overall, 35.7% of the surveyed children under 3 years of age had suspected developmental

240 delay (Table 3). Across all age groups, prevalence of suspected developmental delay was

241 inversely associated to the child's age, with the highest rate (48.0%) among children aged 6-

242 11 months and lowest (22.8%) among children aged 30-35 months. Across all domains, delay

243 in communication was the lowest (8.9%) and delay in fine motor was the highest (20.6%),

244 while other domains ranged from 15.1% to 16.7%.

245 Table 3. Prevalence of child suspected development delay

|                                  | 6-months  | 12-months | 18-months | 24-months | 30-months | Total     |
|----------------------------------|-----------|-----------|-----------|-----------|-----------|-----------|
|                                  | n(%)      | n(%)      | n(%)      | n(%)      | n(%)      | n(%)      |
|                                  | N=538     | N=473     | N=561     | N=517     | N=435     | N=2514    |
| suspected<br>Developmental delay | 258(48.0) | 210(44.4) | 207(36.9) | 123(23.8) | 99(22.8)  | 897(35.7) |
| Delay in subscales:              |           |           |           |           |           |           |
| Communication                    | 92(17.4)  | 46(9.7)   | 46(8.2)   | 22(4.3)   | 18(4.1)   | 224(8.9)  |
| Gross motor                      | 107(20.3) | 85(18.0)  | 83(14.8)  | 61(11.8)  | 44(10.1)  | 380(15.1) |
| Fine motor                       | 157(29.7) | 145(30.7) | 144(25.7) | 50(9.7)   | 23(5.3)   | 519(20.6) |
| Problem solving                  | 98(18.6)  | 131(27.7) | 84(15.0)  | 50(9.7)   | 56(12.9)  | 419(16.7) |



1  
2  
3 Personal-Social 102(19.3) 92(19.5) 96(17.1) 63(12.2) 52(12.0) 405(16.1)  
4  
5

---

6 246

7 247 **Social, biological and psychological factors**  
8  
9

10 248 The wealth index in the surveyed families ranged from 0 to 5, with a median of 4, indicating  
11  
12 249 that most of the families owned major appliances. The parent-child interaction scores ranged  
13  
14 250 from 0 to 6, with a median score of 6. On average, the surveyed children owned only 1 book  
15  
16 251 (median=1, IQR=3). Caregivers' ZSDS in this sample ranged from 38 to 80, with a median  
17  
18 252 score of 63.76. Nearly two-fifths of caregivers (38.5%) had symptoms of depression. The  
19  
20 253 ICFI ranged from 0 to 7, with a median score of 2. The hemoglobin values for the surveyed  
21  
22 254 children were 51 to 178 g/L, with a median of 110 g/L. Anemia prevalence was high at  
23  
24 255 43.8%. Birth weight of the surveyed children ranged from 1.40 to 6.00 kilograms, with a  
25  
26 256 median of 3.30 kilograms; 2.9% had low birth weight (i.e. birth weight less than 2.5 kg) .  
27  
28  
29

30 257

31 258 **Structural Equation Model for Children's Developmental Delay**  
32  
33  
34

35 259 About half of the squared multiple correlation of variables were more than 0.50 (Table S1),  
36  
37 260 which indicated that the variables had a good reliability. In the final structural equation  
38  
39 261 model (shown in Table 4), modified ICFI and birth weight were excluded from the model,  
40  
41 262 because of lack of statistically significant relationships with other variables. Figure 1 shows  
42  
43 263 the estimated covariance and paths for this model. Three factors influencing children's  
44  
45 264 developmental status were identified: 1) caregiver socio-demographic factors such as  
46  
47  
48  
49  
50  
51  
52  
53  
54  
55  
56

1  
2  
3  
4 265 caregiver's education, age, and wealth index (total effect =0.23 on child developmental  
5  
6 266 status); 2) care and stimulus factors measured by parent-child interaction, number of books  
7  
8  
9 267 and ZSDS score (direct effect= 0.57); and 3) child's hemoglobin level (direct effect= 0.07).  
10  
11  
12 268 Younger caregivers were more likely to interact with children than older caregivers  
13  
14  
15 269 (covariance of residuals =-0.18) and the latent variable- caregiver factors-had a direct positive  
16  
17  
18 270 effect on 'care and stimulus factors' (path coefficient=0.40) and an indirect positive effect on  
19  
20  
21 271 children's developmental status. The overall model fit was good as reflected by the goodness  
22  
23  
24 272 of fit index of 0.977 and the comparative fit index of 0.884.  
25  
26  
27  
28  
29  
30  
31  
32  
33  
34  
35  
36  
37  
38  
39  
40  
41  
42  
43  
44  
45  
46  
47  
48  
49  
50  
51  
52  
53  
54  
55  
56  
57  
58  
59  
60

273 Table 4. Regression weights of structural equation model

| Equation                                                         | Estimates<br>(unstandardized) | Estimates<br>(Standardized) | Standard Error | Critical ratio | P value |
|------------------------------------------------------------------|-------------------------------|-----------------------------|----------------|----------------|---------|
| Regression weights                                               |                               |                             |                |                |         |
| Care and stimulus ← caregiver factor                             | 0.402                         | 0.401                       | 0.047          | 8.497          | <0.001  |
| Children's developmental status ← care and stimulus              | 9.608                         | 0.573                       | 0.913          | 10.525         | <0.001  |
| Children's developmental status ← haemoglobin value for children | 0.593                         | 0.071                       | 0.178          | 3.331          | 0.001   |
| Caregivers' education ← caregiver factor                         | 1.000                         | 0.794                       |                |                |         |
| Caregivers' age ← caregiver factor                               | -8.358                        | -0.576                      | 0.543          | -15.380        | <0.001  |
| Wealth index ← caregiver factor                                  | 0.775                         | 0.461                       | 0.055          | 14.163         | <0.001  |
| parent-child interaction ← care and stimulus                     | 1.000                         | 0.456                       |                |                |         |
| Numbers of books ← care and stimulus                             | 1.687                         | 0.303                       | 0.220          | 7.678          | <0.001  |
| Score of ZSDS ← care and stimulus                                | 4.856                         | 0.415                       | 0.488          | 9.944          | <0.001  |
| Communication ← Children's developmental status                  | 0.863                         | 0.622                       | 0.029          | 30.054         | <0.001  |
| Gross motor ← Children's developmental status                    | 0.970                         | 0.726                       | 0.030          | 32.608         | <0.001  |
| Fine motor ← Children's developmental status                     | 1.132                         | 0.778                       | 0.028          | 40.216         | <0.001  |

|    |                                                   |         |        |       |        |        |
|----|---------------------------------------------------|---------|--------|-------|--------|--------|
| 1  |                                                   |         |        |       |        |        |
| 2  |                                                   |         |        |       |        |        |
| 3  |                                                   |         |        |       |        |        |
| 4  |                                                   |         |        |       |        |        |
| 5  | Problem solving ← Children’s developmental status | 1.188   | 0.848  | 0.030 | 40.212 | <0.001 |
| 6  |                                                   |         |        |       |        |        |
| 7  | Personal-social ← Children’s developmental status | 1.000   | 0.752  |       |        |        |
| 8  |                                                   |         |        |       |        |        |
| 9  | Covariance                                        |         |        |       |        |        |
| 10 |                                                   |         |        |       |        |        |
| 11 | e8 ↔ e10                                          | -19.912 | -0.248 | 2.961 | -6.725 | <0.001 |
| 12 |                                                   |         |        |       |        |        |
| 13 | e3 ↔ e5                                           | 0.620   | 0.188  | 0.064 | 9.708  | <0.001 |
| 14 |                                                   |         |        |       |        |        |
| 15 | e2 ↔ e4                                           | -1.695  | -0.175 | 0.270 | -6.290 | <0.001 |
| 16 |                                                   |         |        |       |        |        |
| 17 | e1 ↔ e5                                           | 0.364   | 0.215  | 0.051 | 7.136  | <0.001 |
| 18 |                                                   |         |        |       |        |        |
| 19 | e5 ↔ e7                                           | 3.079   | 0.076  | 0.680 | 4.527  | <0.001 |
| 20 |                                                   |         |        |       |        |        |
| 21 | e5 ↔ e6                                           | -2.709  | -0.115 | 0.575 | -4.712 | <0.001 |
| 22 |                                                   |         |        |       |        |        |
| 23 | e2 ↔ e6                                           | -5.270  | -0.100 | 1.247 | -4.228 | <0.001 |
| 24 |                                                   |         |        |       |        |        |

274

Note: ZSDS: Zung Self-rating Depression Scale

For peer review only

1  
2  
3  
4 275 **DISCUSSION**

5  
6 276 Our results showed that the prevalence of suspected developmental delay among children  
7  
8  
9 277 aged 6-35 months was high and inversely associated with children's age in poor rural China.  
10  
11  
12 278 Furthermore, by using the structural equation model, some risk factors for children's  
13  
14  
15 279 suspected development delay and their relationship were identified. So far only one study  
16  
17  
18 280 examined developmental delay in rural China and reported a prevalence of 20.0% in  
19  
20  
21 281 cognitive development and 32.3% in psychomotor development among children aged 6-12  
22  
23  
24 282 months[32]. Our study revealed that 35.7% of rural children under 3 years of age had  
25  
26  
27 283 suspected developmental delay and that among children aged 6-12 months, 17-20% of them  
28  
29  
30 284 had delay in communication, problem solving, personal-social and gross motor, and nearly  
31  
32  
33 285 30% had delay in fine motor development. Overall the prevalence observed in our study was  
34  
35  
36 286 comparable to the results from the previous study. According to the very limited data from  
37  
38  
39 287 the WHO report[33], the reported prevalence of developmental delay in young children was  
40  
41  
42 288 17% in Senegal, 15% in Nigeria, 13% in India, and 24% in Brazil. The lower prevalence  
43  
44  
45 289 reported by other developing countries may reflect the underestimated rates and inaccurate  
46  
47  
48 290 measurement of developmental delay. Promoting early childhood development (ECD) is a  
49  
50  
51 291 critical issue. It is recommended that government and healthcare providers should pay more  
52  
53  
54 292 attention to early diagnosis and intervention of developmental delay. Among the five  
55  
56  
57  
58  
59  
60

1  
2  
3  
4 293 domains of ASQ, suspected developmental delay of fine motor had the highest prevalence.  
5

6  
7 294 This is a key finding that requires further intervention in poor rural areas of China.  
8

9  
10 295 It was found in the structural equation model that caregiver factor, care and stimulus factor

11  
12 296 and hemoglobin values of children were directly or indirectly associated with suspected

13  
14  
15 297 developmental delay. These findings indicate potential areas that future intervention

16  
17  
18 298 programs should focus on, including improving child's feeding and nutrition, raising public

19  
20  
21 299 awareness of the issue of developmental delay, and improving parenting skills to increase

22  
23  
24 300 interaction with children.  
25

26  
27 301

### 28 302 **Relations between caregiver factors and child development**

29  
30  
31 303 Our results showed that younger caregivers with higher education level and wealth index had

32  
33  
34 304 an indirect, positive effect on their child's development. Previous studies have investigated

35  
36  
37 305 the relations between caregivers' socio-demographic factors and child development. In a

38  
39  
40 306 population-based study in Argentina and a cohort study in Brazil, it was found that poverty

41  
42  
43 307 and maternal education were positively associated with early attainment of selected

44  
45  
46 308 developmental milestones or cognitive and motor development [34,35]. Another report also

47  
48  
49 309 indicated that parenting cognitive stimulation, caregiver's responsiveness, and caregiver's

50  
51  
52 310 affect are sensitive to contextual factors such as poverty, cultural values and practices[5]. The

53  
54  
55 311 findings from our study are consistent with these previous results. In addition, our study

56  
57  
58 312 revealed that caregiver factor were indirect predictors of their child's development delay.  
59

1  
2  
3  
4 313 Although caregiver factor had no direct effect on their child's developmental status, these  
5  
6 314 factors such as caregivers' education, age and poverty level may impact other factors  
7  
8  
9 315 therefore indirectly affecting developmental delay. More attention should be paid to change  
10  
11  
12 316 these contextual factors when designing future interventions to improve children's  
13  
14  
15 317 development and health.

16  
17 318

### 19 319 **Relations between care and stimulus factors and child development**

20  
21  
22 320 The current study revealed that the most important predictor on child's suspected  
23  
24  
25 321 developmental delay was care and stimulus factors (path coefficient=0.57). Better parent-  
26  
27  
28 322 child interaction, more books and less maternal depression had positive effect on child  
29  
30  
31 323 development. Children who had one score point increase on care and stimulus factors had  
32  
33  
34 324 0.57 score increase on child development. The findings of the current study were consistent  
35  
36  
37 325 with previous studies showing the protective effect of parent-child interaction, children's  
38  
39  
40 326 books and optimistic caregivers on child development[36]. Thus, it is necessary to promote  
41  
42  
43 327 parent-child interactions, through encouraging activities such as reading books to their child,  
44  
45  
46 328 telling stories to their child, singing songs to and with their child, bringing their child to play  
47  
48  
49 329 outdoors, playing toys with their child, and naming, counting or drawing things to promote  
50  
51  
52 330 learning that would form stimulus signals[5,37,38]. Depression among caregivers was also  
53  
54  
55 331 alarmingly high in our study sample, confirming findings from previously published studies  
56  
57  
58 332 [39,40]. Our results also found caregivers with depression had increased risk on adverse

1  
2  
3  
4 333 effects on child development[17, 41]. The previously published studies have shown  
5  
6 334 depression among caregivers not only impact children's physical health, but also place  
7  
8  
9 335 children at a higher risk of developmental delay[42,43]. It is well-established that maternal  
10  
11  
12 336 depression during the period that the mother–infant interaction was observed (concurrent or  
13  
14  
15 337 recent maternal depression) was associated with reduced maternal responsiveness, which was  
16  
17  
18 338 positively associated with later emotional, cognitive and physical development of the  
19  
20  
21 339 infant[44,45]. Our study revealed a latent variable, care and stimulus factors that include  
22  
23  
24 340 caregiver depression scores and parent-child interaction scores, had a comprehensive impact  
25  
26  
27 341 on child development. Accordingly, these findings suggest an urgent need for child  
28  
29 342 development interventions on children's care and stimulus factors in poor rural China.  
30

31 343

#### 32 33 344 **Relations between Hb values and child development**

34  
35  
36 345 Our study found hemoglobin values of children had a positive effect on child development.  
37  
38  
39 346 Other biological factors, such as birth weight of children and modified ICFI did not predict  
40  
41  
42 347 child development, which was not consistent with previous research[5]. A possible  
43  
44  
45 348 explanation might be that in our structural equation model, only continuous variables were  
46  
47  
48 349 involved and three variables in our study could not be converged as one latent variable, and  
49  
50  
51 350 each variable had poor correlations with the other two variables. Anemia among children was  
52  
53  
54 351 alarmingly high in our sample, confirming findings from a previous published study[46].  
55  
56 352 These findings point to a severe public health problem[47], and provide further evidence on  
57  
58  
59



1  
2  
3  
4 353 anemia's negative impact on child growth and development[4,5,48]. Our survey found that  
5  
6  
7 354 the hemoglobin value of children had a positive effect on child development. On the positive  
8  
9  
10 355 side, the Chinese government has realized this public health issue and has started providing  
11  
12 356 micronutrient supplements named "Ying Yang Bao (YYB)" to 6-35 month old children living  
13  
14  
15 357 in poor rural areas free of charge. It is expected that this nutrition intervention program will  
16  
17  
18 358 decrease child anemia effectively. Although the current study did not find that birth weight  
19  
20  
21 359 and modified ICFI are associated with child development, it is known that poor maternal  
22  
23  
24 360 nutrition, infections and child feeding practices can impact child nutrition and  
25  
26  
27 361 development[5]. Therefore, these areas still need to be monitored and improved through  
28  
29  
30 362 government interventions in poor rural China.

31  
32  
33 363

### 364 **Limitations**

365 Our study had several limitations that should be discussed and considered. First, as a cross-  
366 sectional study, the associations identified in our study do not suggest a causal relationship  
367 between these factors and child's suspected developmental delay. Although the structured  
368 equation model is a powerful statistical technique for simultaneous consideration of the  
369 multiple variables measured, further evidence from cohort studies and interventional studies  
370 is needed for infer causal relationship. Second, because of the restrictions and limitations on  
371 structural equation model methodology and the software, many binary variables were not  
372 incorporated in the structural equation model, especially the variables measuring infant and

1  
2  
3  
4 373 young child infections such as diarrhea and pneumonia. Third, this study was conducted in  
5  
6 374 two provinces located in central and south-west regions of China. These study sites cannot  
7  
8  
9 375 represent all poor rural areas of China. Caution is warranted when generalizing findings from  
10  
11  
12 376 our studies to rural areas in China.

### 13 14 15 377 **Conclusions**

16  
17  
18 378 These preliminary findings indicated that the prevalence of suspected developmental delay is  
19  
20 379 high in poor rural areas of China. More attention needs to be paid to early childhood  
21  
22  
23 380 development (ECD). Interventions should specifically target and support families in poverty  
24  
25  
26 381 and with low education levels, as well as prioritize maternal and children nutrition and mental  
27  
28  
29 382 health, so as to improve fetal and early child development.

### 30 31 32 383 **Acknowledgments**

33  
34  
35 384 The authors gratefully acknowledge the local healthcare providers in the field work for data  
36  
37  
38 385 collection, and thank all the participants in this study.

### 39 40 41 386 **A funding statement**

42  
43  
44 387 UNICEF grants 'Health and Nutrition' (0315-China/YH702).

### 45 46 47 388 **Competing interests**

48  
49  
50 389 The authors declare that they have no competing interests.

### 51 52 53 390 **Author's contributions**

1  
2  
3  
4 391 Ying Li did the data analysis. Jingxu Zhang drafted the article. Sufang Guo, Xiaoli Wang and  
5  
6  
7 392 Robert W. Scherpier designed the study. Jingxu Zhang, Qianwei Wei, Cuihong Zhang and  
8  
9  
10 393 Shusheng Luo collected the data. Xiaoli Wang and Chunxia Zhao critically revised the  
11  
12 394 manuscript. All authors read and approved the final manuscript.  
13  
14

15 395 **Data sharing statement**  
16

17  
18 396 The datasets analyzed during the current study are not publicly available, but are available  
19  
20  
21 397 from the corresponding author on reasonable request.  
22  
23

24 398 **Consent for publication**  
25

26  
27  
28 399 Not applicable.  
29  
30

31 400 **Ethics approval and consent to participate**  
32

33  
34 401 This study was approved by Peking University's Biomedical Ethics Committee. Consent was  
35  
36  
37 402 obtained from the participants/guardians/parents.  
38  
39  
40  
41  
42  
43  
44  
45  
46  
47  
48  
49  
50  
51  
52  
53  
54  
55  
56  
57  
58  
59  
60

**REFERENCES**

1. Gupta N, Kabra M. Approach to the diagnosis of developmental delay - the changing scenario. *Indian Journal Medical Research* 2014;139(1):4-6.
2. Rimal HS, Pokharel A, Saha V, et al. Burden of Developmental and Behavioral Problems among Children - A Descriptive Hospital Based Study. *Journal of Nobel Medical College* 2014;3(1):45-49.
3. Organization WH. *The global burden of disease: 2004 update*: published by the Harvard School of Public Health on behalf of the World Health Organization and the World Bank , 2008.
4. Grantham-McGregor S, Cheung YB, Cueto S, et al. Developmental potential in the first 5 years for children in developing countries. *Lancet* 2007;369(9555):60-70.
5. Walker SP, Wachs TD, Gardner JM, et al. Child development: risk factors for adverse outcomes in developing countries. *Lancet* 2007;369(9556):145-57.
6. Wachs TD. *Necessary but not sufficient: the role of individual and multiple influences on human development*. Washington, DC:American Psychological Association Press, 2000.
7. Qian M, Wang D, Watkins WE, et al. The effects of iodine on intelligence in children: a meta-analysis of studies conducted in China. *Asia Pacific Journal of Clinical Nutrition* 2005;14(1):32-42.
8. Walker SP, Chang SM, Powell CA, et al. Effects of early childhood psychosocial stimulation and nutritional supplementation on cognition and education in growth-stunted Jamaican children: Prospective cohort study. *Lancet* 2005;366(9499):1804-1807.
9. Fernando SD, Rodrigo C, Rajapakse S. The 'hidden' burden of malaria: cognitive impairment following infection. *Malaria Journal* 2010;9(1):1-11.
10. Carter JA, Neville BG, Newton CR. Neuro-cognitive impairment following acquired central nervous system infections in childhood: a systematic review. *Brain Research Reviews* 2003;43(1):57-69.

11. Tinajero, Alfredo R, Loizillon, et al. *The Review of care, education and child development indicators in early childhood* . France: United Nations Educational, Scientific and Cultural Organization , 2012.
12. Adewuya AO, Ola BO, Aloba OO, et al. Impact of postnatal depression on infants' growth in Nigeria. *Journal of affective disorders* 2008;108(1-2):191-193.
13. Misri S, Oberlander TF, Fairbrother N, et al. Relation between prenatal maternal mood and anxiety and neonatal health. *Canadian Journal of Psychiatry* 2004;49(10):684-689.
14. Reading R. Maternal depression increases infant risk of diarrhoeal illness: a cohort study. *Child Care Health & Development* 2007;33(2):24-28.
15. Rahman A, Iqbal Z, Bunn J, et al. Impact of maternal depression on infant nutritional status and illness: a cohort study. *Archives of General Psychiatry* 2004;61(9):946-52.
16. Huang J, Sherraden M, Purnell JQ. Impacts of Child Development Accounts on maternal depressive symptoms: evidence from a randomized statewide policy experiment. *Social Science & Medicine* 2014;112(112C):30-38.
17. Pearson RM, Melotti R, Heron J, et al. Disruption to the development of maternal responsiveness? The impact of prenatal depression on mother-infant interactions. *Infant Behav Dev* 2012;35(4):613-626.
18. Letourneau NL, Tramonte L, Willms JD. Maternal depression, family functioning and children's longitudinal development. *Journal of Pediatric Nursing* 2013;28(3):223-234.
19. Bian R, Che H, Yang H. Item Parceling Strategies in Structural Equation Modeling. *Advances in Psychological Science* 2007;15(3):567-576.
20. Wei Mei, Bian Xiaoyan, Squires Jane, et al. Studies of the norm and psychometrical properties of the ages and stages questionnaires, third edition , with a Chinese national sample. *Chinese Journal of Pediatrics* 2015 ;53(12):913-918.
21. Bian X, Yao G, Squires J, et al. Translation and Use of Parent-Completed Developmental Screening Test in Shanghai. *Journal of Early Childhood Research* 2012;10(2):162-175.

- 1  
2  
3 22. Lee HC, Chiu HF, Wing YK, et al. The Zung Self-rating Depression Scale: screening for  
4 depression among the Hong Kong Chinese elderly. *Journal of Geriatric Psychiatry &*  
5  
6 *Neurology* 1994;7(4):216-220.  
7  
8  
9 23. Mammadova F, Sultanov M, Hajiyeva A, et al. Translation and adaptation of the Zung  
10 Self- Rating Depression Scale for application in the bilingual Azerbaijani population. *Eur*  
11 *Psychiatry* 2012;27(Suppl 2):S27-S31.  
12  
13  
14 24. Shen LL, Lao LM, Jiang SF, et al. A survey of anxiety and depression symptoms among  
15 primary-care physicians in China. *International Journal of Psychiatry in Medicine*  
16 2012;44(3):257-70.  
17  
18  
19 25. Wei Q, Zhang C, Zhang J, et al. Caregiver's depressive symptoms and young children's  
20 socioemotional development delays: a cross-sectional study in poor rural areas of china.  
21 *Infant Mental Health Journal* 2018 Feb 27:1-9.  
22  
23  
24 26. Shi H, Zhang J, Wang X, et al. Effectiveness of integrated early childhood development  
25 intervention on nurturing care for children aged 0-35 months in rural China. *Chinese Journal*  
26 *of Pediatrics* 2018;56(2):110-115.  
27  
28  
29 27. Zung WWK. A Self-Rating Depression Scale. *Archives of General Psychiatry*  
30 1965;12(12):63.  
31  
32  
33 28. Dewey K. *Guiding principles for complementary feeding of the breastfed child.*  
34 Washington D, 2002  
35  
36  
37 29. Ruel MT, Menon P. Child feeding practices are associated with child nutritional status in  
38 Latin America: innovative uses of the demographic and health surveys. *Journal of Nutrition*  
39 2002;132(6):1180.  
40  
41  
42 30. WHO. *Haemoglobin concentrations for the diagnosis of anaemia and assessment of*  
43 *severity. Vitamin and Mineral Nutrition Information System.* Geneva, World Health  
44  
45  
46  
47  
48  
49  
50  
51  
52  
53  
54  
55  
56  
57  
58  
59  
60

1  
2  
3 Organization, 2011 (WHO/NMH/NHD/MNM/11.1)

4  
5 (http://www.who.int/vmnis/indicators/haemoglobin.pdf, accessed [11/01/2016]).

6  
7 31. Wu ML: *Structural Equation Modeling—the operation and application of AMOS*.

8  
9 Chongqing: Chongqing University Press , 2009.

10  
11 32. Luo R, Shi Y, Zhou H, et al. Micronutrient deficiencies and developmental delays among  
12 infants: evidence from a cross-sectional survey in rural China. *Bmj Open* 2015;5(10):e008400.

13  
14 33. Organization WH. *Developmental Difficulties in Early Childhood: Prevention, Early*  
15  
16  
17  
18  
19 *Identification, Assessment and Intervention in Low- And Middle-Income Countries: A Re-*

20  
21 World Health Organization, 2012

22  
23 34. Lejarraga H, Pascucci MC, Krupitzky S, et al. Psychomotor development in Argentinean  
24 children aged 0 – 5 years. *Paediatric & Perinatal Epidemiology* 2002;16(1):47-60.

25  
26 35. Lima MC, Eickmann SH, Lima AC, et al. Determinants of mental and motor  
27 development at 12 months in a low income population: a cohort study in northeast Brazil.  
28  
29  
30  
31 *Acta Paediatrica* 2004;93(7):969-75.

32  
33 36. Cheung YB, Yip PS, Karlberg JP. Fetal growth, early postnatal growth and motor  
34 development in Pakistani infants. *International Journal of Epidemiology* 2001;30(1):66-72.

35  
36 37. Chiang YC, Lin DC, Lee CY, et al. Effects of parenting role and parent – child  
37 interaction on infant motor development in Taiwan Birth Cohort Study. *Early Human*  
38  
39  
40  
41  
42 *Development* 2015;91(4):259-64.

43  
44 38. Kagitcibasi C, Sunar D, Bekman S. Long-term effects of early intervention: Turkish low-  
45 income mothers and children. *Journal of Applied Developmental Psychology* 2001;22(4):333-  
46  
47  
48 61.

49  
50 39. Wolf AW, De AI, Lozoff B. Maternal depression in three Latin American samples. *Social*  
51  
52  
53  
54  
55 *Psychiatry & Psychiatric Epidemiology* 2002;37(4):169-76.

- 1  
2  
3  
4 40. Organization WH. *Developmental Difficulties in Early Childhood: Prevention, Early*  
5 *Identification, Assessment and Intervention in Low- And Middle-Income Countries*. World  
6 Health Organization , 2009.  
7  
8  
9  
10 41. Sohrpreston SL, Scaramella LV. Implications of Timing of Maternal Depressive  
11 Symptoms for Early Cognitive and Language Development. *Clinical Child Family*  
12 *Psychology Review* 2006;9(1):65-83.  
13  
14  
15  
16 42. Cooper PJ, Tomlinson M, Swartz L, et al. Post-partum depression and the mother-infant  
17 relationship in a South African peri-urban settlement. *British Journal of Psychiatry*  
18 1999;175(6):554-558.  
19  
20  
21  
22 43. Murray L, Cooper P. Effects of postnatal depression on infant development. *Archives of*  
23 *Disease in Childhood* 1997;77(2):99.  
24  
25  
26  
27 44. Bigelow AE, Maclean K, Proctor J, et al. Maternal sensitivity throughout infancy:  
28 Continuity and relation to attachment security. *Infant Behavior & Development*  
29 2010;33(1):50-60.  
30  
31  
32  
33 45. Mcelwain NL, Boothlaforce C. Maternal sensitivity to infant distress and nondistress as  
34 predictors of infant-mother attachment security. *Journal of Family Psychology Jfp Journal of*  
35 *the Division of Family Psychology of the American Psychological Association*  
36 2006;20(2):247.  
37  
38  
39  
40  
41 46. Hipgrave DB, Fu X, Zhou H, et al. Poor complementary feeding practices and high  
42 anaemia prevalence among infants and young children in rural central and western China.  
43 *European Journal of Clinical Nutrition* 2014;68(8):916.  
44  
45  
46  
47 47. Lawson JA. Comparative Quantification of Health Risks. Global and Regional Burden of  
48 Disease Attributable to Selected Major Risk Factors by Majid Ezzati; Alan D. Lopez;  
49 Anthony Rodgers; Christopher J.L. Murray. *Canadian Nurse* 2004;1:1(262):: 1.  
50  
51  
52  
53  
54  
55  
56  
57  
58  
59  
60



1  
2  
3 48. Engle PL, Black MM, Behrman JR, et al. Strategies to avoid the loss of developmental  
4 potential in more than 200 million children in the developing world. *Lancet* 2007; 369: 229-  
5  
6  
7 242.  
8  
9  
10  
11  
12  
13  
14  
15  
16  
17  
18  
19  
20  
21  
22  
23  
24  
25  
26  
27  
28  
29  
30  
31  
32  
33  
34  
35  
36  
37  
38  
39  
40  
41  
42  
43  
44  
45  
46  
47  
48  
49  
50  
51  
52  
53  
54  
55  
56  
57  
58  
59  
60

For peer review only

1  
2  
3  
4  
5  
6  
7  
8  
9  
10  
11  
12  
13  
14  
15  
16  
17  
18  
19  
20  
21  
22  
23  
24  
25  
26  
27  
28  
29  
30  
31  
32  
33  
34  
35  
36  
37  
38  
39  
40  
41  
42  
43  
44  
45  
46  
47  
48  
49  
50  
51  
52  
53  
54  
55  
56  
57  
58  
59  
60

Figure 1 Structural equation model and standardized coefficient for relationships between factors that theoretically influence children’s suspected developmental delay

For peer review only

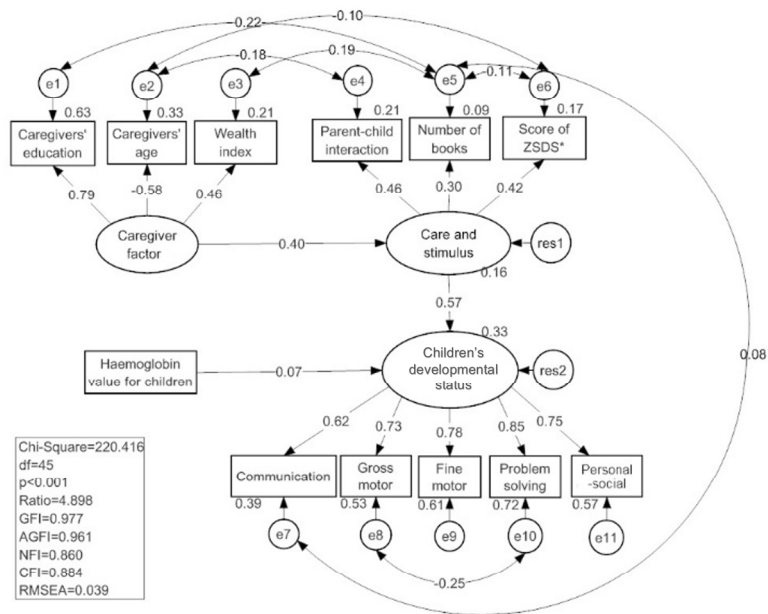

Structural equation model and standardized coefficient for relationships between factors that theoretically influence children's suspected developmental delay

## Supplementary 1

Table S1. The squared multiple correlations of variables

| Variables                | Squared multiple correlations |
|--------------------------|-------------------------------|
| Caregivers' education    | 0.631                         |
| Caregivers' age          | 0.331                         |
| Wealth index             | 0.213                         |
| Parent-child interaction | 0.208                         |
| Number of books          | 0.092                         |
| Score of ZSDS            | 0.172                         |
| Communication            | 0.387                         |
| Gross motor              | 0.527                         |
| Fine motor               | 0.605                         |
| Problem solving          | 0.719                         |
| Social emotional         | 0.566                         |

Note: ZSDS: Zung Self-rating Depression Scale

**STROBE 2007 (v4) Statement—Checklist of items that should be included in reports of *cross-sectional studies***

| Section/Topic                | Item # | Recommendation                                                                                                                                                                       | Reported on page # |
|------------------------------|--------|--------------------------------------------------------------------------------------------------------------------------------------------------------------------------------------|--------------------|
| Title and abstract           | 1      | (a) Indicate the study's design with a commonly used term in the title or the abstract                                                                                               | 3                  |
|                              |        | (b) Provide in the abstract an informative and balanced summary of what was done and what was found                                                                                  | 3                  |
| <b>Introduction</b>          |        |                                                                                                                                                                                      |                    |
| Background/rationale         | 2      | Explain the scientific background and rationale for the investigation being reported                                                                                                 | 5-7                |
| Objectives                   | 3      | State specific objectives, including any prespecified hypotheses                                                                                                                     | 7                  |
| <b>Methods</b>               |        |                                                                                                                                                                                      |                    |
| Study design                 | 4      | Present key elements of study design early in the paper                                                                                                                              | 7-8                |
| Setting                      | 5      | Describe the setting, locations, and relevant dates, including periods of recruitment, exposure, follow-up, and data collection                                                      |                    |
| Participants                 | 6      | (a) Give the eligibility criteria, and the sources and methods of selection of participants                                                                                          | 7-8                |
| Variables                    | 7      | Clearly define all outcomes, exposures, predictors, potential confounders, and effect modifiers. Give diagnostic criteria, if applicable                                             | 9-11               |
| Data sources/<br>measurement | 8*     | For each variable of interest, give sources of data and details of methods of assessment (measurement). Describe comparability of assessment methods if there is more than one group |                    |
| Bias                         | 9      | Describe any efforts to address potential sources of bias                                                                                                                            |                    |
| Study size                   | 10     | Explain how the study size was arrived at                                                                                                                                            |                    |
| Quantitative variables       | 11     | Explain how quantitative variables were handled in the analyses. If applicable, describe which groupings were chosen and why                                                         |                    |
| Statistical methods          | 12     | (a) Describe all statistical methods, including those used to control for confounding                                                                                                | 12                 |
|                              |        | (b) Describe any methods used to examine subgroups and interactions                                                                                                                  |                    |
|                              |        | (c) Explain how missing data were addressed                                                                                                                                          |                    |
|                              |        | (d) If applicable, describe analytical methods taking account of sampling strategy                                                                                                   |                    |
|                              |        | (e) Describe any sensitivity analyses                                                                                                                                                |                    |
| <b>Results</b>               |        |                                                                                                                                                                                      |                    |

|                          |     |                                                                                                                                                                                                                                                                                                                                                                                                               |       |
|--------------------------|-----|---------------------------------------------------------------------------------------------------------------------------------------------------------------------------------------------------------------------------------------------------------------------------------------------------------------------------------------------------------------------------------------------------------------|-------|
| Participants             | 13* | (a) Report numbers of individuals at each stage of study—eg numbers potentially eligible, examined for eligibility, confirmed eligible, included in the study, completing follow-up, and analysed<br>(b) Give reasons for non-participation at each stage<br>(c) Consider use of a flow diagram                                                                                                               |       |
| Descriptive data         | 14* | (a) Give characteristics of study participants (eg demographic, clinical, social) and information on exposures and potential confounders<br>(b) Indicate number of participants with missing data for each variable of interest                                                                                                                                                                               | 14    |
| Outcome data             | 15* | Report numbers of outcome events or summary measures                                                                                                                                                                                                                                                                                                                                                          |       |
| Main results             | 16  | (a) Give unadjusted estimates and, if applicable, confounder-adjusted estimates and their precision (eg, 95% confidence interval). Make clear which confounders were adjusted for and why they were included<br>(b) Report category boundaries when continuous variables were categorized<br>(c) If relevant, consider translating estimates of relative risk into absolute risk for a meaningful time period |       |
| Other analyses           | 17  | Report other analyses done—eg analyses of subgroups and interactions, and sensitivity analyses                                                                                                                                                                                                                                                                                                                |       |
| <b>Discussion</b>        |     |                                                                                                                                                                                                                                                                                                                                                                                                               |       |
| Key results              | 18  | Summarise key results with reference to study objectives                                                                                                                                                                                                                                                                                                                                                      | 21-22 |
| Limitations              | 19  | Discuss limitations of the study, taking into account sources of potential bias or imprecision. Discuss both direction and magnitude of any potential bias                                                                                                                                                                                                                                                    | 25-26 |
| Interpretation           | 20  | Give a cautious overall interpretation of results considering objectives, limitations, multiplicity of analyses, results from similar studies, and other relevant evidence                                                                                                                                                                                                                                    | 22-25 |
| Generalisability         | 21  | Discuss the generalisability (external validity) of the study results                                                                                                                                                                                                                                                                                                                                         | 26    |
| <b>Other information</b> |     |                                                                                                                                                                                                                                                                                                                                                                                                               |       |
| Funding                  | 22  | Give the source of funding and the role of the funders for the present study and, if applicable, for the original study on which the present article is based                                                                                                                                                                                                                                                 | 27    |

\*Give information separately for cases and controls in case-control studies and, if applicable, for exposed and unexposed groups in cohort and cross-sectional studies.

**Note:** An Explanation and Elaboration article discusses each checklist item and gives methodological background and published examples of transparent reporting. The STROBE checklist is best used in conjunction with this article (freely available on the Web sites of PLoS Medicine at <http://www.plosmedicine.org/>, Annals of Internal Medicine at <http://www.annals.org/>, and Epidemiology at <http://www.epidem.com/>). Information on the STROBE Initiative is available at [www.strobe-statement.org](http://www.strobe-statement.org).

# BMJ Open

## Factors influencing developmental delay among young children in poor rural China: a latent variable approach

|                                 |                                                                                                                                                                                                                                                                                                                                                                                                                                                                                                                                                                                                                                                                                                                                                                                                                                     |
|---------------------------------|-------------------------------------------------------------------------------------------------------------------------------------------------------------------------------------------------------------------------------------------------------------------------------------------------------------------------------------------------------------------------------------------------------------------------------------------------------------------------------------------------------------------------------------------------------------------------------------------------------------------------------------------------------------------------------------------------------------------------------------------------------------------------------------------------------------------------------------|
| Journal:                        | <i>BMJ Open</i>                                                                                                                                                                                                                                                                                                                                                                                                                                                                                                                                                                                                                                                                                                                                                                                                                     |
| Manuscript ID                   | bmjopen-2018-021628.R3                                                                                                                                                                                                                                                                                                                                                                                                                                                                                                                                                                                                                                                                                                                                                                                                              |
| Article Type:                   | Research                                                                                                                                                                                                                                                                                                                                                                                                                                                                                                                                                                                                                                                                                                                                                                                                                            |
| Date Submitted by the Author:   | 23-May-2018                                                                                                                                                                                                                                                                                                                                                                                                                                                                                                                                                                                                                                                                                                                                                                                                                         |
| Complete List of Authors:       | Zhang, Jingxu; Peking University Health Science Centre, Department of Maternal and Child Health; Ministry of Health Key Laboratory of Reproductive Health<br>Guo, Sufang; UNICEF China<br>Li, Ying; Peking University Health Science Centre, Department of Maternal and Child Health<br>Wei, Qianwei; Peking University Health Science Centre, Department of Maternal and Child Health<br>Zhang, Cuihong; Peking University Health Science Centre, Department of Maternal and Child Health<br>Wang, Xiaoli; Peking University Health Science Centre, Department of Maternal and Child Health<br>Luo, Shusheng; Peking University Health Science Centre, Department of Maternal and Child Health<br>Zhao, Chunxia; UNICEF China<br>Scherpbier, Robert; UNICEF China, Health and Nutrition, Water, Environment and Sanitation Section |
| <b>Primary Subject Heading</b>: | Public health                                                                                                                                                                                                                                                                                                                                                                                                                                                                                                                                                                                                                                                                                                                                                                                                                       |
| Secondary Subject Heading:      | Mental health, Research methods                                                                                                                                                                                                                                                                                                                                                                                                                                                                                                                                                                                                                                                                                                                                                                                                     |
| Keywords:                       | Child protection < PAEDIATRICS, Community child health < PAEDIATRICS, Developmental neurology & neurodisability < PAEDIATRICS, PUBLIC HEALTH                                                                                                                                                                                                                                                                                                                                                                                                                                                                                                                                                                                                                                                                                        |
|                                 |                                                                                                                                                                                                                                                                                                                                                                                                                                                                                                                                                                                                                                                                                                                                                                                                                                     |

SCHOLARONE™  
Manuscripts

1  
2  
3  
4 **1 Title Page**  
5  
6  
7

8 **2 Title:** Factors influencing developmental delay among young  
9  
10  
11 **3 children in poor rural China: a latent variable approach**  
12  
13

14 **4 Authors:**  
15  
16

17 Jingxu Zhang<sup>1</sup>, Sufang Guo<sup>2</sup>, Ying Li<sup>1</sup>, Qianwei Wei<sup>1</sup>, Cuihong Zhang<sup>1</sup>, Xiaoli Wang<sup>1\*</sup>,  
18 Shusheng Luo<sup>1</sup>, Chunxia Zhao<sup>2</sup>, Robert W. Scherpbier<sup>2</sup>  
19

20  
21 Corresponding author: Xiaoli Wang  
22

23  
24 Postal address: 38 Xueyuan Road, Haidian District, Beijing, China 100191  
25

26 Email address: [xlwang@bjmu.edu.cn](mailto:xlwang@bjmu.edu.cn) (XW)  
27

28  
29 Tel: 86-010-82801173  
30

31 Fax: 86-010-62023133  
32

33  
34 **12 Institutional addresses:**  
35

36  
37 <sup>1</sup>Peking University Health Science Center, Department of Maternal and Child Health,  
38 Ministry of Health Key Laboratory of Reproductive Health, 38 Xueyuan Road, Haidian  
39 District, Beijing, China 100191  
40

41  
42 <sup>2</sup>UNICEF China, 12 Sanlitun Road, Chaoyang District, Beijing 100600, China  
43  
44

45 **17 Email:** Jingxu Zhang (Email: [jxzhang@bjmu.edu.cn](mailto:jxzhang@bjmu.edu.cn)) ; Sufang Guo (Email:  
46

47  
48 [sguo@unicef.org](mailto:sguo@unicef.org)); Ying Li (Email: [loveshanye\\_penny@126.com](mailto:loveshanye_penny@126.com)); Qianwei Wei (Email:  
49

50  
51 [wqianweiai@126.com](mailto:wqianweiai@126.com)); Cuihong Zhang (Email: [chzhang25@gmail.com](mailto:chzhang25@gmail.com)); Xiaoli Wang  
52  
53  
54  
55  
56  
57  
58  
59  
60



1  
2  
3  
4 20 (Email: [xlwang@bjmu.edu.cn](mailto:xlwang@bjmu.edu.cn)); Shusheng Luo (Email: [luoss@163.com](mailto:luoss@163.com)); Chunxia Zhao

5  
6  
7 21 (Email: [czhao@unicef.org](mailto:czhao@unicef.org)); Robert W. Scherpbier (Email: [rscherpbier@unicef.org](mailto:rscherpbier@unicef.org))

8  
9  
10 22

11  
12  
13 23 **Word Count:** 4993 words

14  
15 24

16  
17  
18  
19  
20  
21  
22  
23  
24  
25  
26  
27  
28  
29  
30  
31  
32  
33  
34  
35  
36  
37  
38  
39  
40  
41  
42  
43  
44  
45  
46  
47  
48  
49  
50  
51  
52  
53  
54  
55  
56  
57  
58  
59  
60

For peer review only

1  
2  
3 **25 Abstract**  
4  
5

6 **26 OBJECTIVES:** The aims of the study were to determine the prevalence of suspected  
7  
8  
9 **27** developmental delay in children living in poor areas of rural China and to investigate factors  
10  
11  
12 **28** influencing child developmental delay.  
13

14 **29 DESIGN:** A community-based, cross-sectional survey was conducted.  
15  
16

17 **30 SETTING:** Eighty-three villages in Shangxi and Guizhou Provinces, China.  
18  
19

20 **31 PARTICIPANTS:** A total of 2,514 children aged 6–35 months and their primary caregivers.  
21  
22

23 **32 OUTCOME MEASURES:** Suspected child developmental delay was evaluated using the  
24  
25  
26 **33** Ages & Stages Questionnaires–Chinese version. Caregivers' education and age, wealth index,  
27  
28  
29 **34** child feeding index, parent-child interaction, number of books and Zung self-rating  
30  
31  
32 **35** depression scale were reported by the primary caregivers. Haemoglobin levels were measured  
33  
34  
35 **36** using a calibrated, automated analyser. Birth weight was obtained from medical records.  
36

37 **37 RESULTS:** Overall, 35.7% of the surveyed children aged 6–35 months demonstrated  
38  
39  
40 **38** suspected developmental delay. The prevalence of suspected developmental delay was  
41  
42  
43 **39** inversely associated with age, with the prevalence among young children aged 6–11 months  
44  
45  
46 **40** being almost double that of children aged 30–35 months (48.0% and 22.8%, respectively).  
47  
48  
49 **41** Using a structural equation model, it was demonstrated that caregiver's care and stimulus  
50  
51  
52 **42** factors and child's haemoglobin level were directly correlated, while caregiver's socio-  
53  
54  
55 **43** demographic factors were indirectly associated with suspected developmental delay.  
56  
57  
58  
59  
60

1  
2  
3  
4 44 CONCLUSIONS: The prevalence of suspected developmental delay is high in poor rural  
5  
6 45 areas of China, and appropriate interventions to improve child development are needed.  
7  
8  
9

10 46

11  
12 47 **Strengths and limitations of this study**  
13

14  
15 48 • This cross-sectional study evaluated suspected developmental delay among children  
16  
17 49 under 3 years of age in poor rural areas of China.  
18

19  
20 50 • A structural equation model is a good approach to examine the factors influencing  
21  
22 51 suspected developmental delay.  
23

24  
25  
26 52 • A few binary variables were not incorporated in the structural equation model because of  
27  
28 53 methodological limitations.  
29

30  
31 54  
32  
33  
34  
35  
36  
37  
38  
39  
40  
41  
42  
43  
44  
45  
46  
47  
48  
49  
50  
51  
52  
53  
54  
55  
56  
57  
58  
59  
60

## 55 INTRODUCTION

56 Developmental delay encompasses a wide spectrum of impairments or lack of developmental  
57 features that are appropriate to a child's age. It may manifest in various ways, including the  
58 motor, mental, language, and social domains[1,2]. Worldwide, developmental delay accounts  
59 for more morbidity across the lifespan than any other chronic condition[3]. A conservative  
60 estimate is that across the world more than 200 million children under 5 years old failed to  
61 reach their potential in cognitive and social-emotional development. As a number of social  
62 factors such as poverty, malnutrition, lack of appropriate care, and child abuse and neglect,  
63 have been identified as contributing to developmental delay[4], developmental delay has  
64 become a major issue in low- and middle-income countries. Moreover, national statistics on  
65 young children's cognitive or social emotional development are not available for most  
66 developing countries. This gap contributes to the invisibility of the issue of developmental  
67 delay. With a total of 15 million disadvantaged children (defined as stunted, living in poverty,  
68 or both), China has the third largest number of disadvantaged children globally, following  
69 India (65 million) and Nigeria (16 million)[4]. It is clear that interventions and policies  
70 designed to promote child development and prevent or ameliorate developmental delay are  
71 urgently needed as China moves forward.

72 The pathway between poverty and poor development described by Walker *et al.* is built on  
73 the fact that poverty is associated with inadequate food, and poor access to water, sanitation  
74 and hygiene [5]. Poverty is also related to poor maternal education, increasing maternal stress,

1  
2  
3  
4 75 depression, and inadequate stimulation at home. All of these factors detrimentally affect child  
5  
6  
7 76 development, and may lead to poor school performance and achievement. In addition,  
8  
9  
10 77 poverty and socio-cultural contextual risk factors may increase young children's exposure to  
11  
12 78 biological and psychosocial risks, and the accumulation of risks can significantly harm child  
13  
14  
15 79 development. Children in developing countries are frequently exposed to multiple and  
16  
17  
18 80 cumulative risks that negatively affect their development, especially by changing their brain  
19  
20  
21 81 structure and function, and behaviour[6].

22  
23 82 Biological risk factors related to young children's developmental delay include infectious  
24  
25  
26 83 disease, chronic malnutrition, iodine deficiency, iron deficiency, anaemia, malaria, low birth  
27  
28  
29 84 weight, preterm birth, and exposure to lead or arsenic[5,7-10].

30  
31  
32 85 The psychological risk factors associated with developmental delay are mainly related to  
33  
34  
35 86 parenting, more specifically, cognitive stimulation, caregiver sensitivity and responsiveness  
36  
37  
38 87 to the child, and caregiver affect in terms of emotional warmth or rejection of the child[5].

39  
40 88 Parents and caregivers can play an important role in providing the child with a healthy, safe  
41  
42  
43 89 and caring environment[11].

44  
45  
46 90 The effects of these biological and psychological risk factors are sensitive to contextual  
47  
48  
49 91 factors such as poverty and maternal depression[5]. Common mental disorders, including  
50  
51  
52 92 depression and anxiety, among women during pregnancy or in the first post-partum year are  
53  
54  
55 93 recognised as a public health issue globally. There is emerging evidence showing that

1  
2  
3  
4 94 maternal mental disorders have adverse impacts on the physical and psychological  
5  
6  
7 95 development of foetuses and infants[12-18].  
8  
9  
10 96 To sum up, various social, biological and psychological factors may contribute to child  
11  
12 97 developmental delay. The existing evidence indicates that four major risk factors affect at  
13  
14  
15 98 least 20–25% of children in developing countries[5]: inadequate cognitive stimulation,  
16  
17  
18 99 stunting, iron deficiency, and iodine deficiency. There is a paucity of data on the prevalence  
19  
20  
21 100 and risk factors for developmental delay in China, especially in poor rural areas where  
22  
23  
24 101 children are at high risk for developmental delay due to economic and social restraints. In  
25  
26  
27 102 addition, although the factors influencing child developmental delay have been widely  
28  
29  
30 103 studied, as well as in our previous publish[19], the relationships among these factors and their  
31  
32  
33 104 direct and indirect associations with the development outcome have been seldom examined.  
34  
35  
36 105 Compared to the most commonly used methods, a structural equation model can effectively  
37  
38  
39 106 control measurement error [20]. More importantly, a structural equation model can tackle  
40  
41  
42 107 multiple dependent variables simultaneously and examine the relationships between  
43  
44  
45 108 dependent variables and independent variables at the same time without adjusting for  
46  
47  
48 109 confounders. In particular, the structural equation model enables a latent variable approach by  
49  
50  
51 110 using the idea that theoretical concepts such as intelligence cannot be measured directly but,  
52  
53  
54 111 instead, observable indicators are given. The goals of this study were to determine the  
55  
56  
57 112 prevalence of developmental delay in young children in rural China and to the explore factors

1  
2  
3  
4 113 contributing to child developmental delay.  
5

6 114 **METHOD**  
7

8  
9 115 **Participants and Design**  
10

11  
12 116 A community-based cross-sectional survey on child health, nutrition and development was  
13  
14  
15 117 conducted between July and September 2013 in remote mountainous areas of Shanxi and  
16  
17  
18 118 Guizhou Provinces, which are located in the central and south-west regions of China  
19  
20  
21 119 respectively. The study locations belong to the Integrated Early Childhood Development  
22  
23  
24 120 (IECD) Project funded by UNICEF, and 83 villages from six counties in the two provinces  
25  
26  
27 121 were selected based on the following criteria: 1) more than 50 children under 3 years old; 2)  
28  
29 122 having a township health centre staffed with maternal and child health professionals; and 3)  
30  
31  
32 123 reachable by vehicles. All children in the chosen villages under 3 years old and their primary  
33  
34  
35 124 caregivers (defined as person(s) who took primary responsibility for taking care of the child  
36  
37  
38 125 in the family) comprised the study population. The survey included 2,953 of 4,288 eligible  
39  
40  
41 126 children and their primary caregivers. The response rate was 68.9%. All caretakers provided  
42  
43  
44 127 their written informed consent to participate in this study. The study was reviewed and  
45  
46  
47 128 approved by Peking University Biomedical Ethics Committee.  
48

49 129 Apparently normal children were included in the present study, while children with hearing  
50  
51  
52 130 disabilities (*e.g.* deaf children) ( $n = 16$ ) were excluded because the disabilities may directly  
53  
54  
55 131 affect their performance. In addition, we excluded children aged 1–5 months ( $n = 326$ )  
56

1  
2  
3  
4 132 because their haemoglobin values had not been tested; children with implausible  
5  
6 133 haemoglobin values (n = 1, Hb = 225 g/L); and respondents who were not primary caregivers  
7  
8  
9 134 (n = 96). Therefore, the final sample size for this analysis was 2,514 children.

## 12 135 **Patient and Public Involvement**

136 No patients were involved in setting the research question or the outcome measures, nor were  
137 they involved in developing plans for design or implementation of the study. The results of  
138 growth and anaemia were disseminated to the caregivers immediately. There are no plans to  
139 disseminate the results of the research to study participants or the relevant patient community.

## 140 140 **Study Instruments**

### 141 141 *Outcome measure: Child developmental delay measurement*

142 The Ages and Stages Questionnaires – Chinese version (ASQ-C), which was validated  
143 recently, was used to assess the development status of children[21]. This questionnaire  
144 addresses communication, gross motor, fine motor, problem solving, and personal-social  
145 skills[22]. Each domain contains six sub-items and responses of ‘yes’, ‘sometimes’, and ‘not  
146 yet’ were given scores of 10, 5, and 0 points, respectively. A score of 2 standard deviations  
147 (SD) below the cut-off point in any domain based on the normative norm indicated  
148 developmental delay. Overall suspected development delay was defined as delay in any one  
149 of the five domains of the ASQ, *i.e.* the communication, gross motor, fine motor, problem



1  
2  
3  
4 150 solving, and personal-social domains. The latent variable of children's developmental status

5  
6  
7 151 was measured using the five dimensions of the ASQ-C.

8  
9 152 *Social, biological, and psychological factors*

10  
11  
12 153 Household survey questionnaire

13  
14  
15 154 A face-to-face interview was conducted with the child caregivers using a structured

16  
17  
18 155 questionnaire developed based on UNICEF's 5th Multiple Indicator Cluster Survey (MICS5).

19  
20  
21 156 The questionnaire contained questions on the household socioeconomic status, family

22  
23  
24 157 structure, health, and development of children under 3 years old and their caregivers. Wealth

25  
26  
27 158 index was assessed according to the number of home appliances (*e.g.* telephone, television,

28  
29 159 washing machine, refrigerator, and Internet connection) in each household.

30  
31  
32 160 Zung self-rating depression scale

33  
34  
35 161 The Zung Self-rating Depression Scale (ZSDS), which has been validated and is widely used

36  
37  
38 162 in China[23-25], was employed to assess caregivers' mental health status[26,27]. This scale

39  
40  
41 163 consists of 20 items scored on a scale of 1–4 based on the following responses: never or

42  
43  
44 164 rarely, sometimes, most of the time, or always. A score between 50 and 69 indicates

45  
46  
47 165 depression, and a score of 70 or above indicates severe depression. In the present study,

48  
49 166 caregivers with scores of 50 or higher were identified as positive [28].

50  
51  
52 167 A modified infants and child feeding index (ICFI)

1  
2  
3  
4 168 A modified infant and child feeding index (ICFI) was constructed based on the current  
5  
6  
7 169 feeding practices for infants and young children recommended by the WHO [29] and those  
8  
9  
10 170 proposed by Ruel and Menon [30], and was used to gather information on the current feeding  
11  
12 171 practices of the surveyed children. This modified ICFI was based on a dietary recall of the  
13  
14  
15 172 past 24 hours from a questionnaire and it included practices related to breastfeeding, bottle  
16  
17  
18 173 feeding, feeding frequency, and food diversity of the children prior to the survey being  
19  
20  
21 174 conducted. To account for the age-specific feeding recommendations, the modified ICFI was  
22  
23  
24 175 independently performed for three different age groups: 6–8, 9–11, and 12–35 months using  
25  
26  
27 176 the following variables: breastfeeding (regardless of age, a score of +2 was given to a child  
28  
29  
30 177 who was breastfed; bottle feeding (regardless of age, a score of +1 was given to a child who  
31  
32  
33 178 was never bottle-fed; feeding frequency (a score of +2 was given if the recommended level  
34  
35  
36 179 was reached, and a score of +1 was given if the child received fewer than recommended  
37  
38  
39 180 number of meals but not zero meals); and dietary diversity of food groups (refers to the  
40  
41  
42 181 number of different food groups). Altogether, seven food groups were considered, and a score  
43  
44  
45 182 of +2 was given if four or more food groups were consumed; a score of +1 was given if 1–3  
46  
47  
48 183 food groups were consumed. Taken together, these values provided a final score for the  
49  
50  
51 184 modified ICFI.

52 185 Parent-child interaction  
53  
54  
55  
56  
57  
58  
59  
60

1  
2  
3  
4 186 Parent-child interaction was assessed based on the following six activities that caregivers  
5  
6 187 partook in with their child: 1) reading books to a child; 2) telling stories to a child; 3) singing  
7  
8  
9 188 songs to or with a child; 4) taking a child outside the home, yard, or enclosure; 5) playing  
10  
11  
12 189 with toys with a child; and 6) naming, counting or drawing things with a child to promote  
13  
14  
15 190 learning. If one of the above-mentioned behaviours were present a +1 score was given; a total  
16  
17  
18 191 score of +6 was possible.

## 192 Haemoglobin concentration

193 Trained staff members measured each child's haemoglobin concentration using a capillary  
194 blood sample with a calibrated and automated analyser (HemoCue 201 [HemoCue,  
195 Angelholm, Sweden]). Anaemia was defined as a haemoglobin concentration < 110 g/L for  
196 preschool children, based on the global definition with adjustment for altitude [31]. Children  
197 with anaemia were referred to an appropriate health facility for treatment.

## 198 Anthropometric measurements

199 Birth weight was obtained from the medical records. The latent variable, caregiver factor,  
200 was measured by assessing caregivers' education, caregivers' age, and the wealth index. Care  
201 and stimulus were measured by assessing the parent-child interaction, number of books, and  
202 ZSDS score.

## 203 **Data Analysis**

1  
2  
3  
4 204 All data analyses were performed using SPSS for Windows (version 16.0, SPSS Inc.,  
5  
6 205 Chicago, IL, USA). Descriptive statistics are shown as medians, ranges, and interquartile  
7  
8  
9 206 ranges for continuous variables and counts and percentages for categorical variables. A  
10  
11  
12 207 structural equation model (Amos 20 for Windows, IBM, Armonk, NY, USA) was used to test  
13  
14  
15 208 whether the hypothetical explanatory model fits the observed data, by applying the  
16  
17  
18 209 asymptotically distribution-free estimate. The hypothetical explanatory model was derived  
19  
20  
21 210 from the literature[4,5] and the result of a univariate regression. The assignment rules and  
22  
23  
24 211 explanation of the variables in the structural equation model are listed in Table 1. The model  
25  
26  
27 212 was modified according to statistics suggested by the modification index in Amos, and an  
28  
29 213 absolute value  $\geq 1.96$  ( $p \leq 0.05$ ) for the standardised  $\beta$ -coefficient T was considered to  
30  
31  
32 214 indicate statistical significance. The goodness-of-fit index (GFI), normal fit index (NFI),  
33  
34  
35 215 comparative fit index (CFI), and root mean square error of approximation (RMSEA) were  
36  
37  
38 216 used to test model fit. For the GFI, CFI and NFI, a value of 1 refers to a perfect fit, whereas a  
39  
40  
41 217 value  $>0.9$  indicates an adequate fit. For the RMSEA, a value  $< 0.05$  indicates a good model.  
42  
43  
44 218 A chi-square statistic for the testing of the null hypothesis was not required, because the  
45  
46  
47 219 sample size was larger than 1000. A latent variable approach assumes that all dimensions of  
48  
49  
50 220 the ASQ have the same percentage and variance, and that there is no measurement error. This  
51  
52 221 generates a latent variable of children's development status [32].  
53

54 222 Table 1. Assignment rules and explanations of variables in the structural equation model  
55  
56

| Variable                       | assignment rules or explanation                                                                                                                                                                        |
|--------------------------------|--------------------------------------------------------------------------------------------------------------------------------------------------------------------------------------------------------|
| Caregiver's education          | illiteracy,+1<br>primary school,+2<br>junior high school,+3<br>senior high school and above,+4                                                                                                         |
| Caregiver's age                | caregiver's integer age                                                                                                                                                                                |
| Wealth index                   | numbers of accessories including phone(telephone or mobile),washing machine, refrigerator, TV set, access to Internet                                                                                  |
| Parent-child interaction       | 6 behaviors including read books to child, told stories, sang songs, took child outside the home, played with child, and named, counted or drew things to promote learning would form stimulus signals |
| Numbers of books               | numbers of books children owned presently                                                                                                                                                              |
| Score of ZSDS                  | reversed score of caregiver's depression assessed by the Zung Self-rating Depression Scale                                                                                                             |
| Modified ICFI                  | Breastfeeding:                                                                                                                                                                                         |
|                                | 6-9 mo: No=0; Yes= +2;                                                                                                                                                                                 |
|                                | 9-11 mo: No=0; Yes=+2;                                                                                                                                                                                 |
|                                | 12-35 mo: No=0; Yes=+1.                                                                                                                                                                                |
| Modified ICFI                  | Bottle feeding: Yes=0; No=+1;                                                                                                                                                                          |
|                                | Feeding frequency:                                                                                                                                                                                     |
|                                | 6-9 mo: 0 meal = 0; 1 meal = +1; 2 meals or more = +2;<br>9-11 mo: 0 meal = 0; 1-2 meals = +1; 3 meals or more = +2;<br>12-35 mo: 0-1 meals = 0; 2-3 meals = +1; 4 meals or more = +2;                 |
| Birth weight                   | Dietary diversity: 0 group = 0; 1-3 groups = +1; 4 or more groups = +2<br>birth weight of child (medical records or parental report)                                                                   |
| Haemoglobin value for children | haemoglobin value we tested                                                                                                                                                                            |
| Communication                  | score of communication assessed by ASQ                                                                                                                                                                 |
| Gross motor                    | score of gross motor assessed by ASQ                                                                                                                                                                   |
| Fine motor                     | score of fine motor assessed by ASQ                                                                                                                                                                    |
| Problem solving                | score of problem solving assessed by ASQ                                                                                                                                                               |
| Personal-social                | score of personal-social assessed by ASQ                                                                                                                                                               |

223 Note: ZSDS, Zung self-rating depression scale; ICFI, infant and young child feeding index

224

## 225 RESULTS

### 226 Demographic and Socioeconomic Characteristics of Participants

227 Children aged 6–11 months (21.0%) accounted for the fewest subjects, and there were more

228 boys (56.8%) than girls in the study population (Table 2). Approximately half the subjects

229 (47.9%) were first-born children, 11.4% were left-behind children (*i.e.* their parents are

230 migrant workers who leave rural areas for the cities while leaving children behind in their

231 hometowns). More than one-third of the subjects (35.5%) were ethnic minorities. The  
 232 majority of the caregivers interviewed (79.6%) were mothers of the children; the mean ( $\pm$   
 233 standard deviation) age of the caregivers was 30.19 $\pm$  9.71 years, and most of this group  
 234 (63.5%) had completed 9 years of education (secondary) or more. Of the surveyed  
 235 households, 51% lived under the national poverty line of \$1 per day (not shown in Table 2)  
 236 and 45% lived more than 5 km from the nearest health facilities.

237 Table 2. Sociodemographic and clinical characteristics of sampled child-caregiver pairs (n = 2514)

|                      | N    | %    |                             | N    | %    |
|----------------------|------|------|-----------------------------|------|------|
| Child age            |      |      | Caregivers interviewed      |      |      |
| 6-11                 | 528  | 21.0 | Mother                      | 2002 | 79.6 |
| 12-23                | 1034 | 41.1 | Father                      | 189  | 7.5  |
| 24-35                | 952  | 37.9 | Grandparents                | 320  | 12.7 |
| Child gender         |      |      | Others                      | 3    | 0.1  |
| Male                 | 1427 | 56.8 | Caregivers' age             |      |      |
| Female               | 1087 | 43.2 | <20                         | 42   | 1.7  |
| Having elder sibling |      |      | 20-                         | 1561 | 62.1 |
| Yes                  | 1277 | 50.8 | 30-                         | 539  | 21.4 |
| No                   | 1203 | 47.9 | 40-                         | 349  | 13.9 |
| Unknown              | 34   | 1.4  | Unknown                     | 23   | 0.9  |
| Left-behind children |      |      | Caregivers' education       |      |      |
| Yes                  | 286  | 11.4 | Illiteracy                  | 256  | 10.2 |
| No                   | 2228 | 88.6 | Primary education           | 661  | 26.3 |
| Ethnicity            |      |      | Secondary                   | 1277 | 50.8 |
| Han                  | 1621 | 64.5 | Above secondary             | 320  | 12.7 |
| Minority             | 893  | 35.5 | Distance to health facility |      |      |

|         |      |      |
|---------|------|------|
| <5km    | 1345 | 53.5 |
| ≥5km    | 1131 | 45.0 |
| Unknown | 38   | 1.5  |

238

### 239 Suspected Developmental Delay among Children under 3 Years of Age

240 Overall, 35.7% of the surveyed children under 3 years of age had suspected developmental  
 241 delay (Table 3). Across all age groups, the prevalence of suspected developmental delay was  
 242 inversely associated with the child's age, with the highest rate (48.0%) among children aged  
 243 6–11 months and the lowest (22.8%) among children aged 30–35 months. Across all domains,  
 244 the prevalence of delay in communication was the lowest (8.9%) and that of delay in fine  
 245 motor was the highest (20.6%); the prevalence of the other domains ranged from 15.1% to  
 246 16.7%.

247 Table 3. Prevalence of suspected developmental delay

|                                  | 6-months  | 12-months | 18-months | 24-months | 30-months | Total     |
|----------------------------------|-----------|-----------|-----------|-----------|-----------|-----------|
|                                  | n(%)      | n(%)      | n(%)      | n(%)      | n(%)      | n(%)      |
|                                  | N=538     | N=473     | N=561     | N=517     | N=435     | N=2514    |
| suspected<br>Developmental delay | 258(48.0) | 210(44.4) | 207(36.9) | 123(23.8) | 99(22.8)  | 897(35.7) |
| Delay in subscales:              |           |           |           |           |           |           |
| Communication                    | 92(17.4)  | 46(9.7)   | 46(8.2)   | 22(4.3)   | 18(4.1)   | 224(8.9)  |
| Gross motor                      | 107(20.3) | 85(18.0)  | 83(14.8)  | 61(11.8)  | 44(10.1)  | 380(15.1) |
| Fine motor                       | 157(29.7) | 145(30.7) | 144(25.7) | 50(9.7)   | 23(5.3)   | 519(20.6) |
| Problem solving                  | 98(18.6)  | 131(27.7) | 84(15.0)  | 50(9.7)   | 56(12.9)  | 419(16.7) |
| Personal-Social                  | 102(19.3) | 92(19.5)  | 96(17.1)  | 63(12.2)  | 52(12.0)  | 405(16.1) |

248

**249 Social, biological and psychological factors**

250 The wealth index in the surveyed families ranged from 0 to 5, with a median of 4, indicating  
251 that most of the families owned major appliances. The parent-child interaction scores ranged  
252 from 0 to 6, with a median score of 6. On average, the surveyed children owned only one  
253 book (median = 1, IQR = 3). The caregivers' ZSDS score in this sample ranged from 38 to 80,  
254 with a median score of 63.76. Nearly two-fifths of the caregivers (38.5%) had symptoms of  
255 depression. The ICFI ranged from 0 to 7, with a median score of 2. The haemoglobin  
256 concentrations of the surveyed children were 51 to 178 g/L, with a median of 110 g/L. The  
257 prevalence of anaemia was high at 43.8%. The birth weight of the surveyed children ranged  
258 from 1.40 to 6.00 kg, with a median of 3.30 kg; 2.9% had low birth weight (i.e. a birth weight  
259 of less than 2.5 kg).

260

**261 Structural Equation Model for Suspected Developmental Delay in Children**

262 About half of the squared multiple correlations of variables were more than 0.50 (Table S1),  
263 which indicated that the variables had good reliability. In the final structural equation model  
264 (Table 4), modified ICFI and birth weight were excluded from the model, because no  
265 statistically significant relationships were found between these and other variables. The  
266 estimated covariance and paths for this model are shown in Figure 1. The following three  
267 variables predicted the developmental status of subjects: 1) caregiver socio-demographic



1  
2  
3  
4 268 factors such as caregiver's education, age, and wealth index (total effect on child  
5  
6 269 developmental status = 0.23); 2) care and stimulus factors measured by parent-child  
7  
8  
9 270 interaction, number of books, and ZSDS score (direct effect = 0.57); and 3) child  
10  
11  
12 271 haemoglobin concentration (direct effect = 0.07). For example, caregivers of a younger age  
13  
14  
15 272 were more likely to interact with the children (covariance of residuals = -0.18), and the latent  
16  
17  
18 273 variable of caregiver factors had a direct positive effect on the care and stimulus factors (path  
19  
20  
21 274 coefficient = 0.40) but an indirect positive effect on the developmental status of children. The  
22  
23  
24 275 overall model fit was good, as reflected by the GFI of 0.977 and the CFI of 0.884.  
25  
26  
27  
28  
29  
30  
31  
32  
33  
34  
35  
36  
37  
38  
39  
40  
41  
42  
43  
44  
45  
46  
47  
48  
49  
50  
51  
52  
53  
54  
55  
56  
57  
58  
59  
60

276 Table 4. Regression weights of the structural equation model

| Equation                                                         | Estimates<br>(unstandardised) | Estimates<br>(Standardised) | Standard Error | Critical ratio | P value |
|------------------------------------------------------------------|-------------------------------|-----------------------------|----------------|----------------|---------|
| Regression weights                                               |                               |                             |                |                |         |
| Care and stimulus ← caregiver factor                             | 0.402                         | 0.401                       | 0.047          | 8.497          | <0.001  |
| Children’s developmental status ← care and stimulus              | 9.608                         | 0.573                       | 0.913          | 10.525         | <0.001  |
| Children’s developmental status ← haemoglobin value for children | 0.593                         | 0.071                       | 0.178          | 3.331          | 0.001   |
| Caregivers’ education ← caregiver factor                         | 1.000                         | 0.794                       |                |                |         |
| Caregivers’ age ← caregiver factor                               | -8.358                        | -0.576                      | 0.543          | -15.380        | <0.001  |
| Wealth index ← caregiver factor                                  | 0.775                         | 0.461                       | 0.055          | 14.163         | <0.001  |
| Parent-child interaction ← care and stimulus                     | 1.000                         | 0.456                       |                |                |         |
| Numbers of books ← care and stimulus                             | 1.687                         | 0.303                       | 0.220          | 7.678          | <0.001  |
| Score of ZSDS ← care and stimulus                                | 4.856                         | 0.415                       | 0.488          | 9.944          | <0.001  |
| Communication ← Children’s developmental status                  | 0.863                         | 0.622                       | 0.029          | 30.054         | <0.001  |
| Gross motor ← Children’s developmental status                    | 0.970                         | 0.726                       | 0.030          | 32.608         | <0.001  |
| Fine motor ← Children’s developmental status                     | 1.132                         | 0.778                       | 0.028          | 40.216         | <0.001  |

|                                                   |         |        |       |        |        |
|---------------------------------------------------|---------|--------|-------|--------|--------|
| Problem solving ← Children's developmental status | 1.188   | 0.848  | 0.030 | 40.212 | <0.001 |
| Personal-social ← Children's developmental status | 1.000   | 0.752  |       |        |        |
| Covariance                                        |         |        |       |        |        |
| e8 ↔ e10                                          | -19.912 | -0.248 | 2.961 | -6.725 | <0.001 |
| e3 ↔ e5                                           | 0.620   | 0.188  | 0.064 | 9.708  | <0.001 |
| e2 ↔ e4                                           | -1.695  | -0.175 | 0.270 | -6.290 | <0.001 |
| e1 ↔ e5                                           | 0.364   | 0.215  | 0.051 | 7.136  | <0.001 |
| e5 ↔ e7                                           | 3.079   | 0.076  | 0.680 | 4.527  | <0.001 |
| e5 ↔ e6                                           | -2.709  | -0.115 | 0.575 | -4.712 | <0.001 |
| e2 ↔ e6                                           | -5.270  | -0.100 | 1.247 | -4.228 | <0.001 |

277

Note: ZSDS, Zung self-rating depression scale

1  
2  
3  
4 278 **DISCUSSION**

5  
6 279 The present study showed that the prevalence of suspected developmental delay among  
7  
8  
9 280 children aged 6–35 months was high and inversely related to age in the surveyed areas of  
10  
11  
12 281 poor rural China. Furthermore, a structural equation model was used to investigate the risk  
13  
14  
15 282 factors of suspected development delay in children. To date, only one study has examined  
16  
17  
18 283 developmental delay in rural China, and reported a prevalence of 20.0% in cognitive  
19  
20  
21 284 development and 32.3% in psychomotor development among children aged 6–12 months[33].  
22  
23  
24 285 Our study revealed that 35.7% of rural children under 3 years of age had suspected  
25  
26  
27 286 developmental delay and that among children aged 6–12 months, 17–20% of them had delay  
28  
29  
30 287 in the communication, problem solving, personal-social, and gross motor domains, and nearly  
31  
32  
33 288 30% had delay in fine motor development. Overall, the prevalence in our study was  
34  
35  
36 289 comparable with the results of the previous study. According to the very limited data in the  
37  
38  
39 290 WHO report[34], the prevalence of developmental delay in young children is 17% in Senegal,  
40  
41  
42 291 15% in Nigeria, 13% in India, and 24% in Brazil. The lower prevalence reported by other  
43  
44  
45 292 developing countries may reflect the underestimation, and inaccurate measurement, of  
46  
47  
48 293 developmental delay. The promotion of early childhood development (ECD) is a critical issue.  
49  
50  
51 294 It is recommended that the government and healthcare providers pay more attention to the  
52  
53  
54 295 early diagnosis and treatment of developmental delay. Among the five domains of the ASQ,

1  
2  
3  
4 296 suspected developmental delay of the fine motor domain had the highest prevalence. This is a  
5  
6  
7 297 key finding that suggests the need for further intervention in poor rural areas of China.  
8  
9 298 In the structural equation model, caregiver factors, care and stimulus factors, and child  
10  
11  
12 299 haemoglobin concentrations were directly or indirectly associated with suspected  
13  
14  
15 300 developmental delay. These findings indicate areas on which future intervention programs  
16  
17  
18 301 should focus, including improving feeding and nutrition, raising public awareness of the issue  
19  
20  
21 302 of developmental delay, and improving parenting skills to increase frequency of interaction  
22  
23  
24 303 with their children.  
25

304

### 305 **Relationships between caregiver factors and child development**

306 Younger caregivers with a higher level of education and a higher wealth index had an indirect  
31  
32  
33 307 positive effect on child development. Previous studies have primarily investigated  
34  
35  
36 308 relationships between the sociodemographic characteristics of caregivers and child  
37  
38  
39 309 development. For example, a population-based study in Argentina and a cohort study in  
40  
41  
42 310 Brazil showed that poverty and maternal education were positively associated with the early  
43  
44  
45 311 attainment of selected developmental milestones as well as cognitive and motor development  
46  
47  
48 312 [35,36]. Furthermore, parenting cognitive stimulation, caregivers' responsiveness, and  
49  
50  
51 313 caregivers' affect are related to poverty, cultural values and practices[5]. Similarly, the model  
52  
53  
54 314 in the present study revealed that there was a path between caregiver factors and child  
55  
56  
57 315 development, in which caregiver factors were indirect predictors of developmental delays.

1  
2  
3  
4 316 Although caregiver factors did not have a direct effect on childhood developmental status, the  
5  
6  
7 317 education, age and poverty level of caregivers should receive more attention in future  
8  
9 318 interventions aimed at improving child development and health.

10  
11 319

### 12 13 320 **Relationships between care and stimulus factors and child development**

14  
15  
16 321 The present study demonstrated that the most important predictors of suspected childhood  
17  
18  
19 322 developmental delay were care and stimulus factors (path coefficient = 0.57). Better parent-  
20  
21  
22 323 child interactions, more books and a lower level of maternal depression had positive effects  
23  
24  
25 324 on child development, and a one-point increase in care and stimulus factors was associated  
26  
27  
28 325 with a 0.57-point increase in child development. These findings are consistent with those of  
29  
30  
31 326 previous studies that demonstrated the protective effects of parent-child interactions,  
32  
33  
34 327 children's books and optimistic caregivers on child development[37]. Thus, it is necessary to  
35  
36  
37 328 promote parent-child interactions, such as reading books, telling stories, singing songs,  
38  
39  
40 329 taking the child outside the home, playing with the child, and naming, counting or drawing  
41  
42  
43 330 things to promote learning and the formation of stimulus signals[5,38,39]. The incidence of  
44  
45  
46 331 depression among caregivers was alarmingly high in the present sample, and is similar to  
47  
48  
49 332 previous findings[40,41]. Additionally, the present results confirm those of other studies that  
50  
51  
52 333 reported that caregivers with depression are at an increased risk of having adverse effects on  
53  
54  
55 334 child development[17, 42]. Depression among caregivers not only affects the health of the  
56  
57  
58 335 child but also places such children at a greater risk of developmental delay[43,44]. It is well-

1  
2  
3  
4 336 established that concurrent maternal depression during mother–infant interactions is  
5  
6  
7 337 associated with reduced maternal responsiveness, which, in turn, is positively associated with  
8  
9  
10 338 later alterations in the emotional, cognitive and physical development of the infant[45,46].  
11  
12 339 The present study revealed that a latent variable, care and stimulus factors (including  
13  
14  
15 340 caregiver depression scores and parent-child interactions), had a joint impact on development.  
16  
17  
18 341 Thus, there is an urgent need for child development interventions directed at phenomena  
19  
20  
21 342 related to the care and stimulation of children in poor rural China.  
22  
23  
24

#### 25 344 **Relationships between haemoglobin concentrations and child development**

26  
27  
28 345 In the present study, the haemoglobin concentrations of children had a weak positive effect  
29  
30  
31 346 on child development, whereas other biological factors, such as birth weight and modified  
32  
33  
34 347 ICFI score, did not predict child development. These findings were not consistent with those  
35  
36  
37 348 of previous research[5]. It is possible that the structural equation model used in the present  
38  
39  
40 349 study, which involved only three continuous variables that could not be treated as one latent  
41  
42  
43 350 variable due to their poor correlations, may have played a role in this discrepancy. The  
44  
45  
46 351 incidence of anaemia among children was alarmingly high in the present sample, as in a  
47  
48  
49 352 previous study[47]. This issue constitutes a severe public health problem[48], and likely has a  
50  
51  
52 353 significant impact on child growth and development[4,5,49]. Our results indicate that the  
53  
54  
55 354 haemoglobin concentration of children has a positive effect on child development.  
56  
57  
58 355 Fortunately, the Chinese Government is aware of this public health issue and has initiated a

1  
2  
3  
4 356 program to provide the micronutrient supplements named Ying Yang Bao (YYB) to 6–35-  
5  
6 357 month-old children living in poor rural areas free of charge. This intervention may decrease  
7  
8  
9 358 the prevalence of anaemia in children. Although we found that birth weight and modified  
10  
11  
12 359 ICFI did not predict child development, poor maternal nutrition, infections and child-feeding  
13  
14  
15 360 practices in poor areas of rural China should be regularly monitored and improved by the  
16  
17  
18 361 government.  
19

20 362

### 21 363 **Limitations**

22  
23  
24  
25 364 The present study has several limitations that should be considered. First, due to the cross-  
26  
27  
28 365 sectional design of this study, the associations revealed by the structural equation model  
29  
30  
31 366 could not be confirmed as causative relationships, even though these models are a powerful  
32  
33  
34 367 statistical technique for the simultaneous consideration of multiple variables, further evidence  
35  
36  
37 368 from cohort studies and interventional studies is needed to infer the causality of these  
38  
39  
40 369 relationships. Second, due to the restrictions and limitations inherent in the methodology and  
41  
42  
43 370 the software, many binary variables, including those measuring infant and young childhood  
44  
45  
46 371 infections (*e.g.* diarrhoea and pneumonia) were not incorporated into the structural equation  
47  
48  
49 372 model. Third, this study was conducted in two provinces in central and south-west China.  
50  
51  
52 373 These study sites are not representative of all poor rural areas of China. Caution is warranted  
53  
54  
55 374 when generalising our findings to other rural areas in China.

### 56 375 **Conclusions**



1  
2  
3  
4 376 These preliminary findings indicate that the prevalence of suspected developmental delay is  
5  
6  
7 377 high in poor rural areas of China. More attention needs to be paid to early childhood  
8  
9  
10 378 development. Interventions should specifically target and support families in poverty and  
11  
12 379 those with low education levels, as well as prioritise maternal and children's nutrition and  
13  
14  
15 380 mental health, so as to improve foetal and early child development.  
16

### 17 381 **Acknowledgments**

18  
19  
20  
21 382 The authors gratefully acknowledge the local healthcare providers for data collection and  
22  
23  
24 383 thank all the participants in this study.  
25

### 26 384 **Funding statement**

27  
28  
29  
30 385 UNICEF grants 'Health and Nutrition' (0315-China/YH702).  
31

### 32 386 **Competing interests**

33  
34  
35  
36 387 The authors declare that they have no competing interests.  
37

### 38 388 **Author's contributions**

39  
40  
41  
42 389 Ying Li did the data analysis. Jingxu Zhang drafted the article. Sufang Guo, Xiaoli Wang and  
43  
44  
45 390 Robert W. Scherpbier designed the study. Jingxu Zhang, Qianwei Wei, Cuihong Zhang and  
46  
47  
48 391 Shusheng Luo collected the data. Xiaoli Wang and Chunxia Zhao critically revised the  
49  
50  
51 392 manuscript. All authors read and approved the final manuscript.  
52

### 53 393 **Data sharing statement**

1  
2  
3  
4 394 The datasets analysed in the current study are not publicly available, but are available from  
5  
6 395 the corresponding author upon reasonable request.  
7  
8

9  
10 396 **Consent for publication**  
11

12  
13 397 Not applicable.  
14  
15

16 398 **Ethics approval and consent to participate**  
17

18  
19 399 This study was approved by the Peking University Biomedical Ethics Committee. Consent  
20  
21  
22 400 was obtained from the participants and their guardians or parents.  
23  
24  
25  
26  
27  
28  
29  
30  
31  
32  
33  
34  
35  
36  
37  
38  
39  
40  
41  
42  
43  
44  
45  
46  
47  
48  
49  
50  
51  
52  
53  
54  
55  
56  
57  
58  
59  
60

**REFERENCES**

1. Gupta N, Kabra M. Approach to the diagnosis of developmental delay - the changing scenario. *Indian Journal Medical Research* 2014;139(1):4-6.
2. Rimal HS, Pokharel A, Saha V, *et al.* Burden of Developmental and Behavioral Problems among Children - A Descriptive Hospital Based Study. *Journal of Nobel Medical College* 2014;3(1):45-49.
3. Organization WH. *The global burden of disease: 2004 update*: published by the Harvard School of Public Health on behalf of the World Health Organization and the World Bank , 2008.
4. Grantham-McGregor S, Cheung YB, Cueto S, *et al.* Developmental potential in the first 5 years for children in developing countries. *Lancet* 2007;369(9555):60-70.
5. Walker SP, Wachs TD, Gardner JM, *et al.* Child development: risk factors for adverse outcomes in developing countries. *Lancet* 2007;369(9556):145-57.
6. Wachs TD. *Necessary but not sufficient: the role of individual and multiple influences on human development*. Washington, DC:American Psychological Association Press, 2000.
7. Qian M, Wang D, Watkins WE, *et al.* The effects of iodine on intelligence in children: a meta-analysis of studies conducted in China. *Asia Pacific Journal of Clinical Nutrition* 2005;14(1):32-42.
8. Walker SP, Chang SM, Powell CA, *et al.* Effects of early childhood psychosocial stimulation and nutritional supplementation on cognition and education in growth-stunted Jamaican children: Prospective cohort study. *Lancet* 2005;366(9499):1804-1807.
9. Fernando SD, Rodrigo C, Rajapakse S. The 'hidden' burden of malaria: cognitive impairment following infection. *Malaria Journal* 2010;9(1):1-11.
10. Carter JA, Neville BG, Newton CR. Neuro-cognitive impairment following acquired central nervous system infections in childhood: a systematic review. *Brain Research Reviews* 2003;43(1):57-69.

11. Tinajero, Alfredo R, Loizillon, *et al.* *The Review of care, education and child development indicators in early childhood* . France: United Nations Educational, Scientific and Cultural Organization , 2012.
12. Adewuya AO, Ola BO, Aloba OO, *et al.* Impact of postnatal depression on infants' growth in Nigeria. *Journal of affective disorders* 2008;108(1-2):191-193.
13. Misri S, Oberlander TF, Fairbrother N, *et al.* Relation between prenatal maternal mood and anxiety and neonatal health. *Canadian Journal of Psychiatry* 2004;49(10):684-689.
14. Reading R. Maternal depression increases infant risk of diarrhoeal illness: a cohort study. *Child Care Health & Development* 2007;33(2):24-28.
15. Rahman A, Iqbal Z, Bunn J, *et al.* Impact of maternal depression on infant nutritional status and illness: a cohort study. *Archives of General Psychiatry* 2004;61(9):946-52.
16. Huang J, Sherraden M, Purnell JQ. Impacts of Child Development Accounts on maternal depressive symptoms: evidence from a randomized statewide policy experiment. *Social Science & Medicine* 2014;112(112C):30-38.
17. Pearson RM, Melotti R, Heron J, *et al.* Disruption to the development of maternal responsiveness? The impact of prenatal depression on mother-infant interactions. *Infant Behav Dev* 2012;35(4):613-626.
18. Letourneau NL, Tramonte L, Willms JD. Maternal depression, family functioning and children's longitudinal development. *Journal of Pediatric Nursing* 2013;28(3):223-234.
19. Wei Q, Zhang J, Scherpbier R, *et al.* High prevalence of developmental delay among children under three years of age in poverty-stricken areas of China. *Public Health* 2015;129:1610-1617.
20. Bian R, Che H, Yang H. Item Parceling Strategies in Structural Equation Modeling. *Advances in Psychological Science* 2007;15(3):567-576.

- 1  
2  
3 21. Wei Mei, Bian Xiaoyan, Squires Jane, *et al.* Studies of the norm and psychometrical  
4 properties of the ages and stages questionnaires, third edition , with a Chinese national  
5 sample. *Chinese Journal of Pediatrics* 2015;53(12):913-918.  
6  
7  
8  
9  
10 22. Bian X, Yao G, Squires J, *et al.* Translation and Use of Parent-Completed Developmental  
11 Screening Test in Shanghai. *Journal of Early Childhood Research* 2012;10(2):162-175.  
12  
13 23. Lee HC, Chiu HF, Wing YK, *et al.* The Zung Self-rating Depression Scale: screening for  
14 depression among the Hong Kong Chinese elderly. *Journal of Geriatric Psychiatry &*  
15 *Neurology* 1994;7(4):216-220.  
16  
17  
18  
19 24. Mammadova F, Sultanov M, Hajiyeva A, *et al.* Translation and adaptation of the Zung  
20 Self- Rating Depression Scale for application in the bilingual Azerbaijani population. *Eur*  
21 *Psychiatry* 2012;27(Suppl 2):S27-S31.  
22  
23  
24  
25 25. Shen LL, Lao LM, Jiang SF, *et al.* A survey of anxiety and depression symptoms among  
26 primary-care physicians in China. *International Journal of Psychiatry in Medicine*  
27 2012;44(3):257-70.  
28  
29  
30  
31  
32 26. Wei Q, Zhang C, Zhang J, *et al.* Caregiver's depressive symptoms and young children's  
33 socioemotional development delays: a cross-sectional study in poor rural areas of china.  
34 *Infant Mental Health Journal* 2018 Feb 27:1-9.  
35  
36  
37  
38 27. Shi H, Zhang J, Wang X, *et al.* Effectiveness of integrated early childhood development  
39 intervention on nurturing care for children aged 0-35 months in rural China. *Chinese Journal*  
40 *of Pediatrics* 2018;56(2):110-115.  
41  
42  
43  
44 28. Zung WWK. A Self-Rating Depression Scale. *Archives of General Psychiatry*  
45 1965;12(12):63.  
46  
47  
48  
49 29. Dewey K. *Guiding principles for complementary feeding of the breastfed child.*  
50 Washington D, 2002  
51  
52  
53  
54  
55  
56  
57  
58  
59  
60

- 1  
2  
3 30. Ruel MT, Menon P. Child feeding practices are associated with child nutritional status in  
4 Latin America: innovative uses of the demographic and health surveys. *Journal of Nutrition*  
5 2002;132(6):1180.  
6  
7  
8  
9 31. WHO. *Haemoglobin concentrations for the diagnosis of anaemia and assessment of*  
10 *severity. Vitamin and Mineral Nutrition Information System.* Geneva, World Health  
11 Organization, 2011 (WHO/NMH/NHD/MNM/11.1)  
12  
13 (http://www.who.int/vmnis/indicators/haemoglobin.pdf, accessed [11/01/2016]).  
14  
15  
16 32. Wu ML: *Structural Equation Modeling—the operation and application of AMOS.*  
17 Chongqing: Chongqing University Press , 2009.  
18  
19  
20 33. Luo R, Shi Y, Zhou H, *et al.* Micronutrient deficiencies and developmental delays among  
21 infants: evidence from a cross-sectional survey in rural China. *Bmj Open*  
22 2015;5(10):e008400.  
23  
24  
25  
26 34. Organization WH. *Developmental Difficulties in Early Childhood: Prevention, Early*  
27 *Identification, Assessment and Intervention in Low- And Middle-Income Countries: A Re.*  
28 World Health Organization, 2012  
29  
30  
31  
32  
33 35. Lejarraga H, Pascucci MC, Krupitzky S, *et al.* Psychomotor development in Argentinean  
34 children aged 0–5 years. *Paediatric & Perinatal Epidemiology* 2002;16(1):47-60.  
35  
36  
37 36. Lima MC, Eickmann SH, Lima AC, *et al.* Determinants of mental and motor  
38 development at 12 months in a low income population: a cohort study in northeast Brazil.  
39 *Acta Paediatrica* 2004;93(7):969-75.  
40  
41  
42  
43 37. Cheung YB, Yip PS, Karlberg JP. Fetal growth, early postnatal growth and motor  
44 development in Pakistani infants. *International Journal of Epidemiology* 2001;30(1):66-72.  
45  
46  
47 38. Chiang YC, Lin DC, Lee CY, *et al.* Effects of parenting role and parent–child interaction  
48 on infant motor development in Taiwan Birth Cohort Study. *Early Human Development*  
49 2015;91(4):259-64.  
50  
51  
52  
53  
54  
55  
56

- 1  
2  
3 39. Kagitcibasi C, Sunar D, Bekman S. Long-term effects of early intervention: Turkish low-  
4 income mothers and children. *Journal of Applied Developmental Psychology* 2001;22(4):333-  
5 61.  
6  
7  
8  
9 40. Wolf AW, De AI, Lozoff B. Maternal depression in three Latin American samples. *Social*  
10 *Psychiatry & Psychiatric Epidemiology* 2002;37(4):169-76.  
11  
12 41. Organization WH. *Developmental Difficulties in Early Childhood: Prevention, Early*  
13 *Identification, Assessment and Intervention in Low- And Middle-Income Countries*. World  
14 Health Organization , 2009.  
15  
16 42. Sohrpreston SL, Scaramella LV. Implications of Timing of Maternal Depressive  
17 Symptoms for Early Cognitive and Language Development. *Clinical Child Family*  
18 *Psychology Review* 2006;9(1):65-83.  
19  
20 43. Cooper PJ, Tomlinson M, Swartz L, *et al*. Post-partum depression and the mother-infant  
21 relationship in a South African peri-urban settlement. *British Journal of Psychiatry*  
22 1999;175(6):554-558.  
23  
24 44. Murray L, Cooper P. Effects of postnatal depression on infant development. *Archives of*  
25 *Disease in Childhood* 1997;77(2):99.  
26  
27 45. Bigelow AE, Maclean K, Proctor J, *et al*. Maternal sensitivity throughout infancy:  
28 Continuity and relation to attachment security. *Infant Behavior & Development*  
29 2010;33(1):50-60.  
30  
31 46. Mcelwain NL, Boothlaforce C. Maternal sensitivity to infant distress and nondistress as  
32 predictors of infant-mother attachment security. *Journal of Family Psychology Jfp Journal of*  
33 *the Division of Family Psychology of the American Psychological Association*  
34 2006;20(2):247.  
35  
36  
37  
38  
39  
40  
41  
42  
43  
44  
45  
46  
47  
48  
49  
50  
51  
52  
53  
54  
55  
56  
57  
58  
59  
60

- 1  
2  
3 47. Hipgrave DB, Fu X, Zhou H, *et al*. Poor complementary feeding practices and high  
4 anaemia prevalence among infants and young children in rural central and western China.  
5  
6 *European Journal of Clinical Nutrition* 2014;68(8):916.  
7  
8  
9 48. Lawson JA. Comparative Quantification of Health Risks. Global and Regional Burden of  
10 Disease Attributable to Selected Major Risk Factors by Majid Ezzati; Alan D. Lopez;  
11 Anthony Rodgers; Christopher J.L. Murray. World Health Organization 2004;1:163.  
12  
13  
14 49. Engle PL, Black MM, Behrman JR, *et al*. Strategies to avoid the loss of developmental  
15 potential in more than 200 million children in the developing world. *Lancet* 2007; 369: 229-  
16  
17  
18  
19  
20  
21  
22  
23  
24  
25  
26  
27  
28  
29  
30  
31  
32  
33  
34  
35  
36  
37  
38  
39  
40  
41  
42  
43  
44  
45  
46  
47  
48  
49  
50  
51  
52  
53  
54  
55  
56  
57  
58  
59  
60



1  
2  
3 Figure 1. Structural equation model and standardised coefficient for relationships between  
4 factors that theoretically influence suspected developmental delay  
5  
6  
7  
8  
9  
10  
11  
12  
13  
14  
15  
16  
17  
18  
19  
20  
21  
22  
23  
24  
25  
26  
27  
28  
29  
30  
31  
32  
33  
34  
35  
36  
37  
38  
39  
40  
41  
42  
43  
44  
45  
46  
47  
48  
49  
50  
51  
52  
53  
54  
55  
56  
57  
58  
59  
60

For peer review only

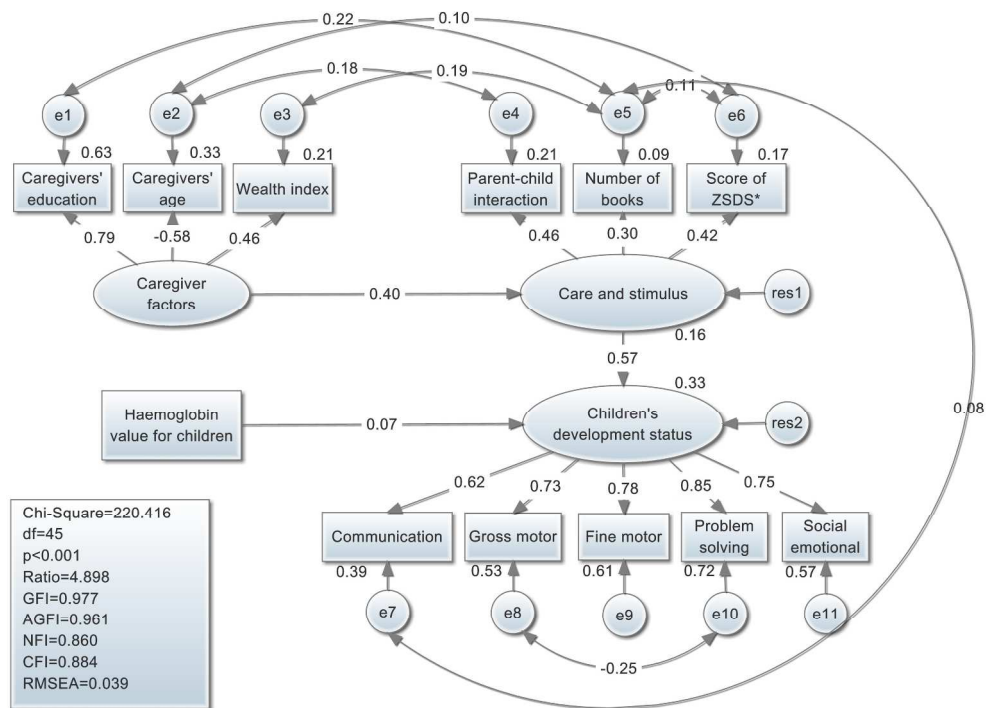

1054x758mm (72 x 72 DPI)

Peer review only

## Supplementary 1

Table S1. The squared multiple correlations of variables

| Variables                | Squared multiple correlations |
|--------------------------|-------------------------------|
| Caregivers' education    | 0.631                         |
| Caregivers' age          | 0.331                         |
| Wealth index             | 0.213                         |
| Parent-child interaction | 0.208                         |
| Number of books          | 0.092                         |
| Score of ZSDS            | 0.172                         |
| Communication            | 0.387                         |
| Gross motor              | 0.527                         |
| Fine motor               | 0.605                         |
| Problem solving          | 0.719                         |
| Social emotional         | 0.566                         |

Note: ZSDS: Zung Self-rating Depression Scale

**STROBE 2007 (v4) Statement—Checklist of items that should be included in reports of *cross-sectional studies***

| Section/Topic                | Item # | Recommendation                                                                                                                                                                       | Reported on page # |
|------------------------------|--------|--------------------------------------------------------------------------------------------------------------------------------------------------------------------------------------|--------------------|
| <b>Title and abstract</b>    | 1      | (a) Indicate the study’s design with a commonly used term in the title or the abstract                                                                                               | 3                  |
|                              |        | (b) Provide in the abstract an informative and balanced summary of what was done and what was found                                                                                  | 3                  |
| <b>Introduction</b>          |        |                                                                                                                                                                                      |                    |
| Background/rationale         | 2      | Explain the scientific background and rationale for the investigation being reported                                                                                                 | 5-7                |
| Objectives                   | 3      | State specific objectives, including any prespecified hypotheses                                                                                                                     | 7                  |
| <b>Methods</b>               |        |                                                                                                                                                                                      |                    |
| Study design                 | 4      | Present key elements of study design early in the paper                                                                                                                              | 7-8                |
| Setting                      | 5      | Describe the setting, locations, and relevant dates, including periods of recruitment, exposure, follow-up, and data collection                                                      |                    |
| Participants                 | 6      | (a) Give the eligibility criteria, and the sources and methods of selection of participants                                                                                          | 7-8                |
| Variables                    | 7      | Clearly define all outcomes, exposures, predictors, potential confounders, and effect modifiers. Give diagnostic criteria, if applicable                                             | 9-11               |
| Data sources/<br>measurement | 8*     | For each variable of interest, give sources of data and details of methods of assessment (measurement). Describe comparability of assessment methods if there is more than one group |                    |
| Bias                         | 9      | Describe any efforts to address potential sources of bias                                                                                                                            |                    |
| Study size                   | 10     | Explain how the study size was arrived at                                                                                                                                            |                    |
| Quantitative variables       | 11     | Explain how quantitative variables were handled in the analyses. If applicable, describe which groupings were chosen and why                                                         |                    |
| Statistical methods          | 12     | (a) Describe all statistical methods, including those used to control for confounding                                                                                                | 12                 |
|                              |        | (b) Describe any methods used to examine subgroups and interactions                                                                                                                  |                    |
|                              |        | (c) Explain how missing data were addressed                                                                                                                                          |                    |
|                              |        | (d) If applicable, describe analytical methods taking account of sampling strategy                                                                                                   |                    |
|                              |        | (e) Describe any sensitivity analyses                                                                                                                                                |                    |
| <b>Results</b>               |        |                                                                                                                                                                                      |                    |

|                          |     |                                                                                                                                                                                                                                                                                                                                                                                                               |       |
|--------------------------|-----|---------------------------------------------------------------------------------------------------------------------------------------------------------------------------------------------------------------------------------------------------------------------------------------------------------------------------------------------------------------------------------------------------------------|-------|
| Participants             | 13* | (a) Report numbers of individuals at each stage of study—eg numbers potentially eligible, examined for eligibility, confirmed eligible, included in the study, completing follow-up, and analysed<br>(b) Give reasons for non-participation at each stage<br>(c) Consider use of a flow diagram                                                                                                               |       |
| Descriptive data         | 14* | (a) Give characteristics of study participants (eg demographic, clinical, social) and information on exposures and potential confounders<br>(b) Indicate number of participants with missing data for each variable of interest                                                                                                                                                                               | 14    |
| Outcome data             | 15* | Report numbers of outcome events or summary measures                                                                                                                                                                                                                                                                                                                                                          |       |
| Main results             | 16  | (a) Give unadjusted estimates and, if applicable, confounder-adjusted estimates and their precision (eg, 95% confidence interval). Make clear which confounders were adjusted for and why they were included<br>(b) Report category boundaries when continuous variables were categorized<br>(c) If relevant, consider translating estimates of relative risk into absolute risk for a meaningful time period |       |
| Other analyses           | 17  | Report other analyses done—eg analyses of subgroups and interactions, and sensitivity analyses                                                                                                                                                                                                                                                                                                                |       |
| <b>Discussion</b>        |     |                                                                                                                                                                                                                                                                                                                                                                                                               |       |
| Key results              | 18  | Summarise key results with reference to study objectives                                                                                                                                                                                                                                                                                                                                                      | 21-22 |
| Limitations              | 19  | Discuss limitations of the study, taking into account sources of potential bias or imprecision. Discuss both direction and magnitude of any potential bias                                                                                                                                                                                                                                                    | 25-26 |
| Interpretation           | 20  | Give a cautious overall interpretation of results considering objectives, limitations, multiplicity of analyses, results from similar studies, and other relevant evidence                                                                                                                                                                                                                                    | 22-25 |
| Generalisability         | 21  | Discuss the generalisability (external validity) of the study results                                                                                                                                                                                                                                                                                                                                         | 26    |
| <b>Other information</b> |     |                                                                                                                                                                                                                                                                                                                                                                                                               |       |
| Funding                  | 22  | Give the source of funding and the role of the funders for the present study and, if applicable, for the original study on which the present article is based                                                                                                                                                                                                                                                 | 27    |

\*Give information separately for cases and controls in case-control studies and, if applicable, for exposed and unexposed groups in cohort and cross-sectional studies.

**Note:** An Explanation and Elaboration article discusses each checklist item and gives methodological background and published examples of transparent reporting. The STROBE checklist is best used in conjunction with this article (freely available on the Web sites of PLoS Medicine at <http://www.plosmedicine.org/>, Annals of Internal Medicine at <http://www.annals.org/>, and Epidemiology at <http://www.epidem.com/>). Information on the STROBE Initiative is available at [www.strobe-statement.org](http://www.strobe-statement.org).
